# Supplementary material for: Dissecting the Biological Relevance and Clinical Impact of lncRNA MIAT in Multiple Myeloma
Source: MDPI journal article supplement (doi:10.3390/cancers13215518), 2021-11-03
Supplement: s1 [file Supplementary_Table_1.xlsx]

## Sheet: Foglio1
Table S1. Number and relative frequency of main IgH translocations (trx), copy number alterations (CNAs) and non-synonymous (NS) somatic mutations, in 660 BM-1 MM cases of MMRF_CoMMpass_IA15a cohort with available data about MIAT expression by RNA sequencing (RNA-seq), IgH trx by RNA-seq, NS somatic mutations by Whole Exome sequencing (WES) and CNAs by next generation sequencing (NGS)-based FISH …
IgH trx (RNA-seq)	N (%)
t(11;14)/CCND1	136 (20.6%)
t(6;14)/CCND3	9 (1.4%)
t(4;14)/WHSC1/FGFR3	89 (13.5%)
t(14;16)/MAF;t(14;20)/MAFB; t(8;16)/MAFA	42 (6.4%)
t(8;14)/MYC	27 (4.1%)
CNA (FISH-WES)	N (%)
del(13)(q14)/(q34)/RB1_20%	346 (52.4%)
1q21 gain_20%	240 (36.4%)
del(1)(p22)/CDKN2C_20%	199 (30.2%)
del(17)(p13)/TP53_20%	74 (11.2%)
HD	375 (56.8%)
NS Somatic Mutation (WES)	N (%)
DIS3	71 (10.8%)
N-RAS	146 (22.1%)
H-RAS	0 (0%)
K-RAS	160 (24.2%)
BRAF	51 (7.7%)
TP53	30 (4.5%)
FAM46C	66 (10%)
TRAF3	50 (7.6%)
