# Supplementary material for: Dissecting the Biological Relevance and Clinical Impact of lncRNA MIAT in Multiple Myeloma
Source: MDPI journal article supplement (doi:10.3390/cancers13215518), 2021-11-03
Supplement: s1 [file Supplementary_Table_2.xlsx]

## Sheet: Foglio1
Table S2. Results of Fisher's exact test measuring the correlation between MIAT expression level and main IgH translocations (trx), copy number alterations (CNAs) and non-synonymous (NS) somatic mutations in recurrently mutated genes in CoMMpass cohort. del(13q) refers to 13q14, 13q34 cytobands or RB1 locus; 1q gain to 1q21 cytoband; del(1p) to 1p22 or CDKN2C locus; del(17p) to 17p13 or TP53 locu…
IgH trx	MIAT I quartile N (%)	MIAT IV quartile N (%)	P-value	adj. P-value
t(4;14)
neg	159 (94.6%)	123 (73.7%)	0.0001	0.00085
pos	9 (5.4%)	44 (26.3%)
MAF trx
neg	156 (92.9%)	160 (95.8%)	0.3451	0.4889
pos	12 (7.1%)	7 (4.2%)
t(11;14)
neg	100 (59.5%)	154 (92.2%)	0.0001	0.00085
pos	68 (40.5%)	13 (7.8%)
t(6;14)
neg	165 (98.2%)	166 (99.4%)	0.6228	0.6617
pos	3 (1.8%)	1 (0.6%)
MYC.trx
neg	155 (92.3%)	164 (98.2%)	0.0184	0.07344
pos	13 (7.7%)	3 (1.8%)
CNA	MIAT I quartile N (%)	MIAT IV quartile N (%)	P-value	adj. P-value
del(13q)/RB1_20 percent
neg	92 (54.8%)	67 (40.1%)	0.0086	0.0487
pos	76 (45.2%)	100 (59.9%)
1q21 gain_20 percent
neg	116 (69.0%)	96 (57.5%)	0.0315	0.0893
pos	52 (31.0%)	71 (42.5%)
del(1p)/CDKN2C_20 percent
neg	93 (55.4%)	103 (61.7%)	0.268	0.4825
pos	75 (44.6%)	64 (38.3%)
del(17p)/TP53_20 percent
neg	154 (91.7%)	145 (86.8%)	0.1626	0.3949
pos	14 (8.3%)	22 (13.2%)
HD
neg	90 (53.6%)	68 (40.7%)	0.0216	0.07344
pos	78 (46.4%)	99 (59.3%)
NS Somatic Mutation	MIAT I quartile N (%)	MIAT IV quartile N (%)	P-value	adj. P-value
N-RAS
WT	129 (76.8%)	138 (82.6%)	0.2215	0.4707
mut	39 (23.2%)	29 (17.4%)
K-RAS
WT	134 (79.8%)	128 (76.6%)	0.5106	0.6548
mut	34 (20.2%)	39 (23.4%)
BRAF
WT	157 (93.5%)	155 (92.8%)	0.8327	0.8327
mut	11 (6.5%)	12 (7.2%)
TP53
WT	157 (93.5%)	161 (96.4%)	0.3196	0.4889
mut	11 (6.5%)	6 (3.6%)
FAM46C
WT	154 (91.7%)	147 (88.0%)	0.2838	0.4825
mut	14 (8.3%)	20 (12.0%)
TRAF3
WT	157 (93.5%)	152 (91%)	0.541	0.6548
mut	11 (6.5%)	15 (9%)
