# Supplementary material for: Dissecting the Biological Relevance and Clinical Impact of lncRNA MIAT in Multiple Myeloma
Source: MDPI journal article supplement (doi:10.3390/cancers13215518), 2021-11-03
Supplement: s1 [file Supplementary_Table_3.xlsx]

## Sheet: 9813DEprotein_annotated
Table S3. List of significant differentially expressed protein coding genes between MIAT extreme quartiles, by limma analysis at FDR 10% cut-off. 8834 up- and 979 down-regulated transcripts in quartile IV vs I are respectively ordered according to adjusted P-value. Fold change (FC), p-value and B statistics parameters are reported for each gene.
Gene ID	Gene symbol	FC	P.Value	adj.P.Val	B
ENSG00000105810	CDK6	3.09454	7.92e-30	1.52e-25	56.8048
ENSG00000175040	CHST2	4.08053	1.39e-27	1.33e-23	51.7531
ENSG00000100379	KCTD17	2.15028	2.16e-27	1.38e-23	51.3268
ENSG00000128294	TPST2	2.26649	3.6e-25	1.72e-21	46.3258
ENSG00000166341	DCHS1	1.41797	1.1e-24	3.82e-21	45.2366
ENSG00000158458	NRG2	2.87222	1.2e-24	3.82e-21	45.1527
ENSG00000088280	ASAP3	1.68864	1.55e-24	4.24e-21	44.9015
ENSG00000159403	C1R	3.24166	2.71e-24	6.49e-21	44.3551
ENSG00000162889	MAPKAPK2	1.84722	4.21e-24	8.96e-21	43.9245
ENSG00000118402	ELOVL4	2.78365	1.37e-23	2.62e-20	42.7732
ENSG00000067141	NEO1	1.9165	2.73e-23	4.75e-20	42.1005
ENSG00000125675	GRIA3	3.24628	7.19e-23	1.15e-19	41.1535
ENSG00000095110	NXPE1	2.25865	1.23e-22	1.82e-19	40.6271
ENSG00000185800	DMWD	1.36569	1.71e-22	2.34e-19	40.3065
ENSG00000144847	IGSF11	2.5214	3.12e-22	3.98e-19	39.721
ENSG00000179134	SAMD4B	1.38164	9.57e-22	1.1e-18	38.6269
ENSG00000174099	MSRB3	2.11787	9.79e-22	1.1e-18	38.6047
ENSG00000163536	SERPINI1	2.56719	1.33e-21	1.42e-18	38.3033
ENSG00000104812	GYS1	1.46143	1.86e-21	1.88e-18	37.977
ENSG00000130751	NPAS1	1.86624	2.8e-21	2.68e-18	37.5788
ENSG00000100368	CSF2RB	3.29691	8.93e-21	8.14e-18	36.448
ENSG00000172379	ARNT2	1.98081	1.1e-20	9.55e-18	36.2466
ENSG00000099365	STX1B	1.35241	1.35e-20	1.13e-17	36.0413
ENSG00000117322	CR2	1.78462	1.53e-20	1.22e-17	35.9251
ENSG00000124256	ZBP1	1.6703	1.6e-20	1.22e-17	35.8817
ENSG00000213347	MXD3	1.60962	1.72e-20	1.27e-17	35.8069
ENSG00000120820	GLT8D2	1.50279	1.91e-20	1.32e-17	35.7075
ENSG00000131018	SYNE1	1.62172	1.94e-20	1.32e-17	35.6916
ENSG00000113273	ARSB	1.45068	2.16e-20	1.43e-17	35.5855
ENSG00000170921	TANC2	1.78243	2.37e-20	1.51e-17	35.4952
ENSG00000115425	PECR	1.5939	2.74e-20	1.69e-17	35.3555
ENSG00000184785	SMIM10	2.02933	2.99e-20	1.79e-17	35.2702
ENSG00000028277	POU2F2	1.73547	3.14e-20	1.82e-17	35.2211
ENSG00000058668	ATP2B4	2.13968	4.79e-20	2.7e-17	34.8092
ENSG00000116717	GADD45A	2.6276	8.34e-20	4.55e-17	34.2676
ENSG00000148468	FAM171A1	3.00604	8.55e-20	4.55e-17	34.2439
ENSG00000104853	CLPTM1	1.35124	1.09e-19	5.66e-17	34.0032
ENSG00000125648	SLC25A23	1.61746	1.49e-19	7.36e-17	33.702
ENSG00000105173	CCNE1	2.02951	1.5e-19	7.36e-17	33.6955
ENSG00000160219	GAB3	1.56169	1.74e-19	8.31e-17	33.5525
ENSG00000106571	GLI3	2.01905	2.25e-19	1.05e-16	33.299
ENSG00000178980	SELENOW	1.49074	8.58e-19	3.91e-16	31.9949
ENSG00000188153	COL4A5	3.05965	9.15e-19	4.07e-16	31.9322
ENSG00000144935	TRPC1	1.49679	9.63e-19	4.19e-16	31.883
ENSG00000137501	SYTL2	2.24716	1.35e-18	5.63e-16	31.5517
ENSG00000183230	CTNNA3	1.90213	1.59e-18	6.37e-16	31.3967
ENSG00000105290	APLP1	2.05136	1.6e-18	6.37e-16	31.3893
ENSG00000196562	SULF2	4.5836	2.04e-18	7.99e-16	31.1488
ENSG00000122787	AKR1D1	1.90151	2.24e-18	8.59e-16	31.0578
ENSG00000165548	TMEM63C	2.32669	2.88e-18	1.08e-15	30.8139
ENSG00000110841	PPFIBP1	1.84284	2.93e-18	1.08e-15	30.7976
ENSG00000167306	MYO5B	2.16907	3.05e-18	1.1e-15	30.7577
ENSG00000131943	C19orf12	1.37962	3.6e-18	1.28e-15	30.5973
ENSG00000204681	GABBR1	2.48142	4.6e-18	1.57e-15	30.3589
ENSG00000100365	NCF4	2.00504	5.32e-18	1.79e-15	30.2175
ENSG00000196368	NUDT11	1.72518	6.98e-18	2.31e-15	29.9514
ENSG00000140332	TLE3	1.57147	8.09e-18	2.62e-15	29.8082
ENSG00000110719	TCIRG1	1.48914	1.05e-17	3.35e-15	29.5535
ENSG00000272333	KMT2B	1.36963	1.08e-17	3.4e-15	29.5249
ENSG00000120875	DUSP4	3.46082	1.6e-17	4.85e-15	29.1463
ENSG00000116117	PARD3B	1.40363	1.76e-17	5.27e-15	29.05
ENSG00000109944	JHY	1.999	1.88e-17	5.54e-15	28.986
ENSG00000070882	OSBPL3	2.5032	2.02e-17	5.87e-15	28.9151
ENSG00000113575	PPP2CA	1.36586	2.1e-17	5.99e-15	28.8812
ENSG00000111640	GAPDH	1.46962	2.22e-17	6.25e-15	28.8244
ENSG00000136950	ARPC5L	1.55627	2.54e-17	6.95e-15	28.6937
ENSG00000156515	HK1	1.58726	2.92e-17	7.88e-15	28.5572
ENSG00000112782	CLIC5	2.12825	3.17e-17	8.43e-15	28.478
ENSG00000157680	DGKI	2.13077	3.5e-17	9.05e-15	28.3814
ENSG00000137571	SLCO5A1	1.99386	3.68e-17	9.4e-15	28.3314
ENSG00000100968	NFATC4	2.34997	3.79e-17	9.55e-15	28.3032
ENSG00000101871	MID1	1.44836	4.2e-17	1.04e-14	28.2037
ENSG00000121064	SCPEP1	1.84253	4.68e-17	1.15e-14	28.0988
ENSG00000171552	BCL2L1	1.79457	5.06e-17	1.23e-14	28.0232
ENSG00000137078	SIT1	2.69111	5.39e-17	1.29e-14	27.9605
ENSG00000164620	RELL2	1.78779	6.27e-17	1.48e-14	27.814
ENSG00000154277	UCHL1	7.25252	7.21e-17	1.68e-14	27.6769
ENSG00000047346	FAM214A	1.56536	1.21e-16	2.79e-14	27.1739
ENSG00000157343	ARMC12	1.52192	1.27e-16	2.89e-14	27.1284
ENSG00000163754	GYG1	1.37995	1.28e-16	2.89e-14	27.1159
ENSG00000159884	CCDC107	1.45369	1.42e-16	3.16e-14	27.017
ENSG00000152503	TRIM36	1.63052	1.62e-16	3.55e-14	26.8923
ENSG00000105122	RASAL3	1.66666	1.74e-16	3.74e-14	26.8209
ENSG00000114859	CLCN2	1.40437	1.74e-16	3.74e-14	26.8193
ENSG00000132694	ARHGEF11	1.60154	1.77e-16	3.77e-14	26.8008
ENSG00000104936	DMPK	1.45323	1.89e-16	3.98e-14	26.7374
ENSG00000132356	PRKAA1	1.41002	2.06e-16	4.29e-14	26.6542
ENSG00000042832	TG	1.77095	2.15e-16	4.43e-14	26.6133
ENSG00000196961	AP2A1	1.31602	2.28e-16	4.65e-14	26.5552
ENSG00000105618	PRPF31	1.2419	2.34e-16	4.72e-14	26.5311
ENSG00000039560	RAI14	1.4016	2.51e-16	4.99e-14	26.4628
ENSG00000104154	SLC30A4	1.50098	2.97e-16	5.76e-14	26.2993
ENSG00000136854	STXBP1	1.70209	2.98e-16	5.76e-14	26.2965
ENSG00000033100	CHPF2	1.39567	3.34e-16	6.33e-14	26.1855
ENSG00000126461	SCAF1	1.32009	3.77e-16	7.04e-14	26.0673
ENSG00000237172	B3GNT9	1.74838	3.79e-16	7.04e-14	26.0626
ENSG00000206077	ZDHHC11B	1.82109	4.11e-16	7.56e-14	25.9839
ENSG00000169641	LUZP1	1.36139	4.84e-16	8.82e-14	25.8247
ENSG00000079432	CIC	1.42675	5.04e-16	9.1e-14	25.7847
ENSG00000130830	MPP1	1.88565	7.2e-16	1.29e-13	25.4377
ENSG00000105063	PPP6R1	1.33613	7.6e-16	1.35e-13	25.3845
ENSG00000173221	GLRX	1.83007	8.19e-16	1.44e-13	25.3116
ENSG00000135253	KCP	1.61186	9.19e-16	1.58e-13	25.2001
ENSG00000198624	CCDC69	1.46475	9.7e-16	1.66e-13	25.1476
ENSG00000183624	HMCES	1.39522	9.91e-16	1.68e-13	25.1263
ENSG00000232434	AJM1	1.43395	1.14e-15	1.92e-13	24.987
ENSG00000165181	SHOC1	1.14669	1.2e-15	1.99e-13	24.9422
ENSG00000185222	TCEAL9	2.08926	1.41e-15	2.32e-13	24.7855
ENSG00000160570	DEDD2	1.33481	1.51e-15	2.47e-13	24.716
ENSG00000146094	DOK3	1.76469	1.58e-15	2.54e-13	24.6727
ENSG00000104327	CALB1	1.34469	1.61e-15	2.57e-13	24.6526
ENSG00000142733	MAP3K6	1.78369	1.67e-15	2.62e-13	24.62
ENSG00000139190	VAMP1	1.76103	1.67e-15	2.62e-13	24.6181
ENSG00000128203	ASPHD2	1.61519	1.7e-15	2.64e-13	24.6021
ENSG00000003402	CFLAR	1.67173	1.72e-15	2.65e-13	24.5914
ENSG00000186283	TOR3A	1.68644	1.85e-15	2.81e-13	24.5201
ENSG00000186364	NUDT17	1.5129	1.88e-15	2.83e-13	24.5048
ENSG00000118242	MREG	1.73078	1.99e-15	2.98e-13	24.4475
ENSG00000154258	ABCA9	1.46353	2.01e-15	2.98e-13	24.4407
ENSG00000137449	CPEB2	1.63346	2.2e-15	3.23e-13	24.3523
ENSG00000162729	IGSF8	1.4597	2.27e-15	3.32e-13	24.3191
ENSG00000134324	LPIN1	1.68458	2.49e-15	3.59e-13	24.2286
ENSG00000148343	MIGA2	1.35325	2.8e-15	3.99e-13	24.1175
ENSG00000167216	KATNAL2	1.55895	2.93e-15	4.16e-13	24.0715
ENSG00000105698	USF2	1.26768	3.08e-15	4.33e-13	24.0246
ENSG00000123360	PDE1B	1.56821	3.19e-15	4.46e-13	23.9889
ENSG00000130508	PXDN	2.99192	3.6e-15	4.99e-13	23.8723
ENSG00000137338	PGBD1	1.3799	3.73e-15	5.14e-13	23.8361
ENSG00000113615	SEC24A	1.48432	3.76e-15	5.14e-13	23.8299
ENSG00000179889	PDXDC1	1.37974	4e-15	5.43e-13	23.7698
ENSG00000105219	CCNP	1.47108	4.48e-15	6.02e-13	23.6599
ENSG00000116141	MARK1	1.76619	4.5e-15	6.02e-13	23.6546
ENSG00000250305	TRMT9B	1.80482	4.62e-15	6.15e-13	23.6286
ENSG00000160588	MPZL3	1.73621	4.68e-15	6.17e-13	23.6172
ENSG00000066294	CD84	1.62688	4.98e-15	6.49e-13	23.5562
ENSG00000169021	UQCRFS1	1.26642	4.98e-15	6.49e-13	23.5566
ENSG00000049656	CLPTM1L	1.40942	5.21e-15	6.74e-13	23.5123
ENSG00000134369	NAV1	1.46192	5.48e-15	7.04e-13	23.4637
ENSG00000213523	SRA1	1.31673	5.61e-15	7.16e-13	23.4399
ENSG00000087494	PTHLH	2.41372	5.77e-15	7.27e-13	23.4125
ENSG00000137831	UACA	2.04618	5.77e-15	7.27e-13	23.4126
ENSG00000133619	KRBA1	1.34316	6.21e-15	7.74e-13	23.3417
ENSG00000116604	MEF2D	1.50626	7.12e-15	8.73e-13	23.2089
ENSG00000100644	HIF1A	2.40514	7.22e-15	8.8e-13	23.1956
ENSG00000150667	FSIP1	1.4775	7.97e-15	9.6e-13	23.0989
ENSG00000135049	AGTPBP1	1.30666	9.11e-15	1.09e-12	22.969
ENSG00000134516	DOCK2	1.32426	9.46e-15	1.12e-12	22.9326
ENSG00000137767	SQOR	1.35595	9.48e-15	1.12e-12	22.9309
ENSG00000135074	ADAM19	1.8008	9.65e-15	1.13e-12	22.9134
ENSG00000168734	PKIG	1.75883	9.89e-15	1.15e-12	22.8891
ENSG00000163874	ZC3H12A	2.05272	1.01e-14	1.17e-12	22.8678
ENSG00000185614	INKA1	1.37873	1.07e-14	1.24e-12	22.8113
ENSG00000136828	RALGPS1	1.5719	1.21e-14	1.38e-12	22.6966
ENSG00000153707	PTPRD	1.96108	1.23e-14	1.41e-12	22.6748
ENSG00000137842	TMEM62	1.35934	1.31e-14	1.48e-12	22.6164
ENSG00000120899	PTK2B	1.62762	1.35e-14	1.53e-12	22.5834
ENSG00000163932	PRKCD	1.50991	1.46e-14	1.63e-12	22.5112
ENSG00000105767	CADM4	1.84562	1.57e-14	1.75e-12	22.4384
ENSG00000143226	FCGR2A	2.27472	1.58e-14	1.75e-12	22.4311
ENSG00000135916	ITM2C	1.95824	1.6e-14	1.76e-12	22.4208
ENSG00000135454	B4GALNT1	1.51663	1.63e-14	1.78e-12	22.4058
ENSG00000105323	HNRNPUL1	1.26109	1.68e-14	1.81e-12	22.3726
ENSG00000163399	ATP1A1	1.43392	1.69e-14	1.81e-12	22.3665
ENSG00000171962	DRC3	1.39796	1.69e-14	1.81e-12	22.37
ENSG00000140743	CDR2	1.33797	1.69e-14	1.81e-12	22.3662
ENSG00000141934	PLPP2	3.07923	1.7e-14	1.81e-12	22.3623
ENSG00000124140	SLC12A5	1.44779	1.8e-14	1.9e-12	22.3083
ENSG00000163069	SGCB	1.93413	1.83e-14	1.91e-12	22.2926
ENSG00000180304	OAZ2	1.24246	1.83e-14	1.91e-12	22.2929
ENSG00000088538	DOCK3	1.68779	1.89e-14	1.97e-12	22.2573
ENSG00000177839	PCDHB9	1.46727	1.98e-14	2.05e-12	22.2162
ENSG00000174749	FAM241A	1.32722	2.08e-14	2.14e-12	22.1677
ENSG00000124126	PREX1	2.27344	2.25e-14	2.31e-12	22.0888
ENSG00000043039	BARX2	3.19223	2.32e-14	2.35e-12	22.0586
ENSG00000131788	PIAS3	1.41058	2.32e-14	2.35e-12	22.0623
ENSG00000196396	PTPN1	1.63016	2.36e-14	2.38e-12	22.0422
ENSG00000073417	PDE8A	1.49656	2.54e-14	2.55e-12	21.9709
ENSG00000162739	SLAMF6	2.28171	2.6e-14	2.6e-12	21.9482
ENSG00000166532	RIMKLB	1.75118	2.66e-14	2.64e-12	21.9264
ENSG00000244607	CCDC13	1.22621	2.72e-14	2.68e-12	21.9074
ENSG00000099341	PSMD8	1.2657	2.9e-14	2.85e-12	21.8434
ENSG00000122707	RECK	1.54868	2.93e-14	2.86e-12	21.8344
ENSG00000127526	SLC35E1	1.31272	2.99e-14	2.9e-12	21.8145
ENSG00000130202	NECTIN2	1.59824	3.02e-14	2.92e-12	21.8054
ENSG00000110675	ELMOD1	1.98714	3.08e-14	2.96e-12	21.7851
ENSG00000121753	ADGRB2	1.68894	3.19e-14	3.05e-12	21.7507
ENSG00000108821	COL1A1	1.72081	3.26e-14	3.1e-12	21.7299
ENSG00000136235	GPNMB	1.9781	3.39e-14	3.21e-12	21.693
ENSG00000198963	RORB	1.29943	3.93e-14	3.7e-12	21.5486
ENSG00000105443	CYTH2	1.2915	3.95e-14	3.7e-12	21.5447
ENSG00000013364	MVP	1.38643	4.3e-14	4.02e-12	21.4611
ENSG00000149295	DRD2	1.25141	4.42e-14	4.09e-12	21.4333
ENSG00000170906	NDUFA3	1.25678	4.85e-14	4.46e-12	21.3451
ENSG00000183317	EPHA10	1.96281	5.38e-14	4.9e-12	21.2441
ENSG00000055163	CYFIP2	1.7164	5.38e-14	4.9e-12	21.2435
ENSG00000170209	ANKK1	1.48697	6.78e-14	6.15e-12	21.0191
ENSG00000166446	CDYL2	1.34019	7.19e-14	6.46e-12	20.9618
ENSG00000182240	BACE2	1.86723	7.45e-14	6.66e-12	20.9277
ENSG00000163531	NFASC	1.29204	7.91e-14	7.04e-12	20.8691
ENSG00000114547	ROPN1B	1.21755	7.98e-14	7.07e-12	20.8609
ENSG00000152049	KCNE4	1.35332	8.2e-14	7.23e-12	20.8344
ENSG00000086289	EPDR1	1.85568	8.35e-14	7.33e-12	20.8168
ENSG00000137877	SPTBN5	1.36584	9.15e-14	8e-12	20.7279
ENSG00000197043	ANXA6	1.66495	1.06e-13	9.25e-12	20.5814
ENSG00000151917	BEND6	1.31619	1.17e-13	1.01e-11	20.4876
ENSG00000197077	KIAA1671	1.09902	1.19e-13	1.02e-11	20.4747
ENSG00000164970	FAM219A	1.42218	1.22e-13	1.04e-11	20.4484
ENSG00000163449	TMEM169	1.05367	1.27e-13	1.08e-11	20.4128
ENSG00000163961	RNF168	1.43103	1.41e-13	1.19e-11	20.3081
ENSG00000066382	MPPED2	1.97444	1.47e-13	1.24e-11	20.2651
ENSG00000090554	FLT3LG	1.38021	1.55e-13	1.3e-11	20.2171
ENSG00000177380	PPFIA3	1.44326	1.57e-13	1.31e-11	20.2053
ENSG00000120217	CD274	1.61907	1.74e-13	1.44e-11	20.1055
ENSG00000198353	HOXC4	1.71843	1.85e-13	1.53e-11	20.0427
ENSG00000183963	SMTN	1.58373	1.92e-13	1.58e-11	20.0056
ENSG00000141665	FBXO15	1.33339	1.94e-13	1.59e-11	19.9969
ENSG00000126246	IGFLR1	1.63103	1.97e-13	1.6e-11	19.984
ENSG00000164466	SFXN1	1.38215	2e-13	1.62e-11	19.9672
ENSG00000134590	RTL8C	1.67767	2.08e-13	1.67e-11	19.93
ENSG00000164741	DLC1	1.96613	2.2e-13	1.76e-11	19.8781
ENSG00000143753	DEGS1	1.34202	2.3e-13	1.83e-11	19.8344
ENSG00000047621	C12orf4	1.41104	2.33e-13	1.85e-11	19.8196
ENSG00000160867	FGFR4	1.37007	2.35e-13	1.86e-11	19.811
ENSG00000159335	PTMS	2.22021	2.41e-13	1.9e-11	19.7863
ENSG00000143199	ADCY10	1.16488	2.5e-13	1.96e-11	19.7518
ENSG00000008256	CYTH3	1.61285	2.67e-13	2.09e-11	19.6871
ENSG00000213190	MLLT11	1.50203	2.74e-13	2.13e-11	19.6645
ENSG00000011451	WIZ	1.27827	2.84e-13	2.2e-11	19.6268
ENSG00000053524	MCF2L2	1.46481	2.89e-13	2.23e-11	19.6101
ENSG00000144893	MED12L	1.78854	2.94e-13	2.26e-11	19.5951
ENSG00000163577	EIF5A2	1.26771	2.99e-13	2.29e-11	19.5784
ENSG00000172568	FNDC9	1.32157	3.02e-13	2.3e-11	19.5697
ENSG00000172780	RAB43	1.42214	3.03e-13	2.3e-11	19.5659
ENSG00000067225	PKM	1.3833	3.04e-13	2.3e-11	19.5631
ENSG00000198873	GRK5	1.49285	3.05e-13	2.3e-11	19.5579
ENSG00000043143	JADE2	1.66874	3.17e-13	2.38e-11	19.5226
ENSG00000102312	PORCN	1.26742	3.22e-13	2.41e-11	19.5048
ENSG00000075142	SRI	1.332	3.3e-13	2.46e-11	19.4823
ENSG00000131504	DIAPH1	1.33712	3.41e-13	2.53e-11	19.451
ENSG00000075340	ADD2	1.51235	3.56e-13	2.62e-11	19.4093
ENSG00000072071	ADGRL1	1.63617	3.64e-13	2.67e-11	19.3866
ENSG00000108924	HLF	1.43377	3.71e-13	2.71e-11	19.3686
ENSG00000107362	ABHD17B	1.39785	3.73e-13	2.71e-11	19.3647
ENSG00000100109	TFIP11	1.32642	3.76e-13	2.73e-11	19.3546
ENSG00000197694	SPTAN1	1.45377	4.04e-13	2.92e-11	19.2859
ENSG00000186716	BCR	1.39683	4.09e-13	2.94e-11	19.2748
ENSG00000272899	ATP6V1FNB	1.54645	4.14e-13	2.97e-11	19.2621
ENSG00000163959	SLC51A	1.29657	4.2e-13	2.99e-11	19.2475
ENSG00000099785	MARCHF2	1.31585	4.21e-13	2.99e-11	19.2457
ENSG00000158014	SLC30A2	1.13158	4.22e-13	2.99e-11	19.2448
ENSG00000115604	IL18R1	1.52682	4.27e-13	3.02e-11	19.2323
ENSG00000117335	CD46	1.48296	4.34e-13	3.06e-11	19.2163
ENSG00000172380	GNG12	1.43263	4.36e-13	3.06e-11	19.2115
ENSG00000078043	PIAS2	1.41268	4.46e-13	3.12e-11	19.1895
ENSG00000137634	NXPE4	2.45205	4.69e-13	3.27e-11	19.1411
ENSG00000114450	GNB4	1.56719	4.77e-13	3.31e-11	19.1251
ENSG00000105085	MED26	1.36866	5.02e-13	3.47e-11	19.0757
ENSG00000085449	WDFY1	1.45911	5.54e-13	3.81e-11	18.9804
ENSG00000127947	PTPN12	1.35178	5.55e-13	3.81e-11	18.9772
ENSG00000002726	AOC1	1.79976	5.63e-13	3.85e-11	18.9647
ENSG00000143851	PTPN7	1.54044	5.89e-13	4.01e-11	18.9203
ENSG00000091428	RAPGEF4	1.99033	5.99e-13	4.07e-11	18.9038
ENSG00000076067	RBMS2	1.31864	6.04e-13	4.08e-11	18.8964
ENSG00000144749	LRIG1	1.66274	6.32e-13	4.24e-11	18.8525
ENSG00000149925	ALDOA	1.28533	6.6e-13	4.41e-11	18.8093
ENSG00000145700	ANKRD31	1.23551	6.61e-13	4.41e-11	18.8081
ENSG00000113163	CERT1	1.28401	7.11e-13	4.73e-11	18.7373
ENSG00000167083	GNGT2	1.54021	7.18e-13	4.76e-11	18.7278
ENSG00000197965	MPZL1	1.42606	7.95e-13	5.23e-11	18.629
ENSG00000240771	ARHGEF25	1.7676	8.21e-13	5.38e-11	18.5982
ENSG00000130758	MAP3K10	1.33736	8.24e-13	5.38e-11	18.5945
ENSG00000178947	SMIM10L2A	1.23434	8.3e-13	5.4e-11	18.5878
ENSG00000136280	CCM2	1.40171	8.66e-13	5.62e-11	18.546
ENSG00000141644	MBD1	1.33187	8.87e-13	5.74e-11	18.5233
ENSG00000171720	HDAC3	1.22388	9.31e-13	5.99e-11	18.4759
ENSG00000188993	LRRC66	1.13755	9.33e-13	5.99e-11	18.474
ENSG00000164949	GEM	2.51688	9.36e-13	5.99e-11	18.4707
ENSG00000182158	CREB3L2	1.49235	9.59e-13	6.12e-11	18.4471
ENSG00000188818	ZDHHC11	1.70464	1.02e-12	6.5e-11	18.385
ENSG00000147873	IFNA5	1.06858	1.05e-12	6.64e-11	18.3621
ENSG00000066697	MSANTD3	1.41147	1.08e-12	6.82e-11	18.3322
ENSG00000171310	CHST11	1.50095	1.09e-12	6.84e-11	18.3264
ENSG00000135638	EMX1	1.44185	1.09e-12	6.84e-11	18.3233
ENSG00000166401	SERPINB8	1.97293	1.1e-12	6.88e-11	18.3111
ENSG00000120324	PCDHB10	1.31203	1.1e-12	6.88e-11	18.3114
ENSG00000105982	RNF32	1.52854	1.11e-12	6.91e-11	18.3043
ENSG00000076662	ICAM3	1.51351	1.13e-12	7.03e-11	18.2843
ENSG00000187186	AL162231.1	1.46443	1.14e-12	7.03e-11	18.2809
ENSG00000144619	CNTN4	1.50876	1.15e-12	7.06e-11	18.2744
ENSG00000137101	CD72	1.45404	1.16e-12	7.11e-11	18.2642
ENSG00000105438	KDELR1	1.30341	1.19e-12	7.26e-11	18.2375
ENSG00000137070	IL11RA	1.45313	1.27e-12	7.67e-11	18.1777
ENSG00000126952	NXF5	1.28397	1.29e-12	7.8e-11	18.1581
ENSG00000163631	ALB	1.37609	1.32e-12	7.96e-11	18.136
ENSG00000105171	POP4	1.21979	1.33e-12	7.98e-11	18.1304
ENSG00000141485	SLC13A5	1.2329	1.36e-12	8.14e-11	18.1086
ENSG00000095319	NUP188	1.32463	1.39e-12	8.28e-11	18.089
ENSG00000198794	SCAMP5	1.82814	1.43e-12	8.48e-11	18.057
ENSG00000060491	OGFR	1.30839	1.43e-12	8.48e-11	18.0573
ENSG00000184206	GOLGA6L4	1.41355	1.44e-12	8.48e-11	18.0558
ENSG00000136848	DAB2IP	1.75517	1.45e-12	8.54e-11	18.0466
ENSG00000171044	XKR6	1.51702	1.48e-12	8.69e-11	18.0266
ENSG00000104177	MYEF2	1.61105	1.53e-12	8.95e-11	17.9948
ENSG00000163810	TGM4	1.26346	1.55e-12	9.04e-11	17.9821
ENSG00000104888	SLC17A7	1.09009	1.56e-12	9.1e-11	17.9734
ENSG00000182601	HS3ST4	1.67596	1.59e-12	9.2e-11	17.9592
ENSG00000185920	PTCH1	1.75564	1.6e-12	9.23e-11	17.9536
ENSG00000149054	ZNF215	1.60387	1.61e-12	9.26e-11	17.9473
ENSG00000087086	FTL	1.43927	1.62e-12	9.33e-11	17.9368
ENSG00000161082	CELF5	1.13702	1.7e-12	9.77e-11	17.8899
ENSG00000154124	OTULIN	1.38482	1.73e-12	9.87e-11	17.8764
ENSG00000099991	CABIN1	1.39125	1.74e-12	9.94e-11	17.8672
ENSG00000243910	TUBA4B	1.28048	1.78e-12	1.01e-10	17.848
ENSG00000144747	TMF1	1.36686	1.81e-12	1.02e-10	17.8334
ENSG00000105221	AKT2	1.2422	1.81e-12	1.02e-10	17.8302
ENSG00000198925	ATG9A	1.37929	1.88e-12	1.06e-10	17.7935
ENSG00000127080	IPPK	1.2718	1.99e-12	1.11e-10	17.7414
ENSG00000107862	GBF1	1.34885	2.04e-12	1.14e-10	17.7133
ENSG00000113924	HGD	1.30412	2.13e-12	1.18e-10	17.6759
ENSG00000007047	MARK4	1.24115	2.16e-12	1.2e-10	17.6583
ENSG00000105220	GPI	1.31821	2.24e-12	1.23e-10	17.6266
ENSG00000125656	CLPP	1.22372	2.25e-12	1.24e-10	17.6197
ENSG00000149131	SERPING1	2.03409	2.45e-12	1.34e-10	17.538
ENSG00000139182	CLSTN3	1.39211	2.52e-12	1.38e-10	17.5099
ENSG00000105991	HOXA1	1.24821	2.55e-12	1.39e-10	17.4991
ENSG00000155903	RASA2	1.37566	2.73e-12	1.48e-10	17.4344
ENSG00000105723	GSK3A	1.24846	2.89e-12	1.56e-10	17.3796
ENSG00000127445	PIN1	1.23363	3.02e-12	1.63e-10	17.3347
ENSG00000042813	ZPBP	1.18421	3.08e-12	1.66e-10	17.3163
ENSG00000026652	AGPAT4	1.51989	3.21e-12	1.72e-10	17.2759
ENSG00000142252	GEMIN7	1.28534	3.34e-12	1.79e-10	17.2372
ENSG00000250673	REELD1	1.52243	3.47e-12	1.85e-10	17.2
ENSG00000063169	BICRA	1.28978	3.51e-12	1.87e-10	17.189
ENSG00000175416	CLTB	1.32202	3.69e-12	1.96e-10	17.1413
ENSG00000215174	NLRP2B	1.03634	3.82e-12	2.02e-10	17.1068
ENSG00000141968	VAV1	1.37338	3.87e-12	2.04e-10	17.0949
ENSG00000116544	DLGAP3	1.26565	3.92e-12	2.06e-10	17.0816
ENSG00000166311	SMPD1	1.38948	3.93e-12	2.06e-10	17.0802
ENSG00000140548	ZNF710	1.37207	4.15e-12	2.17e-10	17.028
ENSG00000101493	ZNF516	1.67935	4.17e-12	2.17e-10	17.023
ENSG00000167535	CACNB3	1.59151	4.19e-12	2.18e-10	17.0182
ENSG00000166501	PRKCB	2.30312	4.38e-12	2.27e-10	16.9757
ENSG00000065534	MYLK	1.78549	4.52e-12	2.34e-10	16.9445
ENSG00000165323	FAT3	1.07173	4.57e-12	2.36e-10	16.9347
ENSG00000187601	MAGEH1	1.44457	4.69e-12	2.41e-10	16.9093
ENSG00000204161	TMEM273	1.8897	4.81e-12	2.47e-10	16.8853
ENSG00000133065	SLC41A1	1.37771	4.96e-12	2.53e-10	16.8544
ENSG00000104866	PPP1R37	1.27834	4.96e-12	2.53e-10	16.8549
ENSG00000119522	DENND1A	1.27188	4.96e-12	2.53e-10	16.8545
ENSG00000102981	PARD6A	1.3344	4.98e-12	2.53e-10	16.8501
ENSG00000085662	AKR1B1	1.74039	5.02e-12	2.54e-10	16.8429
ENSG00000154237	LRRK1	1.61825	5.03e-12	2.54e-10	16.8417
ENSG00000147912	FBXO10	1.5698	5.18e-12	2.61e-10	16.8122
ENSG00000158966	CACHD1	1.31934	5.24e-12	2.63e-10	16.8018
ENSG00000085063	CD59	1.48291	5.34e-12	2.67e-10	16.7827
ENSG00000267120	AD000671.2	1.44311	5.35e-12	2.67e-10	16.7811
ENSG00000118162	KPTN	1.3674	5.42e-12	2.7e-10	16.7689
ENSG00000007402	CACNA2D2	1.27611	5.48e-12	2.72e-10	16.7589
ENSG00000196116	TDRD7	1.34594	5.53e-12	2.74e-10	16.7497
ENSG00000138867	GUCD1	1.29251	5.62e-12	2.78e-10	16.7331
ENSG00000159459	UBR1	1.28058	5.83e-12	2.87e-10	16.6985
ENSG00000122223	CD244	1.3972	5.86e-12	2.88e-10	16.6939
ENSG00000163466	ARPC2	1.25663	5.88e-12	2.89e-10	16.6894
ENSG00000130813	SHFL	1.39113	6.11e-12	2.99e-10	16.6531
ENSG00000196358	NTNG2	1.46997	6.34e-12	3.09e-10	16.6175
ENSG00000183723	CMTM4	1.42669	6.37e-12	3.1e-10	16.6121
ENSG00000120903	CHRNA2	1.36775	6.5e-12	3.16e-10	16.5932
ENSG00000151117	TMEM86A	1.38956	6.75e-12	3.27e-10	16.5564
ENSG00000086015	MAST2	1.30604	7.16e-12	3.45e-10	16.4987
ENSG00000149294	NCAM1	3.41382	7.45e-12	3.58e-10	16.4606
ENSG00000137693	YAP1	1.25611	7.67e-12	3.68e-10	16.4319
ENSG00000171621	SPSB1	1.69198	7.89e-12	3.77e-10	16.4053
ENSG00000140464	PML	1.33769	8.28e-12	3.95e-10	16.3581
ENSG00000027697	IFNGR1	1.59541	8.37e-12	3.99e-10	16.3474
ENSG00000174448	STARD6	1.14894	8.7e-12	4.13e-10	16.3105
ENSG00000143515	ATP8B2	1.49867	8.74e-12	4.14e-10	16.3054
ENSG00000183496	MEX3B	1.45269	8.77e-12	4.15e-10	16.3023
ENSG00000120314	WDR55	1.26936	9.02e-12	4.24e-10	16.2753
ENSG00000198835	GJC2	1.14179	9.26e-12	4.35e-10	16.2498
ENSG00000142039	CCDC97	1.32423	9.33e-12	4.37e-10	16.2424
ENSG00000106665	CLIP2	1.38764	9.47e-12	4.42e-10	16.2287
ENSG00000196338	NLGN3	1.26288	9.57e-12	4.46e-10	16.2181
ENSG00000105429	MEGF8	1.33879	9.61e-12	4.47e-10	16.2138
ENSG00000115556	PLCD4	1.28629	9.65e-12	4.47e-10	16.2098
ENSG00000055118	KCNH2	2.18962	9.94e-12	4.6e-10	16.1811
ENSG00000100243	CYB5R3	1.33452	9.97e-12	4.6e-10	16.1788
ENSG00000154760	SLFN13	1.64367	9.99e-12	4.6e-10	16.1764
ENSG00000205683	DPF3	1.87663	1.03e-11	4.75e-10	16.1425
ENSG00000163913	IFT122	1.31304	1.04e-11	4.76e-10	16.1378
ENSG00000110811	P3H3	2.29056	1.07e-11	4.85e-10	16.1123
ENSG00000127124	HIVEP3	1.3097	1.07e-11	4.85e-10	16.1133
ENSG00000137203	TFAP2A	1.6485	1.09e-11	4.95e-10	16.0896
ENSG00000134363	FST	1.39236	1.09e-11	4.95e-10	16.0918
ENSG00000184254	ALDH1A3	1.31058	1.1e-11	4.96e-10	16.0846
ENSG00000130560	UBAC1	1.26846	1.11e-11	4.98e-10	16.0776
ENSG00000164197	RNF180	1.63246	1.11e-11	5e-10	16.0718
ENSG00000074370	ATP2A3	1.54405	1.12e-11	5.02e-10	16.0654
ENSG00000112658	SRF	1.43027	1.21e-11	5.42e-10	15.9889
ENSG00000164181	ELOVL7	1.90433	1.22e-11	5.45e-10	15.9823
ENSG00000102924	CBLN1	1.54146	1.23e-11	5.48e-10	15.9718
ENSG00000143919	CAMKMT	1.29609	1.23e-11	5.48e-10	15.9725
ENSG00000169432	SCN9A	1.72317	1.24e-11	5.48e-10	15.9692
ENSG00000109667	SLC2A9	1.3076	1.25e-11	5.52e-10	15.9601
ENSG00000166734	GOLM2	1.24743	1.29e-11	5.67e-10	15.9327
ENSG00000105656	ELL	1.29744	1.29e-11	5.69e-10	15.927
ENSG00000160392	C19orf47	1.23992	1.3e-11	5.7e-10	15.9223
ENSG00000204262	COL5A2	1.24321	1.35e-11	5.92e-10	15.8838
ENSG00000160563	MED27	1.21736	1.37e-11	5.97e-10	15.8736
ENSG00000064393	HIPK2	1.49268	1.54e-11	6.71e-10	15.7563
ENSG00000196235	SUPT5H	1.28403	1.56e-11	6.75e-10	15.7475
ENSG00000189013	KIR2DL4	1.26853	1.62e-11	7.02e-10	15.7074
ENSG00000143079	CTTNBP2NL	1.14649	1.63e-11	7.02e-10	15.705
ENSG00000185787	MORF4L1	1.25958	1.63e-11	7.03e-10	15.7015
ENSG00000143776	CDC42BPA	1.40929	1.65e-11	7.09e-10	15.6919
ENSG00000137100	DCTN3	1.24946	1.67e-11	7.17e-10	15.6784
ENSG00000102057	KCND1	1.30603	1.69e-11	7.22e-10	15.6694
ENSG00000168404	MLKL	1.67316	1.73e-11	7.37e-10	15.6474
ENSG00000160445	ZER1	1.28357	1.84e-11	7.85e-10	15.5844
ENSG00000167110	GOLGA2	1.29778	1.86e-11	7.89e-10	15.5757
ENSG00000203879	GDI1	1.38996	1.89e-11	8.01e-10	15.5585
ENSG00000115318	LOXL3	1.26093	1.98e-11	8.37e-10	15.5135
ENSG00000197140	ADAM32	1.2795	1.99e-11	8.37e-10	15.5117
ENSG00000168301	KCTD6	1.26387	2.03e-11	8.51e-10	15.4924
ENSG00000070010	UFD1	1.25648	2.03e-11	8.52e-10	15.4885
ENSG00000032444	PNPLA6	1.27164	2.06e-11	8.6e-10	15.4765
ENSG00000005486	RHBDD2	1.32042	2.07e-11	8.62e-10	15.4729
ENSG00000213533	STIMATE	1.32156	2.09e-11	8.71e-10	15.46
ENSG00000173482	PTPRM	1.67365	2.14e-11	8.88e-10	15.4395
ENSG00000178184	PARD6G	1.27211	2.18e-11	9.02e-10	15.4206
ENSG00000010704	HFE	1.42881	2.2e-11	9.06e-10	15.4136
ENSG00000103489	XYLT1	1.94828	2.24e-11	9.19e-10	15.3961
ENSG00000113161	HMGCR	1.31026	2.33e-11	9.53e-10	15.3584
ENSG00000017260	ATP2C1	1.28416	2.33e-11	9.55e-10	15.3549
ENSG00000109685	NSD2	2.40724	2.34e-11	9.55e-10	15.353
ENSG00000056998	GYG2	1.08716	2.36e-11	9.61e-10	15.3447
ENSG00000063180	CA11	1.38033	2.49e-11	1.01e-09	15.2919
ENSG00000165810	BTNL9	1.62515	2.56e-11	1.04e-09	15.2641
ENSG00000196876	SCN8A	1.33681	2.59e-11	1.05e-09	15.2536
ENSG00000123352	SPATS2	1.28325	2.6e-11	1.05e-09	15.252
ENSG00000100324	TAB1	1.3665	2.64e-11	1.07e-09	15.2345
ENSG00000205726	ITSN1	1.63201	2.68e-11	1.08e-09	15.2211
ENSG00000212916	MAP10	1.41109	2.72e-11	1.09e-09	15.2068
ENSG00000146555	SDK1	1.3682	2.72e-11	1.09e-09	15.2074
ENSG00000169047	IRS1	1.62204	2.73e-11	1.09e-09	15.2021
ENSG00000103005	USB1	1.28659	2.74e-11	1.09e-09	15.2013
ENSG00000105254	TBCB	1.27422	2.76e-11	1.1e-09	15.1933
ENSG00000010379	SLC6A13	1.33905	2.8e-11	1.11e-09	15.1801
ENSG00000123836	PFKFB2	1.87353	3.05e-11	1.21e-09	15.0953
ENSG00000105639	JAK3	1.70228	3.34e-11	1.32e-09	15.0075
ENSG00000071051	NCK2	1.38761	3.44e-11	1.36e-09	14.9796
ENSG00000186517	ARHGAP30	1.45454	3.5e-11	1.38e-09	14.9621
ENSG00000110274	CEP164	1.32888	3.6e-11	1.42e-09	14.9351
ENSG00000100258	LMF2	1.30299	3.66e-11	1.44e-09	14.9199
ENSG00000197046	SIGLEC15	1.16157	3.78e-11	1.48e-09	14.8893
ENSG00000103064	SLC7A6	1.37756	3.79e-11	1.48e-09	14.8864
ENSG00000120868	APAF1	1.37345	3.95e-11	1.54e-09	14.8457
ENSG00000187244	BCAM	1.33573	4.22e-11	1.64e-09	14.7823
ENSG00000174844	DNAH12	1.26404	4.31e-11	1.68e-09	14.7607
ENSG00000176463	SLCO3A1	2.34533	4.34e-11	1.68e-09	14.7546
ENSG00000133063	CHIT1	1.61517	4.42e-11	1.71e-09	14.7363
ENSG00000105397	TYK2	1.26332	4.45e-11	1.72e-09	14.7313
ENSG00000196189	SEMA4A	1.92002	4.49e-11	1.73e-09	14.7212
ENSG00000130725	UBE2M	1.18422	4.52e-11	1.74e-09	14.7168
ENSG00000135821	GLUL	1.94088	4.53e-11	1.74e-09	14.7135
ENSG00000112276	BVES	1.62983	4.6e-11	1.76e-09	14.6993
ENSG00000166743	ACSM1	1.1728	4.63e-11	1.77e-09	14.6932
ENSG00000136802	LRRC8A	1.31163	4.7e-11	1.79e-09	14.6772
ENSG00000104142	VPS18	1.26687	4.76e-11	1.81e-09	14.6662
ENSG00000187688	TRPV2	1.5542	4.86e-11	1.85e-09	14.645
ENSG00000116183	PAPPA2	1.13494	5.01e-11	1.9e-09	14.617
ENSG00000261221	ZNF865	1.23635	5.03e-11	1.9e-09	14.6123
ENSG00000196152	ZNF79	1.29518	5.07e-11	1.92e-09	14.6042
ENSG00000175130	MARCKSL1	1.91877	5.14e-11	1.94e-09	14.5907
ENSG00000072818	ACAP1	1.50795	5.28e-11	1.98e-09	14.566
ENSG00000101544	ADNP2	1.46827	5.29e-11	1.98e-09	14.564
ENSG00000099377	HSD3B7	1.60188	5.41e-11	2.03e-09	14.5418
ENSG00000179314	WSCD1	2.17355	5.46e-11	2.04e-09	14.5326
ENSG00000205209	SCGB2B2	1.22763	5.47e-11	2.04e-09	14.5316
ENSG00000170035	UBE2E3	1.25137	5.51e-11	2.05e-09	14.5239
ENSG00000182050	MGAT4C	2.04746	5.56e-11	2.07e-09	14.5152
ENSG00000042062	RIPOR3	1.61415	5.61e-11	2.08e-09	14.507
ENSG00000064932	SBNO2	1.5063	5.73e-11	2.12e-09	14.486
ENSG00000187048	CYP4A11	1.08676	5.73e-11	2.12e-09	14.4861
ENSG00000214097	SMCO1	1.14875	5.79e-11	2.14e-09	14.4757
ENSG00000179262	RAD23A	1.20258	5.99e-11	2.2e-09	14.4442
ENSG00000026559	KCNG1	1.08876	6.06e-11	2.23e-09	14.4325
ENSG00000114982	KANSL3	1.26198	6.12e-11	2.24e-09	14.4231
ENSG00000167523	SPATA33	1.28958	6.18e-11	2.26e-09	14.4134
ENSG00000148358	GPR107	1.26484	6.18e-11	2.26e-09	14.4128
ENSG00000106785	TRIM14	1.54332	6.19e-11	2.26e-09	14.4115
ENSG00000182054	IDH2	1.42507	6.41e-11	2.33e-09	14.3787
ENSG00000169230	PRELID1	1.22719	6.45e-11	2.34e-09	14.3713
ENSG00000042445	RETSAT	1.26887	6.54e-11	2.37e-09	14.3582
ENSG00000213853	EMP2	1.26639	6.64e-11	2.4e-09	14.3445
ENSG00000171124	FUT3	1.5967	6.68e-11	2.41e-09	14.3384
ENSG00000186469	GNG2	1.8447	6.69e-11	2.41e-09	14.3365
ENSG00000117602	RCAN3	1.53817	6.71e-11	2.41e-09	14.334
ENSG00000163697	APBB2	1.55305	6.84e-11	2.46e-09	14.3154
ENSG00000240891	PLCXD2	1.5753	6.89e-11	2.47e-09	14.3078
ENSG00000099949	LZTR1	1.3391	6.93e-11	2.48e-09	14.3032
ENSG00000135018	UBQLN1	1.22804	6.97e-11	2.49e-09	14.2966
ENSG00000135749	PCNX2	1.55105	7.06e-11	2.52e-09	14.284
ENSG00000147231	RADX	1.73571	7.1e-11	2.53e-09	14.2786
ENSG00000148356	LRSAM1	1.27118	7.12e-11	2.53e-09	14.2766
ENSG00000152669	CCNO	1.35892	7.13e-11	2.53e-09	14.2744
ENSG00000196642	RABL6	1.21302	7.23e-11	2.56e-09	14.2614
ENSG00000111305	GSG1	1.13718	7.24e-11	2.56e-09	14.2599
ENSG00000176871	WSB2	1.44924	7.55e-11	2.66e-09	14.2197
ENSG00000102931	ARL2BP	1.31042	7.64e-11	2.69e-09	14.2086
ENSG00000137802	MAPKBP1	1.31748	7.66e-11	2.69e-09	14.2062
ENSG00000102109	PCSK1N	2.36993	7.73e-11	2.71e-09	14.1973
ENSG00000086589	RBM22	1.24349	7.87e-11	2.75e-09	14.1801
ENSG00000169435	RASSF6	2.20261	7.88e-11	2.75e-09	14.1784
ENSG00000197653	DNAH10	1.28131	7.88e-11	2.75e-09	14.1789
ENSG00000103966	EHD4	1.58105	8.26e-11	2.88e-09	14.1323
ENSG00000137824	RMDN3	1.28258	8.33e-11	2.89e-09	14.1252
ENSG00000135048	CEMIP2	1.95564	8.38e-11	2.9e-09	14.1194
ENSG00000140471	LINS1	1.34109	8.38e-11	2.9e-09	14.1193
ENSG00000102978	POLR2C	1.24872	8.79e-11	3.03e-09	14.073
ENSG00000079215	SLC1A3	1.49225	8.81e-11	3.03e-09	14.0701
ENSG00000128872	TMOD2	1.51995	9.06e-11	3.11e-09	14.0438
ENSG00000129116	PALLD	1.4761	9.26e-11	3.18e-09	14.022
ENSG00000132912	DCTN4	1.23961	9.28e-11	3.18e-09	14.0206
ENSG00000138604	GLCE	1.38531	9.45e-11	3.23e-09	14.0028
ENSG00000181026	AEN	1.36214	9.61e-11	3.28e-09	13.9869
ENSG00000130311	DDA1	1.2141	9.75e-11	3.31e-09	13.9728
ENSG00000170482	SLC23A1	1.54006	1.01e-10	3.44e-09	13.9343
ENSG00000063127	SLC6A16	1.51857	1.06e-10	3.58e-09	13.8942
ENSG00000166377	ATP9B	1.28241	1.06e-10	3.58e-09	13.894
ENSG00000130222	GADD45G	1.96686	1.08e-10	3.65e-09	13.8718
ENSG00000170634	ACYP2	1.25881	1.08e-10	3.66e-09	13.8693
ENSG00000170113	NIPA1	1.42423	1.1e-10	3.69e-09	13.8577
ENSG00000204673	AKT1S1	1.23817	1.11e-10	3.72e-09	13.8491
ENSG00000157020	SEC13	1.24855	1.13e-10	3.79e-09	13.8293
ENSG00000166716	ZNF592	1.28536	1.14e-10	3.81e-09	13.8202
ENSG00000176531	PHLDB3	1.28319	1.14e-10	3.81e-09	13.8211
ENSG00000162909	CAPN2	1.68825	1.16e-10	3.85e-09	13.8083
ENSG00000135127	BICDL1	1.49568	1.21e-10	4e-09	13.7667
ENSG00000105520	PLPPR2	1.41854	1.23e-10	4.07e-09	13.7486
ENSG00000026508	CD44	3.19498	1.25e-10	4.12e-09	13.7353
ENSG00000196586	MYO6	1.56978	1.26e-10	4.17e-09	13.7227
ENSG00000112290	WASF1	1.32014	1.34e-10	4.4e-09	13.6687
ENSG00000102935	ZNF423	1.20361	1.34e-10	4.4e-09	13.6673
ENSG00000063322	MED29	1.23554	1.35e-10	4.44e-09	13.6572
ENSG00000113269	RNF130	2.31307	1.39e-10	4.56e-09	13.6281
ENSG00000136807	CDK9	1.28606	1.39e-10	4.56e-09	13.6282
ENSG00000070814	TCOF1	1.24317	1.43e-10	4.66e-09	13.6043
ENSG00000164088	PPM1M	1.37061	1.46e-10	4.76e-09	13.5832
ENSG00000101350	KIF3B	1.3041	1.49e-10	4.85e-09	13.562
ENSG00000149305	HTR3B	1.10942	1.49e-10	4.85e-09	13.5612
ENSG00000117281	CD160	1.26979	1.54e-10	4.98e-09	13.5331
ENSG00000137727	ARHGAP20	1.04671	1.59e-10	5.14e-09	13.5013
ENSG00000118873	RAB3GAP2	1.35571	1.61e-10	5.22e-09	13.4861
ENSG00000081026	MAGI3	1.65734	1.64e-10	5.29e-09	13.4688
ENSG00000132681	ATP1A4	1.07608	1.66e-10	5.35e-09	13.4575
ENSG00000162733	DDR2	1.45605	1.7e-10	5.44e-09	13.438
ENSG00000183638	RP1L1	1.11626	1.72e-10	5.51e-09	13.4241
ENSG00000131845	ZNF304	1.32634	1.76e-10	5.64e-09	13.3994
ENSG00000123384	LRP1	1.57662	1.8e-10	5.75e-09	13.3781
ENSG00000107021	TBC1D13	1.23587	1.82e-10	5.78e-09	13.3718
ENSG00000176909	MAMSTR	1.184	1.83e-10	5.82e-09	13.3633
ENSG00000133424	LARGE1	1.81572	1.85e-10	5.86e-09	13.3563
ENSG00000174996	KLC2	1.2901	1.85e-10	5.87e-09	13.352
ENSG00000107779	BMPR1A	1.45576	1.87e-10	5.92e-09	13.343
ENSG00000113194	FAF2	1.23756	1.89e-10	5.96e-09	13.334
ENSG00000061455	PRDM6	1.15936	1.94e-10	6.1e-09	13.3103
ENSG00000140795	MYLK3	1.35174	1.94e-10	6.12e-09	13.3061
ENSG00000196972	SMIM10L2B	1.23391	1.97e-10	6.18e-09	13.2942
ENSG00000198400	NTRK1	1.4573	2.02e-10	6.32e-09	13.2695
ENSG00000185033	SEMA4B	1.48049	2.03e-10	6.36e-09	13.2621
ENSG00000117298	ECE1	1.32881	2.04e-10	6.36e-09	13.26
ENSG00000185418	TARS3	1.31984	2.05e-10	6.39e-09	13.2547
ENSG00000186310	NAP1L3	1.46661	2.06e-10	6.4e-09	13.2515
ENSG00000158077	NLRP14	1.38148	2.13e-10	6.63e-09	13.2159
ENSG00000155974	GRIP1	1.48608	2.14e-10	6.65e-09	13.2115
ENSG00000239887	C1orf226	1.52133	2.15e-10	6.67e-09	13.2065
ENSG00000164287	CDC20B	1.1308	2.21e-10	6.83e-09	13.1831
ENSG00000143390	RFX5	1.28959	2.24e-10	6.91e-09	13.1693
ENSG00000166173	LARP6	1.65943	2.28e-10	7.02e-09	13.1517
ENSG00000182310	SPACA6	1.40359	2.28e-10	7.02e-09	13.1513
ENSG00000161647	MPP3	1.32352	2.32e-10	7.11e-09	13.1371
ENSG00000146826	MAP11	1.24212	2.33e-10	7.15e-09	13.1303
ENSG00000197774	EME2	1.29828	2.38e-10	7.3e-09	13.1094
ENSG00000142453	CARM1	1.21844	2.42e-10	7.4e-09	13.094
ENSG00000204160	ZDHHC18	1.37884	2.43e-10	7.42e-09	13.0907
ENSG00000109066	TMEM104	1.31883	2.55e-10	7.78e-09	13.0423
ENSG00000204524	ZNF805	1.26717	2.59e-10	7.87e-09	13.0299
ENSG00000139899	CBLN3	1.6159	2.6e-10	7.91e-09	13.0237
ENSG00000105402	NAPA	1.23004	2.7e-10	8.2e-09	12.9872
ENSG00000237515	SHISA9	1.22214	2.71e-10	8.2e-09	12.9865
ENSG00000063245	EPN1	1.24414	2.73e-10	8.25e-09	12.9783
ENSG00000023902	PLEKHO1	2.43352	2.76e-10	8.32e-09	12.9689
ENSG00000112964	GHR	1.18706	2.77e-10	8.35e-09	12.9635
ENSG00000166946	CCNDBP1	1.20403	2.78e-10	8.37e-09	12.9605
ENSG00000031823	RANBP3	1.22802	2.79e-10	8.38e-09	12.9578
ENSG00000096696	DSP	1.2085	2.8e-10	8.41e-09	12.9526
ENSG00000135248	FAM71F1	1.17786	2.82e-10	8.45e-09	12.9459
ENSG00000133056	PIK3C2B	1.51219	2.87e-10	8.59e-09	12.9292
ENSG00000141985	SH3GL1	1.25217	2.88e-10	8.61e-09	12.9247
ENSG00000164619	BMPER	1.22933	2.9e-10	8.66e-09	12.9182
ENSG00000070614	NDST1	1.35123	2.98e-10	8.87e-09	12.8937
ENSG00000142686	C1orf216	1.27713	3.01e-10	8.94e-09	12.8847
ENSG00000152556	PFKM	1.36391	3.03e-10	9.01e-09	12.8758
ENSG00000153093	ACOXL	1.64199	3.12e-10	9.24e-09	12.849
ENSG00000197150	ABCB8	1.33637	3.12e-10	9.24e-09	12.8476
ENSG00000093183	SEC22C	1.22217	3.15e-10	9.3e-09	12.8392
ENSG00000188124	OR2AG2	1.14297	3.15e-10	9.3e-09	12.8401
ENSG00000132612	VPS4A	1.24686	3.2e-10	9.43e-09	12.8239
ENSG00000181804	SLC9A9	1.58175	3.28e-10	9.66e-09	12.7996
ENSG00000087076	HSD17B14	1.49224	3.3e-10	9.66e-09	12.7961
ENSG00000130821	SLC6A8	1.48688	3.3e-10	9.66e-09	12.7942
ENSG00000213123	TCTEX1D2	1.37771	3.3e-10	9.66e-09	12.7963
ENSG00000166848	TERF2IP	1.34225	3.33e-10	9.73e-09	12.7867
ENSG00000172365	OR5B2	1.08514	3.4e-10	9.92e-09	12.7661
ENSG00000225697	SLC26A6	1.32479	3.42e-10	9.95e-09	12.7616
ENSG00000140398	NEIL1	1.61332	3.44e-10	1e-08	12.7553
ENSG00000137776	SLTM	1.22347	3.54e-10	1.03e-08	12.7258
ENSG00000100219	XBP1	1.51927	3.57e-10	1.04e-08	12.7186
ENSG00000164136	IL15	1.6098	3.59e-10	1.04e-08	12.7143
ENSG00000134153	EMC7	1.24513	3.62e-10	1.05e-08	12.7056
ENSG00000132640	BTBD3	2.55221	3.64e-10	1.05e-08	12.7007
ENSG00000068903	SIRT2	1.28641	3.66e-10	1.06e-08	12.6939
ENSG00000143294	PRCC	1.29764	3.69e-10	1.06e-08	12.6871
ENSG00000163602	RYBP	1.3416	3.7e-10	1.06e-08	12.6856
ENSG00000100336	APOL4	1.23331	3.83e-10	1.1e-08	12.6515
ENSG00000242866	STRC	1.45292	3.94e-10	1.13e-08	12.6242
ENSG00000105229	PIAS4	1.26788	3.98e-10	1.14e-08	12.6139
ENSG00000163235	TGFA	1.82571	4.04e-10	1.15e-08	12.5989
ENSG00000165474	GJB2	1.75441	4.09e-10	1.17e-08	12.5873
ENSG00000154153	RETREG1	1.31586	4.13e-10	1.17e-08	12.5784
ENSG00000152689	RASGRP3	1.9363	4.16e-10	1.18e-08	12.5725
ENSG00000140526	ABHD2	1.50324	4.23e-10	1.2e-08	12.5546
ENSG00000235034	C19orf81	2.41939	4.27e-10	1.21e-08	12.5466
ENSG00000179057	IGSF22	1.41688	4.29e-10	1.21e-08	12.5408
ENSG00000184983	NDUFA6	1.27018	4.29e-10	1.21e-08	12.5414
ENSG00000185129	PURA	1.30843	4.3e-10	1.21e-08	12.5396
ENSG00000226763	SRRM5	1.20281	4.34e-10	1.22e-08	12.5297
ENSG00000119383	PTPA	1.29013	4.43e-10	1.25e-08	12.5104
ENSG00000135709	KIAA0513	1.58569	4.45e-10	1.25e-08	12.5066
ENSG00000188467	SLC24A5	1.403	4.5e-10	1.26e-08	12.4956
ENSG00000069667	RORA	1.70475	4.53e-10	1.27e-08	12.4886
ENSG00000121671	CRY2	1.31341	4.59e-10	1.28e-08	12.4769
ENSG00000083838	ZNF446	1.23929	4.74e-10	1.32e-08	12.4447
ENSG00000169926	KLF13	1.37958	4.75e-10	1.32e-08	12.4436
ENSG00000154274	C4orf19	1.16522	4.83e-10	1.34e-08	12.4277
ENSG00000160877	NACC1	1.32392	4.94e-10	1.37e-08	12.4061
ENSG00000161217	PCYT1A	1.2342	4.96e-10	1.38e-08	12.401
ENSG00000135720	DYNC1LI2	1.40153	5e-10	1.39e-08	12.3934
ENSG00000162779	AXDND1	1.2444	5.02e-10	1.39e-08	12.3904
ENSG00000165868	HSPA12A	1.19699	5.04e-10	1.39e-08	12.3853
ENSG00000073578	SDHA	1.22258	5.11e-10	1.41e-08	12.3724
ENSG00000054523	KIF1B	1.30292	5.14e-10	1.42e-08	12.3668
ENSG00000102001	CACNA1F	1.21096	5.15e-10	1.42e-08	12.3644
ENSG00000133131	MORC4	1.27639	5.29e-10	1.45e-08	12.3389
ENSG00000144199	FAHD2B	1.2957	5.31e-10	1.46e-08	12.3351
ENSG00000186496	ZNF396	1.28811	5.31e-10	1.46e-08	12.3358
ENSG00000134138	MEIS2	2.46883	5.34e-10	1.46e-08	12.3311
ENSG00000148154	UGCG	1.3329	5.46e-10	1.49e-08	12.3085
ENSG00000150457	LATS2	1.4168	5.57e-10	1.52e-08	12.2895
ENSG00000084764	MAPRE3	1.40701	5.64e-10	1.54e-08	12.2771
ENSG00000072682	P4HA2	1.70769	5.73e-10	1.56e-08	12.2616
ENSG00000124275	MTRR	1.33084	5.77e-10	1.56e-08	12.256
ENSG00000159921	GNE	1.32123	5.77e-10	1.56e-08	12.2557
ENSG00000196549	MME	1.60953	5.82e-10	1.57e-08	12.2479
ENSG00000165626	BEND7	1.65289	5.85e-10	1.58e-08	12.2416
ENSG00000172575	RASGRP1	1.99424	5.87e-10	1.58e-08	12.2393
ENSG00000231389	HLA-DPA1	2.26175	6.01e-10	1.62e-08	12.2164
ENSG00000164068	RNF123	1.25	6.01e-10	1.62e-08	12.2156
ENSG00000168615	ADAM9	1.67475	6.12e-10	1.64e-08	12.1987
ENSG00000103932	RPAP1	1.27961	6.13e-10	1.64e-08	12.197
ENSG00000181220	ZNF746	1.22311	6.14e-10	1.64e-08	12.1964
ENSG00000100031	GGT1	1.67223	6.17e-10	1.65e-08	12.1916
ENSG00000167654	ATCAY	1.06562	6.17e-10	1.65e-08	12.1907
ENSG00000031081	ARHGAP31	1.4194	6.24e-10	1.66e-08	12.1796
ENSG00000184524	CEND1	1.45734	6.25e-10	1.66e-08	12.1787
ENSG00000091536	MYO15A	1.31067	6.25e-10	1.66e-08	12.1789
ENSG00000075891	PAX2	1.21843	6.25e-10	1.66e-08	12.178
ENSG00000114383	TUSC2	1.20886	6.25e-10	1.66e-08	12.1779
ENSG00000128268	MGAT3	1.96086	6.41e-10	1.7e-08	12.1547
ENSG00000169684	CHRNA5	1.41746	6.42e-10	1.7e-08	12.1531
ENSG00000070423	RNF126	1.28021	6.6e-10	1.74e-08	12.1267
ENSG00000105404	RABAC1	1.36205	6.63e-10	1.75e-08	12.1223
ENSG00000158169	FANCC	1.25846	6.63e-10	1.75e-08	12.1217
ENSG00000041880	PARP3	1.34667	6.74e-10	1.77e-08	12.1061
ENSG00000204653	ASPDH	1.4345	6.83e-10	1.79e-08	12.0924
ENSG00000244242	IFITM10	1.40675	6.85e-10	1.79e-08	12.0903
ENSG00000165655	ZNF503	1.31985	6.85e-10	1.79e-08	12.0902
ENSG00000140416	TPM1	1.44524	6.89e-10	1.8e-08	12.0849
ENSG00000198739	LRRTM3	1.12964	7.08e-10	1.85e-08	12.0586
ENSG00000170426	SDR9C7	1.04262	7.17e-10	1.87e-08	12.0467
ENSG00000182326	C1S	1.30533	7.22e-10	1.88e-08	12.04
ENSG00000250644	AC068580.4	1.53136	7.32e-10	1.9e-08	12.0268
ENSG00000225190	PLEKHM1	1.25349	7.34e-10	1.91e-08	12.0237
ENSG00000213203	GIMAP1	1.18316	7.37e-10	1.91e-08	12.0192
ENSG00000197451	HNRNPAB	1.25528	7.45e-10	1.93e-08	12.0087
ENSG00000214575	CPEB1	1.25441	7.71e-10	2e-08	11.9756
ENSG00000038358	EDC4	1.33351	7.75e-10	2e-08	11.9708
ENSG00000187800	PEAR1	1.51072	7.97e-10	2.06e-08	11.9438
ENSG00000148335	NTMT1	1.22467	8.34e-10	2.15e-08	11.9006
ENSG00000104972	LILRB1	1.92244	8.36e-10	2.15e-08	11.8976
ENSG00000127220	ABHD8	1.2946	8.4e-10	2.16e-08	11.893
ENSG00000182667	NTM	1.27918	8.53e-10	2.19e-08	11.8783
ENSG00000055813	CCDC85A	1.30382	8.58e-10	2.19e-08	11.8735
ENSG00000126012	KDM5C	1.29712	8.6e-10	2.2e-08	11.8708
ENSG00000162390	ACOT11	1.20099	8.85e-10	2.26e-08	11.8427
ENSG00000139625	MAP3K12	1.44439	8.98e-10	2.29e-08	11.8291
ENSG00000100104	SRRD	1.2606	9.03e-10	2.29e-08	11.8241
ENSG00000106546	AHR	1.7711	9.28e-10	2.36e-08	11.7969
ENSG00000196139	AKR1C3	1.53419	9.29e-10	2.36e-08	11.7961
ENSG00000075391	RASAL2	1.5758	9.42e-10	2.39e-08	11.7824
ENSG00000142444	TIMM29	1.22773	9.54e-10	2.41e-08	11.771
ENSG00000136878	USP20	1.25158	9.56e-10	2.41e-08	11.7684
ENSG00000104880	ARHGEF18	1.28563	9.66e-10	2.44e-08	11.7582
ENSG00000196123	KIAA0895L	1.45421	9.74e-10	2.45e-08	11.7507
ENSG00000140521	POLG	1.25444	1e-09	2.52e-08	11.7215
ENSG00000108576	SLC6A4	1.10758	1e-09	2.52e-08	11.721
ENSG00000090674	MCOLN1	1.29603	1.02e-09	2.55e-08	11.7078
ENSG00000163624	CDS1	1.32472	1.02e-09	2.56e-08	11.7043
ENSG00000136936	XPA	1.23612	1.03e-09	2.58e-08	11.694
ENSG00000180357	ZNF609	1.29816	1.04e-09	2.61e-08	11.6847
ENSG00000092096	SLC22A17	2.7123	1.05e-09	2.62e-08	11.6781
ENSG00000184984	CHRM5	1.09632	1.05e-09	2.62e-08	11.6778
ENSG00000183718	TRIM52	1.28813	1.06e-09	2.64e-08	11.6683
ENSG00000127824	TUBA4A	1.35319	1.07e-09	2.67e-08	11.6559
ENSG00000095303	PTGS1	1.53712	1.08e-09	2.69e-08	11.6489
ENSG00000106701	FSD1L	1.34219	1.1e-09	2.73e-08	11.6326
ENSG00000174837	ADGRE1	1.31539	1.11e-09	2.74e-08	11.6273
ENSG00000106123	EPHB6	1.22984	1.11e-09	2.74e-08	11.6251
ENSG00000062582	MRPS24	1.32129	1.12e-09	2.76e-08	11.6171
ENSG00000165376	CLDN2	1.13917	1.14e-09	2.8e-08	11.6015
ENSG00000133026	MYH10	1.40951	1.15e-09	2.82e-08	11.5945
ENSG00000168447	SCNN1B	1.922	1.17e-09	2.88e-08	11.5725
ENSG00000107372	ZFAND5	1.41183	1.22e-09	2.99e-08	11.5364
ENSG00000169760	NLGN1	1.2423	1.24e-09	3.05e-08	11.5145
ENSG00000104081	BMF	2.09503	1.26e-09	3.1e-08	11.4991
ENSG00000151729	SLC25A4	1.30021	1.28e-09	3.12e-08	11.4893
ENSG00000177301	KCNA2	1.57072	1.29e-09	3.16e-08	11.478
ENSG00000177181	RIMKLA	1.14707	1.3e-09	3.17e-08	11.4714
ENSG00000167202	TBC1D2B	1.37046	1.31e-09	3.19e-08	11.465
ENSG00000163930	BAP1	1.26179	1.31e-09	3.19e-08	11.4642
ENSG00000108960	MMD	1.39642	1.32e-09	3.2e-08	11.4582
ENSG00000136937	NCBP1	1.21536	1.32e-09	3.21e-08	11.4545
ENSG00000197565	COL4A6	1.56815	1.33e-09	3.22e-08	11.4514
ENSG00000143801	PSEN2	1.35069	1.34e-09	3.23e-08	11.4457
ENSG00000187231	SESTD1	1.68954	1.34e-09	3.24e-08	11.4415
ENSG00000180530	NRIP1	1.477	1.35e-09	3.24e-08	11.4395
ENSG00000160714	UBE2Q1	1.25798	1.39e-09	3.34e-08	11.4077
ENSG00000197753	LHFPL5	1.23273	1.39e-09	3.34e-08	11.4075
ENSG00000269755	AC008758.6	1.3161	1.41e-09	3.38e-08	11.3953
ENSG00000088854	C20orf194	1.29193	1.42e-09	3.39e-08	11.3907
ENSG00000154122	ANKH	1.54167	1.42e-09	3.4e-08	11.387
ENSG00000169018	FEM1B	1.32509	1.43e-09	3.42e-08	11.3818
ENSG00000196628	TCF4	1.98477	1.45e-09	3.46e-08	11.3693
ENSG00000162669	HFM1	1.197	1.45e-09	3.47e-08	11.3646
ENSG00000231738	TSPAN19	1.41283	1.46e-09	3.48e-08	11.3613
ENSG00000159176	CSRP1	1.29899	1.49e-09	3.54e-08	11.3432
ENSG00000267680	ZNF224	1.32586	1.51e-09	3.59e-08	11.3278
ENSG00000038382	TRIO	2.08386	1.53e-09	3.63e-08	11.3159
ENSG00000183032	SLC25A21	1.32378	1.53e-09	3.63e-08	11.3164
ENSG00000168610	STAT3	1.48854	1.55e-09	3.68e-08	11.301
ENSG00000110318	CEP126	1.44062	1.6e-09	3.79e-08	11.2703
ENSG00000223609	HBD	2.15956	1.61e-09	3.8e-08	11.2668
ENSG00000169194	IL13	1.29903	1.62e-09	3.82e-08	11.2616
ENSG00000198892	SHISA4	1.47061	1.67e-09	3.93e-08	11.2334
ENSG00000104164	BLOC1S6	1.25405	1.67e-09	3.94e-08	11.2289
ENSG00000165507	DEPP1	2.32425	1.68e-09	3.95e-08	11.2256
ENSG00000269190	FBXO17	1.28358	1.69e-09	3.98e-08	11.2178
ENSG00000187079	TEAD1	1.81153	1.7e-09	3.98e-08	11.216
ENSG00000140497	SCAMP2	1.25972	1.72e-09	4.02e-08	11.2045
ENSG00000127081	ZNF484	1.22335	1.73e-09	4.05e-08	11.1948
ENSG00000113262	GRM6	1.0364	1.73e-09	4.05e-08	11.1977
ENSG00000164305	CASP3	1.31214	1.75e-09	4.07e-08	11.1882
ENSG00000155962	CLIC2	1.7758	1.76e-09	4.11e-08	11.1787
ENSG00000115380	EFEMP1	2.5906	1.78e-09	4.15e-08	11.1676
ENSG00000083814	ZNF671	1.3242	1.8e-09	4.18e-08	11.1582
ENSG00000173366	AC097637.1	1.57377	1.81e-09	4.2e-08	11.1529
ENSG00000091513	TF	1.39107	1.81e-09	4.2e-08	11.1529
ENSG00000101290	CDS2	1.2965	1.83e-09	4.23e-08	11.1452
ENSG00000178951	ZBTB7A	1.30321	1.87e-09	4.31e-08	11.1246
ENSG00000148057	IDNK	1.32168	1.9e-09	4.37e-08	11.1086
ENSG00000106258	CYP3A5	1.25679	1.9e-09	4.37e-08	11.1074
ENSG00000100314	CABP7	1.07222	1.9e-09	4.37e-08	11.108
ENSG00000071553	ATP6AP1	1.36197	1.91e-09	4.39e-08	11.1023
ENSG00000176428	VPS37D	1.32138	1.91e-09	4.39e-08	11.1016
ENSG00000142949	PTPRF	1.53549	1.93e-09	4.43e-08	11.09
ENSG00000183696	UPP1	1.50229	1.93e-09	4.43e-08	11.0902
ENSG00000183762	KREMEN1	1.18166	1.93e-09	4.43e-08	11.0911
ENSG00000168036	CTNNB1	1.28527	1.94e-09	4.44e-08	11.085
ENSG00000145936	KCNMB1	1.11843	1.97e-09	4.51e-08	11.0703
ENSG00000105732	ZNF574	1.28925	1.99e-09	4.54e-08	11.0611
ENSG00000123612	ACVR1C	1.4752	2e-09	4.56e-08	11.0553
ENSG00000182308	DCAF4L1	1.19309	2.01e-09	4.58e-08	11.0503
ENSG00000197444	OGDHL	1.48154	2.02e-09	4.58e-08	11.0498
ENSG00000185634	SHC4	1.18644	2.02e-09	4.59e-08	11.0466
ENSG00000130244	FAM98C	1.25083	2.05e-09	4.63e-08	11.0355
ENSG00000143147	GPR161	1.16089	2.06e-09	4.65e-08	11.0293
ENSG00000139547	RDH16	1.13971	2.06e-09	4.65e-08	11.0298
ENSG00000099958	DERL3	1.59727	2.07e-09	4.67e-08	11.0244
ENSG00000055732	MCOLN3	1.14454	2.1e-09	4.74e-08	11.0084
ENSG00000121900	TMEM54	1.73046	2.12e-09	4.76e-08	11.0035
ENSG00000176919	C8G	1.29346	2.12e-09	4.77e-08	11.0005
ENSG00000130402	ACTN4	1.32918	2.14e-09	4.8e-08	10.9943
ENSG00000165280	VCP	1.25736	2.17e-09	4.87e-08	10.9768
ENSG00000084444	FAM234B	1.33865	2.18e-09	4.87e-08	10.9755
ENSG00000243477	NAA80	1.26589	2.21e-09	4.93e-08	10.9619
ENSG00000115317	HTRA2	1.24713	2.21e-09	4.94e-08	10.9602
ENSG00000151276	MAGI1	1.51213	2.23e-09	4.98e-08	10.9509
ENSG00000135052	GOLM1	1.51856	2.29e-09	5.11e-08	10.9252
ENSG00000147255	IGSF1	1.42033	2.31e-09	5.13e-08	10.9201
ENSG00000130413	STK33	1.40406	2.35e-09	5.22e-08	10.9021
ENSG00000135932	CAB39	1.24095	2.36e-09	5.23e-08	10.899
ENSG00000132434	LANCL2	1.28779	2.38e-09	5.27e-08	10.891
ENSG00000108819	PPP1R9B	1.31204	2.43e-09	5.38e-08	10.8701
ENSG00000164175	SLC45A2	1.08814	2.49e-09	5.5e-08	10.8476
ENSG00000240764	PCDHGC5	1.11923	2.52e-09	5.56e-08	10.8351
ENSG00000136717	BIN1	1.75266	2.57e-09	5.66e-08	10.8166
ENSG00000162426	SLC45A1	1.10114	2.58e-09	5.69e-08	10.8109
ENSG00000107738	VSIR	1.42081	2.62e-09	5.76e-08	10.7961
ENSG00000145555	MYO10	1.33047	2.62e-09	5.76e-08	10.7955
ENSG00000120306	CYSTM1	1.3258	2.62e-09	5.76e-08	10.7963
ENSG00000145198	VWA5B2	1.14724	2.64e-09	5.8e-08	10.7882
ENSG00000118900	UBN1	1.23409	2.67e-09	5.84e-08	10.7796
ENSG00000104859	CLASRP	1.25232	2.71e-09	5.93e-08	10.7639
ENSG00000173875	ZNF791	1.31351	2.75e-09	6e-08	10.7523
ENSG00000172594	SMPDL3A	1.66268	2.78e-09	6.07e-08	10.739
ENSG00000111729	CLEC4A	1.29985	2.84e-09	6.19e-08	10.7193
ENSG00000105894	PTN	1.57702	2.88e-09	6.27e-08	10.7058
ENSG00000119314	PTBP3	1.27768	2.89e-09	6.27e-08	10.7039
ENSG00000113212	PCDHB7	1.21028	2.92e-09	6.33e-08	10.6943
ENSG00000130956	HABP4	1.40453	2.94e-09	6.37e-08	10.6869
ENSG00000147224	PRPS1	1.29617	3.02e-09	6.54e-08	10.6597
ENSG00000125170	DOK4	1.55338	3.03e-09	6.55e-08	10.6574
ENSG00000117013	KCNQ4	1.12698	3.06e-09	6.62e-08	10.6463
ENSG00000141837	CACNA1A	1.50039	3.11e-09	6.71e-08	10.6317
ENSG00000164270	HTR4	1.30864	3.16e-09	6.82e-08	10.6159
ENSG00000131408	NR1H2	1.23593	3.18e-09	6.85e-08	10.6105
ENSG00000196935	SRGAP1	1.09832	3.21e-09	6.89e-08	10.6026
ENSG00000088926	F11	1.09617	3.21e-09	6.89e-08	10.6008
ENSG00000136826	KLF4	3.02827	3.22e-09	6.89e-08	10.5977
ENSG00000049759	NEDD4L	1.65786	3.22e-09	6.89e-08	10.6001
ENSG00000213023	SYT3	1.37852	3.22e-09	6.89e-08	10.6001
ENSG00000169031	COL4A3	1.45175	3.29e-09	7.02e-08	10.5769
ENSG00000006116	CACNG3	1.1441	3.29e-09	7.02e-08	10.5776
ENSG00000198853	RUSC2	1.26652	3.3e-09	7.02e-08	10.5765
ENSG00000186395	KRT10	1.32346	3.34e-09	7.1e-08	10.5647
ENSG00000072803	FBXW11	1.21244	3.36e-09	7.13e-08	10.5584
ENSG00000010322	NISCH	1.24703	3.37e-09	7.15e-08	10.5539
ENSG00000028528	SNX1	1.27278	3.42e-09	7.24e-08	10.5414
ENSG00000198218	QRICH1	1.23089	3.45e-09	7.29e-08	10.5336
ENSG00000131236	CAP1	1.30973	3.47e-09	7.33e-08	10.5256
ENSG00000161509	GRIN2C	1.19817	3.47e-09	7.33e-08	10.526
ENSG00000095383	TBC1D2	1.22889	3.49e-09	7.35e-08	10.522
ENSG00000159261	CLDN14	2.0009	3.5e-09	7.38e-08	10.5172
ENSG00000162722	TRIM58	1.39936	3.57e-09	7.5e-08	10.5005
ENSG00000224107	ETDB	1.18988	3.61e-09	7.58e-08	10.4892
ENSG00000090372	STRN4	1.21224	3.64e-09	7.64e-08	10.4804
ENSG00000149179	C11orf49	1.22315	3.66e-09	7.68e-08	10.4746
ENSG00000139926	FRMD6	1.84928	3.68e-09	7.7e-08	10.4695
ENSG00000089639	GMIP	1.29275	3.68e-09	7.7e-08	10.471
ENSG00000179222	MAGED1	1.41102	3.77e-09	7.87e-08	10.4476
ENSG00000178163	ZNF518B	1.46252	3.8e-09	7.93e-08	10.439
ENSG00000182957	SPATA13	1.44211	3.8e-09	7.93e-08	10.4398
ENSG00000153721	CNKSR3	1.04266	3.86e-09	8.04e-08	10.4237
ENSG00000155034	FBXL18	1.18344	3.92e-09	8.16e-08	10.4094
ENSG00000167550	RHEBL1	1.34762	3.95e-09	8.21e-08	10.4023
ENSG00000127948	POR	1.23099	3.95e-09	8.21e-08	10.4015
ENSG00000172554	SNTG2	1.60713	3.96e-09	8.21e-08	10.3984
ENSG00000161021	MAML1	1.28108	3.96e-09	8.21e-08	10.3985
ENSG00000068305	MEF2A	1.30563	3.97e-09	8.22e-08	10.3969
ENSG00000115275	MOGS	1.25131	3.99e-09	8.25e-08	10.3926
ENSG00000164070	HSPA4L	1.38178	4.08e-09	8.43e-08	10.3698
ENSG00000104824	HNRNPL	1.16761	4.1e-09	8.45e-08	10.3666
ENSG00000122367	LDB3	1.07282	4.17e-09	8.58e-08	10.3509
ENSG00000049860	HEXB	1.33553	4.23e-09	8.71e-08	10.3356
ENSG00000171840	NINJ2	1.38894	4.34e-09	8.92e-08	10.312
ENSG00000063244	U2AF2	1.17679	4.35e-09	8.94e-08	10.3082
ENSG00000188175	HEPACAM2	1.33134	4.38e-09	8.98e-08	10.3031
ENSG00000156983	BRPF1	1.24127	4.38e-09	8.98e-08	10.3017
ENSG00000171603	CLSTN1	1.27958	4.4e-09	9.01e-08	10.2982
ENSG00000114353	GNAI2	1.21246	4.47e-09	9.13e-08	10.2839
ENSG00000160710	ADAR	1.33502	4.5e-09	9.19e-08	10.2769
ENSG00000255339	AL133352.1	1.36086	4.51e-09	9.19e-08	10.2745
ENSG00000141338	ABCA8	1.15862	4.51e-09	9.19e-08	10.2748
ENSG00000120733	KDM3B	1.25334	4.53e-09	9.22e-08	10.2695
ENSG00000140519	RHCG	1.07627	4.53e-09	9.22e-08	10.2704
ENSG00000168487	BMP1	1.25842	4.56e-09	9.28e-08	10.2628
ENSG00000108798	ABI3	1.33367	4.57e-09	9.28e-08	10.2608
ENSG00000155324	GRAMD2B	1.65073	4.58e-09	9.28e-08	10.2599
ENSG00000104863	LIN7B	1.32761	4.66e-09	9.44e-08	10.2424
ENSG00000182718	ANXA2	1.42656	4.71e-09	9.54e-08	10.2319
ENSG00000153558	FBXL2	1.28582	4.73e-09	9.57e-08	10.2278
ENSG00000073711	PPP2R3A	1.18813	4.78e-09	9.65e-08	10.2185
ENSG00000090686	USP48	1.30824	4.84e-09	9.76e-08	10.2065
ENSG00000176401	EID2B	1.26557	4.85e-09	9.77e-08	10.2051
ENSG00000148842	CNNM2	1.2173	4.87e-09	9.8e-08	10.2004
ENSG00000134287	ARF3	1.30645	4.96e-09	9.97e-08	10.1829
ENSG00000116539	ASH1L	1.28793	4.96e-09	9.97e-08	10.1824
ENSG00000150712	MTMR12	1.26543	5.01e-09	1.01e-07	10.1733
ENSG00000131437	KIF3A	1.29454	5.09e-09	1.02e-07	10.1572
ENSG00000197208	SLC22A4	1.35426	5.1e-09	1.02e-07	10.156
ENSG00000077721	UBE2A	1.29611	5.19e-09	1.04e-07	10.1392
ENSG00000127314	RAP1B	1.27302	5.2e-09	1.04e-07	10.1381
ENSG00000255302	EID1	1.29115	5.29e-09	1.06e-07	10.1212
ENSG00000164841	TMEM74	1.33664	5.37e-09	1.07e-07	10.107
ENSG00000183323	CCDC125	1.2904	5.4e-09	1.08e-07	10.1008
ENSG00000166974	MAPRE2	1.51455	5.42e-09	1.08e-07	10.0969
ENSG00000134668	SPOCD1	1.11776	5.45e-09	1.08e-07	10.0919
ENSG00000158773	USF1	1.33039	5.58e-09	1.11e-07	10.0702
ENSG00000102387	TAF7L	1.14178	5.65e-09	1.12e-07	10.0576
ENSG00000188986	NELFB	1.20953	5.71e-09	1.13e-07	10.0469
ENSG00000089101	CFAP61	1.53599	5.72e-09	1.13e-07	10.0452
ENSG00000130734	ATG4D	1.24718	5.73e-09	1.13e-07	10.0447
ENSG00000137821	LRRC49	1.21621	5.73e-09	1.13e-07	10.0438
ENSG00000162734	PEA15	1.50474	5.78e-09	1.14e-07	10.0354
ENSG00000174574	AKIRIN1	1.21932	5.78e-09	1.14e-07	10.0362
ENSG00000129667	RHBDF2	1.33081	5.83e-09	1.15e-07	10.0276
ENSG00000166507	NDST2	1.21637	5.91e-09	1.16e-07	10.0142
ENSG00000140479	PCSK6	1.28165	6.04e-09	1.19e-07	9.99403
ENSG00000152291	TGOLN2	1.24126	6.08e-09	1.19e-07	9.98643
ENSG00000177051	FBXO46	1.32359	6.23e-09	1.22e-07	9.96342
ENSG00000181143	MUC16	1.13111	6.24e-09	1.22e-07	9.96186
ENSG00000144560	VGLL4	1.26805	6.25e-09	1.22e-07	9.96085
ENSG00000134769	DTNA	1.57606	6.3e-09	1.23e-07	9.95285
ENSG00000174697	LEP	1.03263	6.3e-09	1.23e-07	9.95261
ENSG00000180611	MB21D2	1.78022	6.38e-09	1.25e-07	9.94006
ENSG00000117758	STX12	1.28639	6.43e-09	1.25e-07	9.93378
ENSG00000108106	UBE2S	1.31366	6.46e-09	1.26e-07	9.9289
ENSG00000198837	DENND4B	1.32536	6.48e-09	1.26e-07	9.92601
ENSG00000135622	SEMA4F	1.36017	6.53e-09	1.27e-07	9.91785
ENSG00000188070	C11orf95	1.3403	6.56e-09	1.27e-07	9.91453
ENSG00000132122	SPATA6	1.1652	6.59e-09	1.28e-07	9.90903
ENSG00000106336	FBXO24	1.2134	6.76e-09	1.31e-07	9.8852
ENSG00000157014	TATDN2	1.21027	6.8e-09	1.32e-07	9.88005
ENSG00000170684	ZNF296	1.31305	6.85e-09	1.33e-07	9.87193
ENSG00000178761	FAM219B	1.25815	6.93e-09	1.34e-07	9.86109
ENSG00000148331	ASB6	1.19943	6.95e-09	1.34e-07	9.85832
ENSG00000114251	WNT5A	2.23638	6.98e-09	1.34e-07	9.85497
ENSG00000185662	SMIM23	1.27925	7e-09	1.35e-07	9.85094
ENSG00000019582	CD74	1.77919	7.12e-09	1.37e-07	9.83491
ENSG00000126870	DYNC2I1	1.27547	7.38e-09	1.42e-07	9.80043
ENSG00000119812	FAM98A	1.26416	7.4e-09	1.42e-07	9.79776
ENSG00000063587	ZNF275	1.43876	7.46e-09	1.43e-07	9.79035
ENSG00000143127	ITGA10	1.16758	7.52e-09	1.44e-07	9.78245
ENSG00000065518	NDUFB4	1.19286	7.55e-09	1.44e-07	9.77925
ENSG00000157985	AGAP1	1.56808	7.67e-09	1.47e-07	9.76361
ENSG00000165886	UBTD1	1.33878	7.67e-09	1.47e-07	9.76327
ENSG00000172362	OR5B12	1.07159	7.78e-09	1.48e-07	9.75019
ENSG00000167460	TPM4	1.50985	7.91e-09	1.51e-07	9.73342
ENSG00000184194	GPR173	1.2442	7.91e-09	1.51e-07	9.73394
ENSG00000103811	CTSH	2.12134	7.92e-09	1.51e-07	9.73233
ENSG00000125503	PPP1R12C	1.2185	8e-09	1.52e-07	9.72372
ENSG00000160446	ZDHHC12	1.29699	8.1e-09	1.54e-07	9.71106
ENSG00000127990	SGCE	2.03799	8.17e-09	1.55e-07	9.70348
ENSG00000039650	PNKP	1.2331	8.18e-09	1.55e-07	9.70154
ENSG00000146416	AIG1	1.32999	8.24e-09	1.56e-07	9.69453
ENSG00000169228	RAB24	1.30901	8.3e-09	1.57e-07	9.68742
ENSG00000102316	MAGED2	1.37468	8.37e-09	1.58e-07	9.67971
ENSG00000076864	RAP1GAP	1.31183	8.37e-09	1.58e-07	9.68016
ENSG00000221887	HMSD	1.28713	8.38e-09	1.58e-07	9.67842
ENSG00000175376	EIF1AD	1.26175	8.46e-09	1.59e-07	9.66948
ENSG00000167751	KLK2	1.40716	8.54e-09	1.61e-07	9.6605
ENSG00000104833	TUBB4A	1.34608	8.68e-09	1.63e-07	9.64494
ENSG00000204267	TAP2	1.30425	8.99e-09	1.69e-07	9.61115
ENSG00000146216	TTBK1	1.08225	9.03e-09	1.69e-07	9.60638
ENSG00000248592	STIMATE-MUSTN1	1.29686	9.04e-09	1.69e-07	9.60588
ENSG00000127511	SIN3B	1.25577	9.04e-09	1.69e-07	9.60516
ENSG00000173988	LRRC63	1.07821	9.06e-09	1.69e-07	9.60367
ENSG00000064726	BTBD1	1.18395	9.15e-09	1.71e-07	9.59405
ENSG00000136943	CTSV	1.15221	9.17e-09	1.71e-07	9.59184
ENSG00000103044	HAS3	1.18291	9.33e-09	1.74e-07	9.57554
ENSG00000205022	PABPN1L	1.34167	9.45e-09	1.76e-07	9.56315
ENSG00000267060	PTGES3L	1.18211	9.52e-09	1.77e-07	9.55584
ENSG00000218891	ZNF579	1.26455	9.55e-09	1.78e-07	9.5525
ENSG00000159322	ADPGK	1.19183	9.76e-09	1.81e-07	9.53164
ENSG00000119402	FBXW2	1.21828	9.8e-09	1.82e-07	9.5283
ENSG00000185630	PBX1	1.41254	9.84e-09	1.82e-07	9.52378
ENSG00000148396	SEC16A	1.2256	9.93e-09	1.84e-07	9.5158
ENSG00000067445	TRO	1.59902	9.99e-09	1.85e-07	9.50921
ENSG00000176973	FAM89B	1.35144	1.03e-08	1.91e-07	9.47725
ENSG00000100330	MTMR3	1.31619	1.04e-08	1.92e-07	9.47132
ENSG00000103226	NOMO3	1.28463	1.07e-08	1.97e-07	9.44312
ENSG00000166947	EPB42	1.25227	1.07e-08	1.97e-07	9.44293
ENSG00000147650	LRP12	1.56894	1.08e-08	1.99e-07	9.43036
ENSG00000110057	UNC93B1	1.37408	1.08e-08	1.99e-07	9.43108
ENSG00000131409	LRRC4B	1.09911	1.08e-08	1.99e-07	9.43266
ENSG00000176945	MUC20	1.39119	1.09e-08	2e-07	9.42325
ENSG00000185043	CIB1	1.25648	1.1e-08	2.02e-07	9.41385
ENSG00000105186	ANKRD27	1.23777	1.12e-08	2.04e-07	9.40379
ENSG00000186862	PDZD7	1.17025	1.12e-08	2.04e-07	9.40119
ENSG00000178573	MAF	2.25216	1.14e-08	2.07e-07	9.38421
ENSG00000187720	THSD4	1.05624	1.14e-08	2.07e-07	9.38549
ENSG00000104805	NUCB1	1.27098	1.14e-08	2.08e-07	9.37906
ENSG00000163374	YY1AP1	1.23665	1.16e-08	2.11e-07	9.36466
ENSG00000005238	FAM214B	1.31433	1.17e-08	2.12e-07	9.35784
ENSG00000176928	GCNT4	1.47749	1.17e-08	2.13e-07	9.35593
ENSG00000175309	PHYKPL	1.25451	1.18e-08	2.14e-07	9.34777
ENSG00000171914	TLN2	1.5011	1.19e-08	2.15e-07	9.34493
ENSG00000181240	SLC25A41	1.21412	1.19e-08	2.15e-07	9.34348
ENSG00000122779	TRIM24	1.26495	1.21e-08	2.18e-07	9.32723
ENSG00000125378	BMP4	1.98814	1.22e-08	2.19e-07	9.32111
ENSG00000069869	NEDD4	1.34408	1.22e-08	2.19e-07	9.32102
ENSG00000069849	ATP1B3	1.387	1.22e-08	2.2e-07	9.31545
ENSG00000154978	VOPP1	1.36889	1.24e-08	2.23e-07	9.3045
ENSG00000133059	DSTYK	1.23838	1.27e-08	2.29e-07	9.2768
ENSG00000141127	PRPSAP2	1.33571	1.28e-08	2.3e-07	9.27089
ENSG00000162543	UBXN10	1.16715	1.28e-08	2.3e-07	9.27077
ENSG00000117472	TSPAN1	1.31405	1.29e-08	2.31e-07	9.26466
ENSG00000105088	OLFM2	1.12392	1.29e-08	2.31e-07	9.26749
ENSG00000154229	PRKCA	1.52206	1.3e-08	2.32e-07	9.25745
ENSG00000135424	ITGA7	1.36725	1.3e-08	2.32e-07	9.25821
ENSG00000164066	INTU	1.27558	1.31e-08	2.33e-07	9.25264
ENSG00000130827	PLXNA3	1.53164	1.31e-08	2.34e-07	9.25074
ENSG00000077463	SIRT6	1.21797	1.33e-08	2.37e-07	9.23469
ENSG00000081052	COL4A4	1.35376	1.34e-08	2.38e-07	9.23024
ENSG00000197321	SVIL	1.85848	1.34e-08	2.39e-07	9.22425
ENSG00000130396	AFDN	1.65165	1.34e-08	2.39e-07	9.22386
ENSG00000159217	IGF2BP1	1.13394	1.35e-08	2.4e-07	9.22163
ENSG00000135956	TMEM127	1.25484	1.37e-08	2.43e-07	9.20807
ENSG00000089169	RPH3A	2.06185	1.39e-08	2.47e-07	9.19107
ENSG00000268533	AC003002.2	1.24016	1.39e-08	2.47e-07	9.19143
ENSG00000161243	FBXO27	1.35017	1.41e-08	2.49e-07	9.17942
ENSG00000118276	B4GALT6	1.18447	1.41e-08	2.49e-07	9.18092
ENSG00000079805	DNM2	1.20479	1.42e-08	2.5e-07	9.17369
ENSG00000140511	HAPLN3	1.61503	1.42e-08	2.51e-07	9.16982
ENSG00000168824	NSG1	1.37441	1.43e-08	2.52e-07	9.16529
ENSG00000164896	FASTK	1.22691	1.44e-08	2.53e-07	9.15987
ENSG00000122507	BBS9	1.34195	1.45e-08	2.56e-07	9.14858
ENSG00000143322	ABL2	1.25151	1.45e-08	2.56e-07	9.149
ENSG00000105329	TGFB1	1.33924	1.46e-08	2.57e-07	9.14428
ENSG00000138175	ARL3	1.33812	1.47e-08	2.57e-07	9.14068
ENSG00000183760	ACP7	1.08443	1.47e-08	2.57e-07	9.14154
ENSG00000076641	PAG1	1.75091	1.48e-08	2.59e-07	9.13038
ENSG00000126368	NR1D1	1.58111	1.48e-08	2.59e-07	9.13026
ENSG00000104814	MAP4K1	1.26628	1.48e-08	2.59e-07	9.13059
ENSG00000185245	GP1BA	1.16274	1.48e-08	2.59e-07	9.1341
ENSG00000151338	MIPOL1	1.24381	1.49e-08	2.6e-07	9.12425
ENSG00000148200	NR6A1	1.2132	1.49e-08	2.6e-07	9.12452
ENSG00000173821	RNF213	1.43375	1.5e-08	2.61e-07	9.12103
ENSG00000158023	CFAP251	1.15756	1.51e-08	2.64e-07	9.10971
ENSG00000100027	YPEL1	1.30194	1.54e-08	2.67e-07	9.09414
ENSG00000250021	ARPIN-AP3S2	1.29505	1.54e-08	2.67e-07	9.09593
ENSG00000082397	EPB41L3	1.50617	1.55e-08	2.68e-07	9.08993
ENSG00000153317	ASAP1	1.2597	1.56e-08	2.7e-07	9.08121
ENSG00000005194	CIAPIN1	1.23076	1.56e-08	2.7e-07	9.08426
ENSG00000187605	TET3	1.22543	1.56e-08	2.7e-07	9.08116
ENSG00000148735	PLEKHS1	1.26892	1.58e-08	2.73e-07	9.0687
ENSG00000105568	PPP2R1A	1.20167	1.58e-08	2.73e-07	9.06957
ENSG00000163462	TRIM46	1.29661	1.59e-08	2.74e-07	9.06593
ENSG00000158882	TOMM40L	1.24603	1.6e-08	2.76e-07	9.05663
ENSG00000135519	KCNH3	1.23938	1.6e-08	2.76e-07	9.05784
ENSG00000150676	CCDC83	1.04695	1.6e-08	2.76e-07	9.05733
ENSG00000146063	TRIM41	1.21788	1.61e-08	2.77e-07	9.05075
ENSG00000136378	ADAMTS7	1.11449	1.62e-08	2.77e-07	9.04805
ENSG00000133687	TMTC1	1.37452	1.63e-08	2.8e-07	9.0375
ENSG00000128266	GNAZ	1.31828	1.63e-08	2.8e-07	9.03823
ENSG00000167657	DAPK3	1.19339	1.67e-08	2.86e-07	9.01712
ENSG00000105649	RAB3A	1.34782	1.69e-08	2.9e-07	9.002
ENSG00000188368	PRR19	1.14351	1.69e-08	2.9e-07	9.00376
ENSG00000128245	YWHAH	1.36342	1.7e-08	2.9e-07	8.99879
ENSG00000241935	HOGA1	1.32935	1.7e-08	2.9e-07	8.99765
ENSG00000186575	NF2	1.25875	1.7e-08	2.9e-07	8.99727
ENSG00000183091	NEB	2.09146	1.72e-08	2.93e-07	8.98648
ENSG00000182742	HOXB4	1.32233	1.72e-08	2.94e-07	8.98507
ENSG00000163006	CCDC138	1.31483	1.73e-08	2.95e-07	8.98042
ENSG00000011198	ABHD5	1.29137	1.74e-08	2.95e-07	8.978
ENSG00000122912	SLC25A16	1.28088	1.74e-08	2.96e-07	8.97429
ENSG00000168701	TMEM208	1.27578	1.75e-08	2.96e-07	8.97252
ENSG00000156966	B3GNT7	1.15487	1.76e-08	2.98e-07	8.96788
ENSG00000072364	AFF4	1.29909	1.77e-08	3e-07	8.96093
ENSG00000106290	TAF6	1.26061	1.83e-08	3.1e-07	8.92619
ENSG00000164989	CCDC171	1.66402	1.84e-08	3.11e-07	8.92469
ENSG00000069974	RAB27A	1.3385	1.84e-08	3.11e-07	8.9225
ENSG00000067798	NAV3	1.27663	1.84e-08	3.11e-07	8.92123
ENSG00000006837	CDKL3	1.17554	1.84e-08	3.11e-07	8.92055
ENSG00000169604	ANTXR1	1.30123	1.85e-08	3.12e-07	8.91732
ENSG00000111737	RAB35	1.305	1.87e-08	3.14e-07	8.90823
ENSG00000180953	ST20	1.30719	1.88e-08	3.16e-07	8.90263
ENSG00000115762	PLEKHB2	1.27869	1.88e-08	3.16e-07	8.90257
ENSG00000205838	TTC23L	1.18399	1.89e-08	3.17e-07	8.89864
ENSG00000011009	LYPLA2	1.19101	1.9e-08	3.18e-07	8.89448
ENSG00000204869	IGFL4	1.16178	1.9e-08	3.19e-07	8.88979
ENSG00000090924	PLEKHG2	1.62356	1.91e-08	3.2e-07	8.88555
ENSG00000171314	PGAM1	1.18474	1.92e-08	3.21e-07	8.88341
ENSG00000165509	MAGEC3	2.49108	1.93e-08	3.23e-07	8.87508
ENSG00000006453	BAIAP2L1	1.37839	1.93e-08	3.23e-07	8.87466
ENSG00000140939	NOL3	1.40322	1.94e-08	3.24e-07	8.87038
ENSG00000272916	AC022400.5	1.1784	1.95e-08	3.26e-07	8.86459
ENSG00000120328	PCDHB12	1.13841	1.99e-08	3.31e-07	8.84919
ENSG00000172175	MALT1	1.35754	2e-08	3.33e-07	8.8408
ENSG00000117682	DHDDS	1.26073	2e-08	3.33e-07	8.84212
ENSG00000131042	LILRB2	1.44421	2.04e-08	3.38e-07	8.82598
ENSG00000077942	FBLN1	1.17503	2.04e-08	3.38e-07	8.82204
ENSG00000005981	ASB4	1.11038	2.04e-08	3.38e-07	8.82303
ENSG00000110002	VWA5A	1.63025	2.09e-08	3.46e-07	8.80095
ENSG00000198832	SELENOM	1.56149	2.09e-08	3.46e-07	8.79929
ENSG00000136856	SLC2A8	1.22151	2.12e-08	3.5e-07	8.78759
ENSG00000198929	NOS1AP	1.31729	2.14e-08	3.53e-07	8.77682
ENSG00000158604	TMED4	1.15941	2.15e-08	3.54e-07	8.7732
ENSG00000165006	UBAP1	1.19877	2.18e-08	3.6e-07	8.75808
ENSG00000214021	TTLL3	1.33652	2.21e-08	3.63e-07	8.74595
ENSG00000130147	SH3BP4	1.22013	2.21e-08	3.63e-07	8.7479
ENSG00000027847	B4GALT7	1.24378	2.22e-08	3.65e-07	8.74117
ENSG00000230797	YY2	1.18791	2.23e-08	3.65e-07	8.73979
ENSG00000170276	HSPB2	1.05179	2.25e-08	3.68e-07	8.73159
ENSG00000143479	DYRK3	1.30146	2.27e-08	3.71e-07	8.72265
ENSG00000075826	SEC31B	1.32647	2.34e-08	3.82e-07	8.69342
ENSG00000173402	DAG1	1.24482	2.35e-08	3.84e-07	8.68908
ENSG00000106397	PLOD3	1.25394	2.36e-08	3.85e-07	8.68371
ENSG00000101004	NINL	1.54061	2.37e-08	3.86e-07	8.68058
ENSG00000260007	AC107871.1	1.45037	2.37e-08	3.86e-07	8.67925
ENSG00000189369	GSPT2	1.3247	2.37e-08	3.86e-07	8.68106
ENSG00000184454	NCMAP	1.53777	2.38e-08	3.88e-07	8.67502
ENSG00000159069	FBXW5	1.22463	2.39e-08	3.88e-07	8.67372
ENSG00000186591	UBE2H	1.26364	2.39e-08	3.89e-07	8.6709
ENSG00000174177	CTU2	1.2718	2.4e-08	3.9e-07	8.6661
ENSG00000198887	SMC5	1.22717	2.42e-08	3.92e-07	8.66107
ENSG00000239732	TLR9	1.49815	2.42e-08	3.93e-07	8.65888
ENSG00000104894	CD37	1.63389	2.43e-08	3.93e-07	8.65603
ENSG00000006007	GDE1	1.17128	2.44e-08	3.94e-07	8.65294
ENSG00000115325	DOK1	1.30254	2.44e-08	3.95e-07	8.65058
ENSG00000171159	C9orf16	1.22138	2.47e-08	3.98e-07	8.64183
ENSG00000109819	PPARGC1A	1.83268	2.5e-08	4.03e-07	8.62891
ENSG00000243789	JMJD7	1.29883	2.5e-08	4.04e-07	8.6268
ENSG00000153347	FAM81B	1.23743	2.57e-08	4.15e-07	8.60097
ENSG00000205045	SLFN12L	1.39898	2.59e-08	4.18e-07	8.59292
ENSG00000183580	FBXL7	1.40373	2.66e-08	4.28e-07	8.56936
ENSG00000044115	CTNNA1	1.22819	2.67e-08	4.3e-07	8.56373
ENSG00000108852	MPP2	1.22754	2.73e-08	4.39e-07	8.54307
ENSG00000175455	CCDC14	1.46094	2.79e-08	4.48e-07	8.52319
ENSG00000129514	FOXA1	1.49208	2.83e-08	4.53e-07	8.51044
ENSG00000174579	MSL2	1.26378	2.87e-08	4.59e-07	8.49607
ENSG00000169083	AR	1.1119	2.88e-08	4.61e-07	8.49175
ENSG00000139194	RBP5	1.37116	2.89e-08	4.61e-07	8.48986
ENSG00000027075	PRKCH	1.23809	2.89e-08	4.61e-07	8.49037
ENSG00000131116	ZNF428	1.22333	2.92e-08	4.66e-07	8.47941
ENSG00000090905	TNRC6A	1.2809	2.93e-08	4.67e-07	8.47517
ENSG00000181061	HIGD1A	1.27045	2.93e-08	4.67e-07	8.4747
ENSG00000176454	LPCAT4	1.32898	2.96e-08	4.7e-07	8.46686
ENSG00000162723	SLAMF9	1.16267	2.96e-08	4.7e-07	8.46683
ENSG00000168243	GNG4	1.0442	2.99e-08	4.74e-07	8.45782
ENSG00000128595	CALU	1.26888	3.07e-08	4.87e-07	8.43083
ENSG00000243449	C4orf48	1.51326	3.09e-08	4.9e-07	8.424
ENSG00000114923	SLC4A3	1.08015	3.1e-08	4.9e-07	8.42324
ENSG00000197006	METTL9	1.22966	3.13e-08	4.94e-07	8.41395
ENSG00000143995	MEIS1	1.43165	3.17e-08	5.01e-07	8.39973
ENSG00000161544	CYGB	1.24309	3.17e-08	5.01e-07	8.39942
ENSG00000188021	UBQLN2	1.25917	3.21e-08	5.06e-07	8.38915
ENSG00000103381	CPPED1	1.37203	3.22e-08	5.07e-07	8.38685
ENSG00000106565	TMEM176B	1.84117	3.25e-08	5.11e-07	8.3774
ENSG00000165233	CARD19	1.2888	3.26e-08	5.13e-07	8.37318
ENSG00000124143	ARHGAP40	1.13297	3.27e-08	5.13e-07	8.37214
ENSG00000126247	CAPNS1	1.18882	3.3e-08	5.18e-07	8.36295
ENSG00000143774	GUK1	1.23161	3.34e-08	5.24e-07	8.35129
ENSG00000154263	ABCA10	1.33975	3.36e-08	5.26e-07	8.34551
ENSG00000137691	CFAP300	1.04197	3.39e-08	5.31e-07	8.33631
ENSG00000165688	PMPCA	1.19314	3.45e-08	5.4e-07	8.31965
ENSG00000105197	TIMM50	1.17082	3.45e-08	5.4e-07	8.31832
ENSG00000172260	NEGR1	1.21644	3.46e-08	5.41e-07	8.3159
ENSG00000109956	B3GAT1	1.06373	3.54e-08	5.53e-07	8.29364
ENSG00000115904	SOS1	1.31144	3.55e-08	5.54e-07	8.29167
ENSG00000105472	CLEC11A	1.57735	3.63e-08	5.65e-07	8.27057
ENSG00000181826	RELL1	1.3945	3.63e-08	5.65e-07	8.27185
ENSG00000077585	GPR137B	1.38071	3.63e-08	5.65e-07	8.26973
ENSG00000166866	MYO1A	1.13398	3.66e-08	5.7e-07	8.26202
ENSG00000121281	ADCY7	1.34811	3.75e-08	5.82e-07	8.23994
ENSG00000198952	SMG5	1.24528	3.77e-08	5.85e-07	8.23341
ENSG00000213316	LTC4S	1.51876	3.78e-08	5.86e-07	8.23178
ENSG00000147526	TACC1	1.65721	3.79e-08	5.86e-07	8.22931
ENSG00000161036	LRWD1	1.33933	3.79e-08	5.86e-07	8.22971
ENSG00000105996	HOXA2	1.09136	3.8e-08	5.87e-07	8.22752
ENSG00000136205	TNS3	1.50248	3.84e-08	5.93e-07	8.21651
ENSG00000122859	NEUROG3	1.31779	3.84e-08	5.93e-07	8.21666
ENSG00000178567	EPM2AIP1	1.21453	3.85e-08	5.93e-07	8.21538
ENSG00000106348	IMPDH1	1.26416	3.86e-08	5.94e-07	8.21282
ENSG00000239474	KLHL41	1.16751	3.9e-08	6.01e-07	8.2007
ENSG00000162910	MRPL55	1.27448	3.96e-08	6.09e-07	8.18625
ENSG00000176148	TCP11L1	1.27867	4.03e-08	6.19e-07	8.17029
ENSG00000078295	ADCY2	1.15555	4.04e-08	6.2e-07	8.16892
ENSG00000128271	ADORA2A	1.42636	4.05e-08	6.21e-07	8.1659
ENSG00000106636	YKT6	1.2209	4.06e-08	6.22e-07	8.16294
ENSG00000147509	RGS20	1.39855	4.08e-08	6.25e-07	8.15873
ENSG00000164574	GALNT10	1.33809	4.11e-08	6.29e-07	8.1521
ENSG00000175166	PSMD2	1.20913	4.12e-08	6.3e-07	8.14865
ENSG00000126861	OMG	1.28057	4.13e-08	6.3e-07	8.14785
ENSG00000152104	PTPN14	1.07394	4.15e-08	6.34e-07	8.14169
ENSG00000144635	DYNC1LI1	1.18611	4.17e-08	6.36e-07	8.13722
ENSG00000176204	LRRTM4	1.24857	4.19e-08	6.39e-07	8.13292
ENSG00000198742	SMURF1	1.33832	4.2e-08	6.39e-07	8.13148
ENSG00000171604	CXXC5	1.28667	4.21e-08	6.41e-07	8.12818
ENSG00000142396	ERVK3-1	1.16254	4.23e-08	6.42e-07	8.1251
ENSG00000119396	RAB14	1.19783	4.24e-08	6.44e-07	8.1222
ENSG00000104852	SNRNP70	1.27323	4.25e-08	6.45e-07	8.12024
ENSG00000136574	GATA4	1.12596	4.26e-08	6.46e-07	8.11705
ENSG00000139998	RAB15	1.66703	4.28e-08	6.48e-07	8.11337
ENSG00000127540	UQCR11	1.22749	4.33e-08	6.54e-07	8.10265
ENSG00000149480	MTA2	1.23562	4.36e-08	6.59e-07	8.0954
ENSG00000162139	NEU3	1.40817	4.38e-08	6.61e-07	8.09145
ENSG00000161202	DVL3	1.20957	4.38e-08	6.61e-07	8.09055
ENSG00000136535	TBR1	1.0614	4.48e-08	6.76e-07	8.06797
ENSG00000171456	ASXL1	1.29611	4.52e-08	6.81e-07	8.05992
ENSG00000107036	RIC1	1.25176	4.54e-08	6.83e-07	8.05573
ENSG00000101335	MYL9	1.60007	4.59e-08	6.9e-07	8.04525
ENSG00000182287	AP1S2	1.5486	4.6e-08	6.91e-07	8.0443
ENSG00000152767	FARP1	1.36993	4.61e-08	6.93e-07	8.04055
ENSG00000135976	ANKRD36	1.33056	4.62e-08	6.93e-07	8.039
ENSG00000196220	SRGAP3	1.2977	4.63e-08	6.93e-07	8.03776
ENSG00000149926	TLCD3B	1.17754	4.63e-08	6.93e-07	8.03799
ENSG00000125629	INSIG2	1.30203	4.64e-08	6.94e-07	8.03582
ENSG00000189420	ZFP92	1.20736	4.64e-08	6.94e-07	8.03441
ENSG00000064309	CDON	1.17605	4.75e-08	7.1e-07	8.01186
ENSG00000171206	TRIM8	1.29163	4.78e-08	7.13e-07	8.00746
ENSG00000203734	ECT2L	1.11462	4.79e-08	7.15e-07	8.00382
ENSG00000135842	NIBAN1	1.69762	4.91e-08	7.31e-07	7.98105
ENSG00000075624	ACTB	1.29639	4.91e-08	7.31e-07	7.98178
ENSG00000073331	ALPK1	1.29158	4.94e-08	7.34e-07	7.97598
ENSG00000058404	CAMK2B	1.18127	4.94e-08	7.34e-07	7.97594
ENSG00000117461	PIK3R3	1.4635	4.96e-08	7.38e-07	7.9706
ENSG00000164244	PRRC1	1.23029	4.97e-08	7.38e-07	7.96847
ENSG00000160145	KALRN	1.13197	4.97e-08	7.38e-07	7.96887
ENSG00000137193	PIM1	1.74123	5e-08	7.41e-07	7.96284
ENSG00000168269	FOXI1	1.11789	5e-08	7.41e-07	7.96289
ENSG00000248099	INSL3	1.28538	5.01e-08	7.42e-07	7.96162
ENSG00000060237	WNK1	1.31243	5.06e-08	7.47e-07	7.95311
ENSG00000136925	TSTD2	1.26553	5.06e-08	7.48e-07	7.95173
ENSG00000111424	VDR	1.36619	5.09e-08	7.51e-07	7.94698
ENSG00000142459	EVI5L	1.25072	5.15e-08	7.59e-07	7.93458
ENSG00000106993	CDC37L1	1.22679	5.15e-08	7.59e-07	7.93463
ENSG00000137815	RTF1	1.20892	5.15e-08	7.59e-07	7.93455
ENSG00000158457	TSPAN33	1.5979	5.22e-08	7.68e-07	7.92177
ENSG00000239382	ALKBH6	1.21424	5.25e-08	7.72e-07	7.91644
ENSG00000179363	TMEM31	1.13219	5.25e-08	7.72e-07	7.91674
ENSG00000146242	TPBG	1.82407	5.28e-08	7.75e-07	7.91184
ENSG00000166136	NDUFB8	1.16147	5.29e-08	7.76e-07	7.9092
ENSG00000197969	VPS13A	1.32036	5.3e-08	7.77e-07	7.90772
ENSG00000101337	TM9SF4	1.18926	5.31e-08	7.77e-07	7.90662
ENSG00000173517	PEAK1	1.40088	5.35e-08	7.83e-07	7.89885
ENSG00000159348	CYB5R1	1.25612	5.4e-08	7.9e-07	7.88909
ENSG00000124243	BCAS4	1.53318	5.43e-08	7.93e-07	7.885
ENSG00000137817	PARP6	1.20599	5.49e-08	8.01e-07	7.87441
ENSG00000123728	RAP2C	1.30087	5.52e-08	8.05e-07	7.86959
ENSG00000111816	FRK	1.22993	5.54e-08	8.07e-07	7.86601
ENSG00000132563	REEP2	1.23791	5.56e-08	8.1e-07	7.86182
ENSG00000166268	MYRFL	1.24558	5.61e-08	8.16e-07	7.85366
ENSG00000184313	MROH7	1.13675	5.61e-08	8.16e-07	7.85283
ENSG00000004777	ARHGAP33	1.34266	5.67e-08	8.24e-07	7.84303
ENSG00000140563	MCTP2	1.40631	5.72e-08	8.29e-07	7.83543
ENSG00000015285	WAS	1.22764	5.72e-08	8.29e-07	7.83468
ENSG00000171877	FRMD5	1.09756	5.72e-08	8.29e-07	7.83521
ENSG00000118217	ATF6	1.36082	5.98e-08	8.67e-07	7.79133
ENSG00000205250	E2F4	1.23205	6e-08	8.69e-07	7.78895
ENSG00000142798	HSPG2	1.60523	6.01e-08	8.69e-07	7.78738
ENSG00000142178	SIK1	1.55893	6.05e-08	8.74e-07	7.78113
ENSG00000214140	PRCD	1.52556	6.05e-08	8.74e-07	7.78165
ENSG00000113300	CNOT6	1.21513	6.13e-08	8.84e-07	7.76902
ENSG00000172954	LCLAT1	1.20758	6.14e-08	8.85e-07	7.76724
ENSG00000180667	YOD1	1.44062	6.18e-08	8.91e-07	7.7604
ENSG00000005020	SKAP2	1.44628	6.2e-08	8.93e-07	7.75728
ENSG00000121057	AKAP1	1.36453	6.21e-08	8.94e-07	7.75543
ENSG00000160471	COX6B2	1.22954	6.25e-08	8.98e-07	7.74905
ENSG00000155329	ZCCHC10	1.17004	6.25e-08	8.98e-07	7.74959
ENSG00000092978	GPATCH2	1.32069	6.26e-08	8.98e-07	7.74805
ENSG00000146587	RBAK	1.20971	6.26e-08	8.98e-07	7.74801
ENSG00000083067	TRPM3	1.42562	6.29e-08	9.02e-07	7.74301
ENSG00000134996	OSTF1	1.26212	6.31e-08	9.03e-07	7.74079
ENSG00000113384	GOLPH3	1.21935	6.31e-08	9.03e-07	7.74082
ENSG00000100239	PPP6R2	1.20812	6.33e-08	9.04e-07	7.73824
ENSG00000196337	CGB7	1.08305	6.36e-08	9.09e-07	7.73268
ENSG00000243696	AC006254.1	1.26268	6.4e-08	9.13e-07	7.72769
ENSG00000133466	C1QTNF6	1.36475	6.49e-08	9.26e-07	7.71297
ENSG00000155158	TTC39B	1.30946	6.5e-08	9.26e-07	7.7122
ENSG00000211455	STK38L	1.31945	6.51e-08	9.27e-07	7.71088
ENSG00000137040	RANBP6	1.25913	6.56e-08	9.33e-07	7.7036
ENSG00000050748	MAPK9	1.22642	6.56e-08	9.33e-07	7.70372
ENSG00000180316	PNPLA1	1.103	6.56e-08	9.33e-07	7.70282
ENSG00000179168	GGN	1.17754	6.58e-08	9.35e-07	7.70022
ENSG00000211456	SACM1L	1.20529	6.61e-08	9.37e-07	7.69683
ENSG00000257103	LSM14A	1.18542	6.66e-08	9.44e-07	7.68871
ENSG00000170011	MYRIP	1.55153	6.68e-08	9.45e-07	7.68587
ENSG00000076356	PLXNA2	1.47973	6.68e-08	9.45e-07	7.68549
ENSG00000144535	DIS3L2	1.18392	6.68e-08	9.45e-07	7.68668
ENSG00000136819	C9orf78	1.16184	6.74e-08	9.52e-07	7.67722
ENSG00000130749	ZC3H4	1.2208	6.77e-08	9.56e-07	7.67258
ENSG00000253352	TUG1	1.26939	6.79e-08	9.56e-07	7.67033
ENSG00000188386	PPP3R2	1.01463	6.79e-08	9.56e-07	7.6704
ENSG00000078795	PKD2L2	1.16126	6.81e-08	9.58e-07	7.66748
ENSG00000169902	TPST1	1.52804	6.84e-08	9.61e-07	7.66362
ENSG00000121297	TSHZ3	1.11059	6.86e-08	9.64e-07	7.66003
ENSG00000183690	EFHC2	1.12554	6.89e-08	9.67e-07	7.65645
ENSG00000221944	TIGD1	1.21485	6.9e-08	9.67e-07	7.6554
ENSG00000185274	GALNT17	1.32252	6.94e-08	9.73e-07	7.64913
ENSG00000167653	PSCA	1.16668	6.97e-08	9.76e-07	7.64565
ENSG00000117090	SLAMF1	2.23508	6.98e-08	9.76e-07	7.64456
ENSG00000048991	R3HDM1	1.27278	7.04e-08	9.85e-07	7.63518
ENSG00000115263	GCG	1.0594	7.16e-08	1e-06	7.61981
ENSG00000242852	ZNF709	1.24043	7.18e-08	1e-06	7.61711
ENSG00000163872	YEATS2	1.22839	7.27e-08	1.01e-06	7.60489
ENSG00000061273	HDAC7	1.2726	7.35e-08	1.02e-06	7.59394
ENSG00000115112	TFCP2L1	1.05552	7.39e-08	1.03e-06	7.58884
ENSG00000008277	ADAM22	1.43399	7.44e-08	1.03e-06	7.58318
ENSG00000105755	ETHE1	1.21953	7.49e-08	1.04e-06	7.57582
ENSG00000196083	IL1RAP	1.27905	7.51e-08	1.04e-06	7.57374
ENSG00000196781	TLE1	2.03731	7.53e-08	1.05e-06	7.57084
ENSG00000258947	TUBB3	1.36702	7.55e-08	1.05e-06	7.56868
ENSG00000160181	TFF2	1.31053	7.63e-08	1.06e-06	7.55825
ENSG00000232629	HLA-DQB2	1.28277	7.63e-08	1.06e-06	7.55885
ENSG00000182489	XKRX	1.50715	7.68e-08	1.06e-06	7.55231
ENSG00000231925	TAPBP	1.22833	7.69e-08	1.06e-06	7.55076
ENSG00000158428	CATIP	1.11782	7.9e-08	1.09e-06	7.52524
ENSG00000109062	SLC9A3R1	1.3268	7.95e-08	1.1e-06	7.51932
ENSG00000105677	TMEM147	1.26828	7.98e-08	1.1e-06	7.51517
ENSG00000140575	IQGAP1	1.24221	8.06e-08	1.11e-06	7.50609
ENSG00000181036	FCRL6	1.18274	8.09e-08	1.11e-06	7.50289
ENSG00000105388	CEACAM5	1.06138	8.1e-08	1.11e-06	7.50196
ENSG00000143257	NR1I3	1.15165	8.1e-08	1.12e-06	7.5008
ENSG00000178295	2001-01-01	1.3715	8.11e-08	1.12e-06	7.50017
ENSG00000011485	PPP5C	1.29484	8.13e-08	1.12e-06	7.49792
ENSG00000005206	SPPL2B	1.26231	8.13e-08	1.12e-06	7.4978
ENSG00000138162	TACC2	1.15717	8.17e-08	1.12e-06	7.49353
ENSG00000022556	NLRP2	1.4438	8.19e-08	1.12e-06	7.49057
ENSG00000165807	PPP1R36	1.19333	8.21e-08	1.12e-06	7.48865
ENSG00000213471	TTLL13P	1.08238	8.3e-08	1.14e-06	7.47745
ENSG00000137267	TUBB2A	1.65589	8.35e-08	1.14e-06	7.47185
ENSG00000181458	TMEM45A	1.4013	8.35e-08	1.14e-06	7.47215
ENSG00000177807	KCNJ10	1.19365	8.36e-08	1.14e-06	7.47116
ENSG00000260027	HOXB7	1.50389	8.38e-08	1.14e-06	7.4691
ENSG00000128923	MINDY2	1.32421	8.38e-08	1.14e-06	7.46888
ENSG00000161847	RAVER1	1.2487	8.58e-08	1.17e-06	7.44679
ENSG00000105135	ILVBL	1.18749	8.59e-08	1.17e-06	7.44502
ENSG00000181652	ATG9B	1.25328	8.6e-08	1.17e-06	7.44415
ENSG00000078098	FAP	1.24721	8.63e-08	1.17e-06	7.44029
ENSG00000171291	ZNF439	1.32704	8.68e-08	1.18e-06	7.43535
ENSG00000105722	ERF	1.34869	8.71e-08	1.18e-06	7.4322
ENSG00000183475	ASB7	1.23881	8.74e-08	1.19e-06	7.42905
ENSG00000164209	SLC25A46	1.18796	8.76e-08	1.19e-06	7.42601
ENSG00000108813	DLX4	1.45586	8.77e-08	1.19e-06	7.42532
ENSG00000163481	RNF25	1.20285	8.78e-08	1.19e-06	7.42424
ENSG00000115239	ASB3	1.2232	8.83e-08	1.19e-06	7.4187
ENSG00000125755	SYMPK	1.23506	8.9e-08	1.2e-06	7.41076
ENSG00000198648	STK39	1.52683	8.97e-08	1.21e-06	7.40336
ENSG00000099331	MYO9B	1.26071	9e-08	1.22e-06	7.39996
ENSG00000160469	BRSK1	1.69406	9.06e-08	1.22e-06	7.39385
ENSG00000143862	ARL8A	1.33226	9.1e-08	1.23e-06	7.39029
ENSG00000160058	BSDC1	1.20538	9.17e-08	1.23e-06	7.38234
ENSG00000078124	ACER3	1.27952	9.26e-08	1.25e-06	7.37362
ENSG00000183682	BMP8A	1.45655	9.28e-08	1.25e-06	7.37165
ENSG00000087088	BAX	1.22219	9.3e-08	1.25e-06	7.36895
ENSG00000012660	ELOVL5	1.35275	9.33e-08	1.25e-06	7.36642
ENSG00000164542	KIAA0895	1.36854	9.34e-08	1.25e-06	7.36472
ENSG00000154134	ROBO3	1.93094	9.38e-08	1.26e-06	7.36118
ENSG00000204116	CHIC1	1.24921	9.47e-08	1.27e-06	7.35156
ENSG00000178904	DPY19L3	1.2485	9.58e-08	1.28e-06	7.3405
ENSG00000132549	VPS13B	1.22094	9.63e-08	1.29e-06	7.33596
ENSG00000123933	MXD4	1.23513	9.71e-08	1.3e-06	7.32742
ENSG00000122224	LY9	1.53038	9.77e-08	1.3e-06	7.32213
ENSG00000104960	PTOV1	1.20862	9.78e-08	1.31e-06	7.32055
ENSG00000172345	STARD5	1.41703	9.81e-08	1.31e-06	7.31793
ENSG00000173626	TRAPPC3L	1.17468	9.83e-08	1.31e-06	7.31563
ENSG00000109390	NDUFC1	1.20514	9.9e-08	1.32e-06	7.30956
ENSG00000128463	EMC4	1.15677	9.92e-08	1.32e-06	7.30698
ENSG00000084734	GCKR	1.09665	9.94e-08	1.32e-06	7.30493
ENSG00000177575	CD163	1.57248	9.96e-08	1.32e-06	7.3031
ENSG00000090054	SPTLC1	1.16377	9.98e-08	1.33e-06	7.3011
ENSG00000002933	TMEM176A	1.64891	1.01e-07	1.34e-06	7.28968
ENSG00000198792	TMEM184B	1.46115	1.01e-07	1.34e-06	7.28939
ENSG00000134339	SAA2	1.16135	1.01e-07	1.34e-06	7.28684
ENSG00000161204	ABCF3	1.24774	1.02e-07	1.35e-06	7.27906
ENSG00000114270	COL7A1	1.39063	1.03e-07	1.35e-06	7.27575
ENSG00000129933	MAU2	1.22852	1.03e-07	1.35e-06	7.27595
ENSG00000166887	VPS39	1.23716	1.03e-07	1.36e-06	7.2693
ENSG00000241399	CD302	1.38946	1.04e-07	1.37e-06	7.26408
ENSG00000100439	ABHD4	1.38732	1.04e-07	1.37e-06	7.26286
ENSG00000148384	INPP5E	1.24727	1.04e-07	1.37e-06	7.26003
ENSG00000107295	SH3GL2	1.05554	1.04e-07	1.37e-06	7.26616
ENSG00000156103	MMP16	1.43508	1.07e-07	1.4e-06	7.23648
ENSG00000170871	KIAA0232	1.22596	1.07e-07	1.4e-06	7.23853
ENSG00000162302	RPS6KA4	1.22205	1.07e-07	1.4e-06	7.23832
ENSG00000183741	CBX6	1.42506	1.08e-07	1.41e-06	7.22939
ENSG00000182149	IST1	1.32612	1.08e-07	1.42e-06	7.22187
ENSG00000196407	THEM5	1.59462	1.1e-07	1.44e-06	7.20562
ENSG00000197226	TBC1D9B	1.24412	1.1e-07	1.44e-06	7.21252
ENSG00000102174	PHEX	1.0903	1.1e-07	1.44e-06	7.20821
ENSG00000165434	PGM2L1	1.22521	1.12e-07	1.46e-06	7.19421
ENSG00000044459	CNTLN	1.27925	1.12e-07	1.47e-06	7.18984
ENSG00000041988	THAP3	1.25457	1.13e-07	1.47e-06	7.18407
ENSG00000197375	SLC22A5	1.20421	1.13e-07	1.47e-06	7.18503
ENSG00000072952	IRAG1	1.15999	1.13e-07	1.48e-06	7.17885
ENSG00000128274	A4GALT	1.36548	1.14e-07	1.48e-06	7.17408
ENSG00000131899	LLGL1	1.21507	1.14e-07	1.48e-06	7.17386
ENSG00000187980	PLA2G2C	1.04073	1.14e-07	1.48e-06	7.17433
ENSG00000184828	ZBTB7C	1.23078	1.15e-07	1.5e-06	7.16301
ENSG00000116514	RNF19B	1.311	1.16e-07	1.51e-06	7.15627
ENSG00000249115	HAUS5	1.22937	1.16e-07	1.51e-06	7.1536
ENSG00000163686	ABHD6	1.24036	1.17e-07	1.52e-06	7.14608
ENSG00000136381	IREB2	1.2341	1.18e-07	1.54e-06	7.1388
ENSG00000100099	HPS4	1.25788	1.19e-07	1.55e-06	7.12984
ENSG00000238243	OR2W3	1.14305	1.2e-07	1.56e-06	7.12142
ENSG00000224470	ATXN1L	1.31322	1.21e-07	1.56e-06	7.12088
ENSG00000101236	RNF24	1.2273	1.23e-07	1.59e-06	7.10417
ENSG00000255508	AP002990.1	1.18565	1.23e-07	1.59e-06	7.10101
ENSG00000168703	WFDC12	1.09732	1.25e-07	1.61e-06	7.0894
ENSG00000186204	CYP4F12	1.26561	1.26e-07	1.63e-06	7.07669
ENSG00000187446	CHP1	1.21451	1.26e-07	1.63e-06	7.07885
ENSG00000155099	PIP4P2	1.27173	1.28e-07	1.65e-06	7.06021
ENSG00000158796	DEDD	1.24694	1.28e-07	1.65e-06	7.06593
ENSG00000161381	PLXDC1	1.25904	1.29e-07	1.66e-06	7.05398
ENSG00000142409	ZNF787	1.16072	1.29e-07	1.67e-06	7.05222
ENSG00000171643	S100Z	1.78704	1.3e-07	1.67e-06	7.04676
ENSG00000165338	HECTD2	1.36414	1.31e-07	1.68e-06	7.04104
ENSG00000139624	CERS5	1.18711	1.32e-07	1.69e-06	7.03409
ENSG00000244020	MT1HL1	1.13456	1.32e-07	1.69e-06	7.03303
ENSG00000118985	ELL2	1.3563	1.34e-07	1.72e-06	7.01824
ENSG00000068615	REEP1	1.18566	1.34e-07	1.72e-06	7.01864
ENSG00000181215	C4orf50	1.24776	1.35e-07	1.72e-06	7.01468
ENSG00000059122	FLYWCH1	1.28711	1.35e-07	1.73e-06	7.01002
ENSG00000186951	PPARA	1.23165	1.35e-07	1.73e-06	7.00923
ENSG00000168090	COPS6	1.16723	1.35e-07	1.73e-06	7.01248
ENSG00000186265	BTLA	1.94418	1.37e-07	1.75e-06	6.99577
ENSG00000128610	FEZF1	1.28596	1.38e-07	1.76e-06	6.99009
ENSG00000140262	TCF12	1.22014	1.4e-07	1.78e-06	6.97989
ENSG00000100084	HIRA	1.18999	1.4e-07	1.78e-06	6.9776
ENSG00000144648	ACKR2	1.12965	1.4e-07	1.78e-06	6.97814
ENSG00000057294	PKP2	1.99551	1.42e-07	1.8e-06	6.96587
ENSG00000261147	AC091167.2	1.08738	1.42e-07	1.81e-06	6.96285
ENSG00000147082	CCNB3	1.1438	1.43e-07	1.82e-06	6.95424
ENSG00000177311	ZBTB38	1.41727	1.44e-07	1.82e-06	6.95222
ENSG00000236287	ZBED5	1.25407	1.44e-07	1.83e-06	6.94829
ENSG00000166411	IDH3A	1.28166	1.45e-07	1.84e-06	6.94535
ENSG00000103042	SLC38A7	1.24846	1.45e-07	1.84e-06	6.94381
ENSG00000058673	ZC3H11A	1.21881	1.45e-07	1.84e-06	6.94479
ENSG00000011243	AKAP8L	1.1981	1.45e-07	1.84e-06	6.94366
ENSG00000104881	PPP1R13L	1.38857	1.48e-07	1.87e-06	6.92413
ENSG00000176248	ANAPC2	1.20697	1.48e-07	1.87e-06	6.92405
ENSG00000135631	RAB11FIP5	1.52702	1.49e-07	1.88e-06	6.91925
ENSG00000156860	FBRS	1.28887	1.49e-07	1.88e-06	6.92004
ENSG00000197748	CFAP43	1.15392	1.49e-07	1.88e-06	6.91723
ENSG00000102096	PIM2	1.42614	1.5e-07	1.88e-06	6.91428
ENSG00000165219	GAPVD1	1.23084	1.5e-07	1.89e-06	6.90985
ENSG00000143442	POGZ	1.2724	1.51e-07	1.9e-06	6.90299
ENSG00000104369	JPH1	1.10692	1.52e-07	1.91e-06	6.90079
ENSG00000105127	AKAP8	1.18652	1.52e-07	1.92e-06	6.89614
ENSG00000188282	RUFY4	1.62201	1.53e-07	1.92e-06	6.89313
ENSG00000188994	ZNF292	1.2431	1.53e-07	1.92e-06	6.89114
ENSG00000250510	GPR162	1.54986	1.55e-07	1.94e-06	6.8803
ENSG00000167378	IRGQ	1.26666	1.55e-07	1.94e-06	6.88193
ENSG00000099282	TSPAN15	1.18019	1.56e-07	1.95e-06	6.87655
ENSG00000122862	SRGN	1.38136	1.57e-07	1.97e-06	6.86506
ENSG00000150477	KIAA1328	1.31048	1.58e-07	1.97e-06	6.86463
ENSG00000048140	TSPAN17	1.1823	1.58e-07	1.97e-06	6.86429
ENSG00000137872	SEMA6D	1.36547	1.59e-07	1.98e-06	6.85811
ENSG00000162512	SDC3	1.64228	1.59e-07	1.99e-06	6.8539
ENSG00000101856	PGRMC1	1.27254	1.6e-07	2e-06	6.84726
ENSG00000100276	RASL10A	1.17182	1.6e-07	2e-06	6.8501
ENSG00000135596	MICAL1	1.37901	1.62e-07	2.01e-06	6.8401
ENSG00000109321	AREG	2.10001	1.64e-07	2.04e-06	6.82581
ENSG00000131477	RAMP2	1.66055	1.64e-07	2.04e-06	6.82562
ENSG00000027644	INSRR	1.05778	1.65e-07	2.05e-06	6.81935
ENSG00000033170	FUT8	1.62067	1.65e-07	2.06e-06	6.81754
ENSG00000166681	BEX3	1.8743	1.66e-07	2.06e-06	6.81483
ENSG00000250151	ARPC4-TTLL3	1.33602	1.66e-07	2.06e-06	6.81558
ENSG00000133138	TBC1D8B	1.29701	1.68e-07	2.08e-06	6.80582
ENSG00000021488	SLC7A9	1.10242	1.68e-07	2.08e-06	6.80312
ENSG00000084636	COL16A1	1.25877	1.69e-07	2.09e-06	6.79958
ENSG00000049540	ELN	1.17858	1.69e-07	2.09e-06	6.79951
ENSG00000135925	WNT10A	1.78569	1.7e-07	2.1e-06	6.79263
ENSG00000128000	ZNF780B	1.24205	1.7e-07	2.1e-06	6.79089
ENSG00000157657	ZNF618	1.24956	1.72e-07	2.12e-06	6.7816
ENSG00000112893	MAN2A1	1.28467	1.75e-07	2.16e-06	6.76279
ENSG00000151092	NGLY1	1.20082	1.75e-07	2.16e-06	6.76448
ENSG00000069764	PLA2G10	1.17746	1.75e-07	2.16e-06	6.76316
ENSG00000187944	C2orf66	1.07977	1.76e-07	2.17e-06	6.75603
ENSG00000125166	GOT2	1.24533	1.77e-07	2.17e-06	6.75557
ENSG00000120093	HOXB3	1.48487	1.78e-07	2.18e-06	6.75022
ENSG00000263874	LINC00672	1.21464	1.79e-07	2.19e-06	6.74467
ENSG00000070159	PTPN3	1.21027	1.79e-07	2.19e-06	6.74484
ENSG00000212747	RTL8B	1.37474	1.79e-07	2.2e-06	6.73998
ENSG00000138443	ABI2	1.27653	1.79e-07	2.2e-06	6.74325
ENSG00000181690	PLAG1	1.60617	1.8e-07	2.2e-06	6.73889
ENSG00000255221	CARD17	1.33112	1.81e-07	2.22e-06	6.73159
ENSG00000131831	RAI2	1.24313	1.82e-07	2.22e-06	6.72856
ENSG00000151812	SLC35F4	1.18012	1.82e-07	2.22e-06	6.72807
ENSG00000129250	KIF1C	1.32371	1.82e-07	2.23e-06	6.72616
ENSG00000163900	TMEM41A	1.21151	1.83e-07	2.23e-06	6.72342
ENSG00000196420	S100A5	1.14065	1.83e-07	2.24e-06	6.72149
ENSG00000100341	PNPLA5	1.05695	1.83e-07	2.24e-06	6.71931
ENSG00000152443	ZNF776	1.27096	1.85e-07	2.26e-06	6.71164
ENSG00000076321	KLHL20	1.21543	1.85e-07	2.26e-06	6.70994
ENSG00000145868	FBXO38	1.21374	1.85e-07	2.26e-06	6.71053
ENSG00000115170	ACVR1	1.26752	1.88e-07	2.28e-06	6.69778
ENSG00000113719	ERGIC1	1.23645	1.88e-07	2.28e-06	6.69743
ENSG00000166847	DCTN5	1.18418	1.9e-07	2.3e-06	6.68792
ENSG00000106686	SPATA6L	1.19431	1.9e-07	2.31e-06	6.68683
ENSG00000128791	TWSG1	1.32306	1.91e-07	2.31e-06	6.68268
ENSG00000101638	ST8SIA5	1.20049	1.91e-07	2.32e-06	6.67867
ENSG00000086102	NFX1	1.20959	1.92e-07	2.33e-06	6.67484
ENSG00000170445	HARS1	1.15161	1.92e-07	2.33e-06	6.67479
ENSG00000135837	CEP350	1.25864	1.93e-07	2.34e-06	6.67139
ENSG00000179921	GPBAR1	1.18581	1.93e-07	2.34e-06	6.6711
ENSG00000122203	KIAA1191	1.18082	1.95e-07	2.36e-06	6.66212
ENSG00000204516	MICB	1.22868	1.96e-07	2.37e-06	6.65446
ENSG00000105357	MYH14	1.14938	1.96e-07	2.37e-06	6.65716
ENSG00000115840	SLC25A12	1.21588	1.97e-07	2.38e-06	6.65038
ENSG00000137962	ARHGAP29	1.20679	1.98e-07	2.39e-06	6.64406
ENSG00000090097	PCBP4	1.31156	1.99e-07	2.41e-06	6.63893
ENSG00000065615	CYB5R4	1.26171	2.01e-07	2.42e-06	6.63286
ENSG00000077713	SLC25A43	1.3927	2.03e-07	2.44e-06	6.6226
ENSG00000111110	PPM1H	1.32679	2.04e-07	2.45e-06	6.61904
ENSG00000103121	CMC2	1.21502	2.06e-07	2.48e-06	6.60637
ENSG00000153498	SPACA7	1.12824	2.06e-07	2.48e-06	6.60597
ENSG00000065371	ROPN1	1.04212	2.06e-07	2.48e-06	6.60786
ENSG00000160746	ANO10	1.25785	2.07e-07	2.49e-06	6.60231
ENSG00000196090	PTPRT	1.12003	2.09e-07	2.5e-06	6.59562
ENSG00000110925	CSRNP2	1.23295	2.1e-07	2.52e-06	6.58777
ENSG00000171476	HOPX	1.63172	2.12e-07	2.54e-06	6.57902
ENSG00000135919	SERPINE2	2.06904	2.13e-07	2.54e-06	6.57853
ENSG00000142920	AZIN2	1.2152	2.14e-07	2.57e-06	6.56962
ENSG00000065154	OAT	1.29766	2.15e-07	2.57e-06	6.56924
ENSG00000135426	TESPA1	1.26712	2.18e-07	2.6e-06	6.55591
ENSG00000165197	VEGFD	1.10497	2.18e-07	2.6e-06	6.55586
ENSG00000023330	ALAS1	1.22191	2.18e-07	2.61e-06	6.55279
ENSG00000177034	MTX3	1.3762	2.22e-07	2.65e-06	6.5361
ENSG00000152128	TMEM163	1.36975	2.22e-07	2.65e-06	6.53488
ENSG00000099797	TECR	1.23924	2.23e-07	2.66e-06	6.53265
ENSG00000070371	CLTCL1	1.18458	2.24e-07	2.67e-06	6.52822
ENSG00000160712	IL6R	1.742	2.25e-07	2.67e-06	6.52546
ENSG00000134046	MBD2	1.30695	2.25e-07	2.67e-06	6.52502
ENSG00000225556	C2CD4D	1.37029	2.25e-07	2.68e-06	6.5225
ENSG00000153902	LGI4	1.52617	2.26e-07	2.68e-06	6.51975
ENSG00000188766	SPRED3	1.21158	2.26e-07	2.69e-06	6.5179
ENSG00000076043	REXO2	1.3054	2.28e-07	2.7e-06	6.51326
ENSG00000169905	TOR1AIP2	1.28421	2.31e-07	2.74e-06	6.49948
ENSG00000158079	PTPDC1	1.3665	2.33e-07	2.76e-06	6.4914
ENSG00000156140	ADAMTS3	1.12975	2.33e-07	2.76e-06	6.49071
ENSG00000071073	MGAT4A	1.4845	2.34e-07	2.77e-06	6.48455
ENSG00000130985	UBA1	1.20101	2.36e-07	2.79e-06	6.47939
ENSG00000076650	GPATCH1	1.20079	2.36e-07	2.79e-06	6.47798
ENSG00000197121	PGAP1	1.25019	2.4e-07	2.83e-06	6.46191
ENSG00000132155	RAF1	1.22968	2.41e-07	2.85e-06	6.45748
ENSG00000082269	FAM135A	1.28433	2.45e-07	2.89e-06	6.44078
ENSG00000163638	ADAMTS9	1.177	2.45e-07	2.89e-06	6.44169
ENSG00000127914	AKAP9	1.2615	2.46e-07	2.89e-06	6.43965
ENSG00000112981	NME5	1.23992	2.46e-07	2.89e-06	6.43841
ENSG00000172197	MBOAT1	1.50896	2.47e-07	2.9e-06	6.43588
ENSG00000156642	NPTN	1.2411	2.47e-07	2.9e-06	6.43465
ENSG00000167614	TTYH1	1.21784	2.48e-07	2.91e-06	6.43124
ENSG00000158850	B4GALT3	1.27419	2.49e-07	2.93e-06	6.42586
ENSG00000103035	PSMD7	1.24683	2.52e-07	2.96e-06	6.41451
ENSG00000161010	MRNIP	1.2512	2.53e-07	2.97e-06	6.41192
ENSG00000241973	PI4KA	1.23939	2.56e-07	3e-06	6.40104
ENSG00000138801	PAPSS1	1.27301	2.58e-07	3.01e-06	6.39489
ENSG00000142675	CNKSR1	1.7577	2.58e-07	3.02e-06	6.39232
ENSG00000198055	GRK6	1.3051	2.58e-07	3.02e-06	6.39205
ENSG00000145861	C1QTNF2	1.03573	2.59e-07	3.02e-06	6.39051
ENSG00000166313	APBB1	1.47354	2.61e-07	3.05e-06	6.3826
ENSG00000132359	RAP1GAP2	1.66644	2.63e-07	3.07e-06	6.37389
ENSG00000167208	SNX20	1.31268	2.63e-07	3.07e-06	6.3755
ENSG00000132297	HHLA1	1.2165	2.64e-07	3.07e-06	6.37232
ENSG00000072062	PRKACA	1.24265	2.65e-07	3.09e-06	6.36684
ENSG00000174038	C9orf131	1.24236	2.65e-07	3.09e-06	6.36721
ENSG00000087495	PHACTR3	1.80314	2.66e-07	3.09e-06	6.36549
ENSG00000125726	CD70	1.50231	2.66e-07	3.09e-06	6.36347
ENSG00000142669	SH3BGRL3	1.2413	2.67e-07	3.1e-06	6.36208
ENSG00000177694	NAALADL2	1.36234	2.69e-07	3.12e-06	6.35329
ENSG00000179361	ARID3B	1.33714	2.69e-07	3.12e-06	6.35432
ENSG00000100321	SYNGR1	2.0576	2.71e-07	3.14e-06	6.34442
ENSG00000137434	C6orf52	1.30235	2.71e-07	3.14e-06	6.34522
ENSG00000170748	RBMXL2	1.15165	2.71e-07	3.14e-06	6.34609
ENSG00000212657	KRTAP16-1	1.08727	2.73e-07	3.16e-06	6.33903
ENSG00000011590	ZBTB32	1.41942	2.81e-07	3.24e-06	6.31186
ENSG00000100226	GTPBP1	1.30088	2.81e-07	3.25e-06	6.31039
ENSG00000111863	ADTRP	2.15475	2.82e-07	3.25e-06	6.30809
ENSG00000079277	MKNK1	1.20747	2.82e-07	3.25e-06	6.30856
ENSG00000173020	GRK2	1.24196	2.84e-07	3.27e-06	6.30198
ENSG00000139438	FAM222A	1.23583	2.84e-07	3.27e-06	6.30279
ENSG00000172943	PHF8	1.20854	2.84e-07	3.27e-06	6.30143
ENSG00000164329	TENT2	1.17682	2.86e-07	3.29e-06	6.29524
ENSG00000106266	SNX8	1.26984	2.89e-07	3.32e-06	6.28615
ENSG00000168394	TAP1	1.34294	2.9e-07	3.33e-06	6.28148
ENSG00000103184	SEC14L5	1.03549	2.92e-07	3.35e-06	6.27337
ENSG00000125834	STK35	1.19124	2.94e-07	3.36e-06	6.2693
ENSG00000173597	SULT1B1	1.18419	2.96e-07	3.39e-06	6.26112
ENSG00000105048	TNNT1	1.2224	2.97e-07	3.4e-06	6.25869
ENSG00000069345	DNAJA2	1.19366	2.98e-07	3.4e-06	6.25666
ENSG00000132518	GUCY2D	1.37888	3e-07	3.43e-06	6.24761
ENSG00000140307	GTF2A2	1.19108	3.01e-07	3.44e-06	6.24558
ENSG00000078053	AMPH	1.18121	3.02e-07	3.44e-06	6.24387
ENSG00000186952	TMEM232	1.26529	3.03e-07	3.46e-06	6.23978
ENSG00000100280	AP1B1	1.23167	3.09e-07	3.52e-06	6.2221
ENSG00000135447	PPP1R1A	1.13175	3.09e-07	3.52e-06	6.2203
ENSG00000155966	AFF2	1.75977	3.13e-07	3.56e-06	6.20866
ENSG00000144118	RALB	1.25403	3.17e-07	3.61e-06	6.19578
ENSG00000172803	SNX32	1.2506	3.17e-07	3.61e-06	6.19547
ENSG00000128989	ARPP19	1.26537	3.19e-07	3.62e-06	6.19041
ENSG00000172534	HCFC1	1.21693	3.2e-07	3.63e-06	6.18888
ENSG00000166073	GPR176	1.67055	3.21e-07	3.64e-06	6.18325
ENSG00000175221	MED16	1.22248	3.21e-07	3.64e-06	6.18422
ENSG00000128881	TTBK2	1.21347	3.21e-07	3.64e-06	6.18582
ENSG00000125970	RALY	1.29596	3.22e-07	3.65e-06	6.18095
ENSG00000113504	SLC12A7	1.3824	3.23e-07	3.65e-06	6.17908
ENSG00000196588	MRTFA	1.30179	3.23e-07	3.65e-06	6.17786
ENSG00000100412	ACO2	1.22083	3.23e-07	3.65e-06	6.17783
ENSG00000100036	SLC35E4	1.17643	3.23e-07	3.65e-06	6.17809
ENSG00000183621	ZNF438	1.1923	3.24e-07	3.65e-06	6.17668
ENSG00000115526	CHST10	1.39586	3.26e-07	3.68e-06	6.16999
ENSG00000116698	SMG7	1.23722	3.33e-07	3.76e-06	6.14819
ENSG00000104213	PDGFRL	1.25014	3.34e-07	3.76e-06	6.14736
ENSG00000128602	SMO	1.07137	3.34e-07	3.76e-06	6.1459
ENSG00000140400	MAN2C1	1.26791	3.35e-07	3.76e-06	6.14435
ENSG00000196666	FAM180B	1.07648	3.35e-07	3.76e-06	6.14483
ENSG00000106144	CASP2	1.21447	3.36e-07	3.77e-06	6.14199
ENSG00000130254	SAFB2	1.20767	3.37e-07	3.79e-06	6.13731
ENSG00000203795	FAM24A	1.02304	3.38e-07	3.79e-06	6.13621
ENSG00000132259	CNGA4	1.14179	3.38e-07	3.8e-06	6.1339
ENSG00000103222	ABCC1	1.27621	3.39e-07	3.8e-06	6.13155
ENSG00000169032	MAP2K1	1.22048	3.41e-07	3.81e-06	6.12804
ENSG00000092445	TYRO3	1.19845	3.41e-07	3.81e-06	6.12779
ENSG00000197361	FBXL22	1.145	3.45e-07	3.87e-06	6.11439
ENSG00000188859	FAM78B	1.33124	3.48e-07	3.89e-06	6.10839
ENSG00000135678	CPM	1.25553	3.48e-07	3.89e-06	6.1085
ENSG00000160323	ADAMTS13	1.30095	3.49e-07	3.9e-06	6.10529
ENSG00000219073	CELA3B	1.1994	3.5e-07	3.91e-06	6.10175
ENSG00000128524	ATP6V1F	1.17638	3.55e-07	3.96e-06	6.0881
ENSG00000077782	FGFR1	1.31219	3.56e-07	3.97e-06	6.08584
ENSG00000108370	RGS9	1.14234	3.59e-07	4e-06	6.07768
ENSG00000183876	ARSI	1.08247	3.61e-07	4.02e-06	6.07163
ENSG00000155545	MIER3	1.25872	3.64e-07	4.06e-06	6.06331
ENSG00000074181	NOTCH3	1.16583	3.67e-07	4.08e-06	6.05701
ENSG00000117523	PRRC2C	1.26349	3.71e-07	4.12e-06	6.04697
ENSG00000172123	SLFN12	1.31601	3.74e-07	4.15e-06	6.03921
ENSG00000163888	CAMK2N2	1.33848	3.75e-07	4.16e-06	6.0359
ENSG00000169857	AVEN	1.24073	3.75e-07	4.16e-06	6.03635
ENSG00000142233	NTN5	1.19995	3.78e-07	4.19e-06	6.02842
ENSG00000125850	OVOL2	1.18661	3.79e-07	4.2e-06	6.02538
ENSG00000090013	BLVRB	1.38419	3.81e-07	4.22e-06	6.02048
ENSG00000142530	FAM71E1	1.17905	3.81e-07	4.22e-06	6.02182
ENSG00000138613	APH1B	1.38816	3.85e-07	4.26e-06	6.01143
ENSG00000203730	TEDDM1	1.03981	3.85e-07	4.26e-06	6.01092
ENSG00000162728	KCNJ9	1.03705	3.9e-07	4.31e-06	5.99903
ENSG00000154262	ABCA6	1.31073	3.95e-07	4.35e-06	5.98644
ENSG00000138614	INTS14	1.15764	3.95e-07	4.35e-06	5.98751
ENSG00000173705	SUSD5	1.06482	3.97e-07	4.38e-06	5.98089
ENSG00000196684	HSH2D	1.4232	3.99e-07	4.39e-06	5.97666
ENSG00000185133	INPP5J	1.35465	3.99e-07	4.39e-06	5.97674
ENSG00000203697	CAPN8	1.31287	4.07e-07	4.48e-06	5.95705
ENSG00000157823	AP3S2	1.28269	4.08e-07	4.49e-06	5.95536
ENSG00000116017	ARID3A	1.28096	4.09e-07	4.5e-06	5.95278
ENSG00000168434	COG7	1.22618	4.1e-07	4.51e-06	5.94966
ENSG00000158769	F11R	1.32688	4.12e-07	4.52e-06	5.94675
ENSG00000088726	TMEM40	1.13442	4.12e-07	4.52e-06	5.94632
ENSG00000174738	NR1D2	1.28402	4.14e-07	4.54e-06	5.94152
ENSG00000147394	ZNF185	1.50185	4.15e-07	4.54e-06	5.9399
ENSG00000182218	HHIPL1	1.06553	4.16e-07	4.55e-06	5.93736
ENSG00000175606	TMEM70	1.21176	4.22e-07	4.62e-06	5.92269
ENSG00000143549	TPM3	1.27512	4.28e-07	4.68e-06	5.90919
ENSG00000158545	ZC3H18	1.21577	4.28e-07	4.68e-06	5.9097
ENSG00000086717	PPEF1	1.12789	4.28e-07	4.68e-06	5.91023
ENSG00000105700	KXD1	1.14282	4.29e-07	4.69e-06	5.9066
ENSG00000179938	GOLGA8J	1.13337	4.37e-07	4.77e-06	5.89032
ENSG00000164303	ENPP6	1.27111	4.39e-07	4.78e-06	5.88566
ENSG00000204025	TRPC5OS	1.09552	4.39e-07	4.78e-06	5.88613
ENSG00000177614	PGBD5	1.21761	4.43e-07	4.82e-06	5.87754
ENSG00000132842	AP3B1	1.17699	4.47e-07	4.87e-06	5.86741
ENSG00000123143	PKN1	1.1571	4.48e-07	4.88e-06	5.86596
ENSG00000178171	AMER3	1.0267	4.49e-07	4.88e-06	5.86395
ENSG00000164080	RAD54L2	1.23285	4.51e-07	4.9e-06	5.85957
ENSG00000054965	FAM168A	1.21682	4.51e-07	4.9e-06	5.85999
ENSG00000109103	UNC119	1.25584	4.55e-07	4.94e-06	5.85182
ENSG00000185008	ROBO2	1.31031	4.56e-07	4.95e-06	5.84879
ENSG00000140463	BBS4	1.22522	4.56e-07	4.95e-06	5.84844
ENSG00000170775	GPR37	1.36031	4.57e-07	4.96e-06	5.84669
ENSG00000066032	CTNNA2	1.72274	4.59e-07	4.97e-06	5.84216
ENSG00000187837	H1-2	1.62109	4.59e-07	4.97e-06	5.84323
ENSG00000079435	LIPE	1.24138	4.59e-07	4.97e-06	5.84372
ENSG00000183735	TBK1	1.17798	4.6e-07	4.97e-06	5.84093
ENSG00000138829	FBN2	1.18019	4.66e-07	5.04e-06	5.82847
ENSG00000213390	ARHGAP19	1.20758	4.69e-07	5.07e-06	5.82171
ENSG00000180353	HCLS1	1.19914	4.69e-07	5.07e-06	5.82233
ENSG00000118260	CREB1	1.21692	4.72e-07	5.09e-06	5.81648
ENSG00000172782	FADS6	1.13924	4.72e-07	5.09e-06	5.81734
ENSG00000155846	PPARGC1B	1.29226	4.75e-07	5.12e-06	5.80954
ENSG00000166289	PLEKHF1	1.52001	4.77e-07	5.14e-06	5.80674
ENSG00000011304	PTBP1	1.14788	4.79e-07	5.16e-06	5.80162
ENSG00000088682	COQ9	1.30657	4.82e-07	5.19e-06	5.79554
ENSG00000077616	NAALAD2	1.24582	4.82e-07	5.19e-06	5.7957
ENSG00000140406	TLNRD1	1.26681	4.87e-07	5.23e-06	5.78676
ENSG00000165458	INPPL1	1.2386	4.87e-07	5.23e-06	5.78728
ENSG00000198785	GRIN3A	1.05879	4.87e-07	5.23e-06	5.78641
ENSG00000172037	LAMB2	1.5291	4.88e-07	5.23e-06	5.7853
ENSG00000181827	RFX7	1.27607	4.88e-07	5.24e-06	5.7837
ENSG00000171130	ATP6V0E2	1.60021	4.89e-07	5.24e-06	5.78233
ENSG00000113621	TXNDC15	1.29639	4.89e-07	5.24e-06	5.78331
ENSG00000123810	B9D2	1.25241	4.91e-07	5.25e-06	5.7791
ENSG00000148450	MSRB2	1.24555	4.94e-07	5.28e-06	5.77378
ENSG00000106617	PRKAG2	1.26739	4.96e-07	5.3e-06	5.76886
ENSG00000078725	BRINP1	1.10607	4.96e-07	5.3e-06	5.76913
ENSG00000142002	DPP9	1.18543	4.98e-07	5.32e-06	5.76526
ENSG00000148337	CIZ1	1.15411	4.99e-07	5.32e-06	5.7642
ENSG00000113282	CLINT1	1.24802	5.02e-07	5.35e-06	5.75748
ENSG00000166292	TMEM100	1.16625	5.02e-07	5.35e-06	5.75767
ENSG00000124120	TTPAL	1.21718	5.06e-07	5.39e-06	5.74956
ENSG00000064607	SUGP2	1.20704	5.09e-07	5.42e-06	5.74403
ENSG00000114796	KLHL24	1.32452	5.11e-07	5.44e-06	5.74
ENSG00000116095	PLEKHA3	1.19556	5.19e-07	5.52e-06	5.72572
ENSG00000164081	TEX264	1.17113	5.2e-07	5.52e-06	5.72492
ENSG00000182752	PAPPA	1.12736	5.2e-07	5.53e-06	5.7235
ENSG00000104728	ARHGEF10	1.15657	5.22e-07	5.54e-06	5.72088
ENSG00000176396	EID2	1.21942	5.25e-07	5.57e-06	5.71474
ENSG00000160785	SLC25A44	1.21799	5.27e-07	5.59e-06	5.71183
ENSG00000067955	CBFB	1.22152	5.3e-07	5.62e-06	5.70573
ENSG00000143799	PARP1	1.29676	5.31e-07	5.63e-06	5.70331
ENSG00000143032	BARHL2	1.01547	5.39e-07	5.71e-06	5.68935
ENSG00000185838	GNB1L	1.2156	5.41e-07	5.73e-06	5.68541
ENSG00000178188	SH2B1	1.20402	5.46e-07	5.78e-06	5.67711
ENSG00000070610	GBA2	1.20814	5.47e-07	5.78e-06	5.67539
ENSG00000176438	SYNE3	1.41929	5.49e-07	5.8e-06	5.67209
ENSG00000166925	TSC22D4	1.21442	5.49e-07	5.8e-06	5.67206
ENSG00000140859	KIFC3	1.38075	5.5e-07	5.8e-06	5.67064
ENSG00000178217	SH2D4B	1.03432	5.51e-07	5.82e-06	5.66805
ENSG00000144711	IQSEC1	1.32466	5.53e-07	5.83e-06	5.66461
ENSG00000161714	PLCD3	1.307	5.57e-07	5.86e-06	5.65882
ENSG00000113716	HMGXB3	1.17583	5.58e-07	5.87e-06	5.65706
ENSG00000141404	GNAL	1.47867	5.61e-07	5.9e-06	5.65187
ENSG00000064270	ATP2C2	1.18993	5.62e-07	5.91e-06	5.64941
ENSG00000160013	PTGIR	1.09664	5.64e-07	5.93e-06	5.64627
ENSG00000080345	RIF1	1.35702	5.67e-07	5.95e-06	5.64146
ENSG00000185272	RBM11	1.60502	5.77e-07	6.06e-06	5.62465
ENSG00000180979	LRRC57	1.25045	5.8e-07	6.08e-06	5.61941
ENSG00000112541	PDE10A	1.17346	5.8e-07	6.08e-06	5.62066
ENSG00000143595	AQP10	1.06625	5.82e-07	6.09e-06	5.61735
ENSG00000075073	TACR2	1.2079	5.84e-07	6.11e-06	5.61289
ENSG00000182179	UBA7	1.37312	5.86e-07	6.13e-06	5.60985
ENSG00000105997	HOXA3	1.28567	5.9e-07	6.17e-06	5.60369
ENSG00000100196	KDELR3	1.75803	5.93e-07	6.19e-06	5.59907
ENSG00000183258	DDX41	1.15464	5.95e-07	6.21e-06	5.59484
ENSG00000196946	ZNF705A	1.10043	5.95e-07	6.21e-06	5.59551
ENSG00000153132	CLGN	1.61621	6.01e-07	6.27e-06	5.58542
ENSG00000182118	FAM89A	1.47375	6.01e-07	6.27e-06	5.58531
ENSG00000140470	ADAMTS17	1.45967	6.04e-07	6.29e-06	5.58144
ENSG00000169330	MINAR1	1.23143	6.04e-07	6.29e-06	5.58069
ENSG00000152102	FAM168B	1.19058	6.07e-07	6.31e-06	5.57727
ENSG00000128040	SPINK2	1.63509	6.09e-07	6.33e-06	5.57375
ENSG00000077235	GTF3C1	1.22675	6.1e-07	6.35e-06	5.5713
ENSG00000168589	DYNLRB2	1.23251	6.14e-07	6.38e-06	5.56508
ENSG00000136872	ALDOB	1.23123	6.17e-07	6.41e-06	5.56113
ENSG00000166454	ATMIN	1.23668	6.22e-07	6.45e-06	5.55385
ENSG00000198574	SH2D1B	1.09733	6.25e-07	6.48e-06	5.54933
ENSG00000130748	TMEM160	1.23718	6.26e-07	6.48e-06	5.54771
ENSG00000142186	SCYL1	1.18887	6.26e-07	6.48e-06	5.5475
ENSG00000181830	SLC35C1	1.30592	6.28e-07	6.5e-06	5.54448
ENSG00000131089	ARHGEF9	1.25128	6.32e-07	6.54e-06	5.53834
ENSG00000104635	SLC39A14	1.41266	6.33e-07	6.55e-06	5.53587
ENSG00000135540	NHSL1	1.18278	6.33e-07	6.55e-06	5.53578
ENSG00000182578	CSF1R	1.40539	6.35e-07	6.56e-06	5.53366
ENSG00000160633	SAFB	1.18266	6.37e-07	6.58e-06	5.53123
ENSG00000148926	ADM	2.08688	6.41e-07	6.61e-06	5.52508
ENSG00000157927	RADIL	1.07768	6.42e-07	6.63e-06	5.52269
ENSG00000181322	NME9	1.14114	6.44e-07	6.64e-06	5.51989
ENSG00000196367	TRRAP	1.22362	6.45e-07	6.64e-06	5.51907
ENSG00000196776	CD47	1.19071	6.46e-07	6.66e-06	5.5166
ENSG00000264364	DYNLL2	1.23459	6.47e-07	6.66e-06	5.51585
ENSG00000120341	SEC16B	1.46484	6.48e-07	6.67e-06	5.514
ENSG00000163681	SLMAP	1.16182	6.48e-07	6.67e-06	5.51363
ENSG00000115286	NDUFS7	1.22863	6.51e-07	6.69e-06	5.50975
ENSG00000145494	NDUFS6	1.15976	6.53e-07	6.7e-06	5.50704
ENSG00000147168	IL2RG	1.54435	6.58e-07	6.75e-06	5.50005
ENSG00000171931	FBXW10	1.13349	6.59e-07	6.76e-06	5.49759
ENSG00000113658	SMAD5	1.22118	6.69e-07	6.86e-06	5.4836
ENSG00000036448	MYOM2	1.47645	6.71e-07	6.86e-06	5.48142
ENSG00000154832	CXXC1	1.26573	6.79e-07	6.94e-06	5.47006
ENSG00000154639	CXADR	1.35919	6.8e-07	6.94e-06	5.46828
ENSG00000268163	AC004076.1	1.31822	6.8e-07	6.94e-06	5.46844
ENSG00000176472	ZNF575	1.21147	6.8e-07	6.94e-06	5.46889
ENSG00000102144	PGK1	1.18121	6.84e-07	6.97e-06	5.46302
ENSG00000118503	TNFAIP3	1.75247	6.87e-07	7e-06	5.45886
ENSG00000205572	SERF1B	1.23117	6.92e-07	7.05e-06	5.45119
ENSG00000104848	KCNA7	1.04035	7e-07	7.13e-06	5.44084
ENSG00000168938	PPIC	1.63986	7.07e-07	7.19e-06	5.43113
ENSG00000140995	DEF8	1.26244	7.07e-07	7.19e-06	5.43064
ENSG00000105784	RUNDC3B	1.14791	7.08e-07	7.2e-06	5.4292
ENSG00000151718	WWC2	1.56772	7.09e-07	7.2e-06	5.42838
ENSG00000115825	PRKD3	1.53973	7.09e-07	7.2e-06	5.42781
ENSG00000196912	ANKRD36B	1.34876	7.15e-07	7.26e-06	5.42003
ENSG00000143632	ACTA1	1.23532	7.19e-07	7.29e-06	5.41572
ENSG00000204176	SYT15	1.16086	7.19e-07	7.29e-06	5.41563
ENSG00000072736	NFATC3	1.2607	7.2e-07	7.3e-06	5.41321
ENSG00000163635	ATXN7	1.25748	7.22e-07	7.31e-06	5.41123
ENSG00000135002	RFK	1.25009	7.22e-07	7.31e-06	5.41095
ENSG00000175115	PACS1	1.31345	7.25e-07	7.33e-06	5.40766
ENSG00000271303	SRXN1	1.26813	7.27e-07	7.35e-06	5.40502
ENSG00000042317	SPATA7	1.20688	7.31e-07	7.39e-06	5.39952
ENSG00000196071	OR2L13	1.05557	7.34e-07	7.41e-06	5.395
ENSG00000188647	PTAR1	1.21939	7.4e-07	7.46e-06	5.38813
ENSG00000054392	HHAT	1.37352	7.41e-07	7.48e-06	5.38595
ENSG00000204540	PSORS1C1	1.18923	7.45e-07	7.51e-06	5.38139
ENSG00000162267	ITIH3	1.24548	7.6e-07	7.65e-06	5.36234
ENSG00000006712	PAF1	1.1856	7.6e-07	7.65e-06	5.36232
ENSG00000117899	MESD	1.21405	7.64e-07	7.68e-06	5.35734
ENSG00000179008	C14orf39	1.28455	7.66e-07	7.7e-06	5.35472
ENSG00000149930	TAOK2	1.21495	7.67e-07	7.7e-06	5.35404
ENSG00000113712	CSNK1A1	1.16615	7.72e-07	7.76e-06	5.34677
ENSG00000132677	RHBG	1.15132	7.79e-07	7.82e-06	5.33824
ENSG00000185219	ZNF445	1.26613	7.81e-07	7.83e-06	5.33673
ENSG00000205277	MUC12	1.42434	7.87e-07	7.89e-06	5.32856
ENSG00000175634	RPS6KB2	1.15261	7.88e-07	7.89e-06	5.3281
ENSG00000147613	PSKH2	1.07885	7.95e-07	7.96e-06	5.31912
ENSG00000100097	LGALS1	1.49495	7.98e-07	7.99e-06	5.31599
ENSG00000155926	SLA	1.65273	8e-07	8.01e-06	5.31324
ENSG00000142677	IL22RA1	1.28062	8.01e-07	8.01e-06	5.31242
ENSG00000136158	SPRY2	1.29404	8.1e-07	8.09e-06	5.3015
ENSG00000258674	AC011448.1	1.15425	8.1e-07	8.09e-06	5.30199
ENSG00000205085	FAM71F2	1.36116	8.12e-07	8.11e-06	5.29941
ENSG00000133962	CATSPERB	1.11278	8.12e-07	8.11e-06	5.29877
ENSG00000178403	NEUROG2	1.13178	8.14e-07	8.12e-06	5.29701
ENSG00000140829	DHX38	1.26924	8.22e-07	8.19e-06	5.28787
ENSG00000101152	DNAJC5	1.18641	8.25e-07	8.21e-06	5.2843
ENSG00000135940	COX5B	1.14752	8.29e-07	8.25e-06	5.27919
ENSG00000010404	IDS	1.38162	8.32e-07	8.27e-06	5.27636
ENSG00000136811	ODF2	1.24955	8.34e-07	8.29e-06	5.27383
ENSG00000176920	FUT2	1.14709	8.34e-07	8.29e-06	5.27417
ENSG00000173269	MMRN2	1.28916	8.35e-07	8.29e-06	5.27306
ENSG00000198728	LDB1	1.18511	8.36e-07	8.3e-06	5.27134
ENSG00000171435	KSR2	1.05386	8.48e-07	8.42e-06	5.25769
ENSG00000104892	KLC3	1.12304	8.52e-07	8.45e-06	5.25382
ENSG00000165621	OXGR1	1.06022	8.52e-07	8.45e-06	5.25326
ENSG00000240021	TEX35	1.18132	8.6e-07	8.52e-06	5.24472
ENSG00000163013	FBXO41	1.40737	8.65e-07	8.57e-06	5.23847
ENSG00000102962	CCL22	1.05636	8.67e-07	8.58e-06	5.23683
ENSG00000113580	NR3C1	1.31454	8.92e-07	8.83e-06	5.20948
ENSG00000131188	PRR7	1.37672	8.96e-07	8.85e-06	5.20551
ENSG00000114573	ATP6V1A	1.24581	8.96e-07	8.85e-06	5.20559
ENSG00000163746	PLSCR2	1.11554	8.96e-07	8.85e-06	5.20504
ENSG00000179761	PIPOX	1.17056	8.98e-07	8.86e-06	5.20274
ENSG00000136237	RAPGEF5	1.58504	9e-07	8.88e-06	5.20091
ENSG00000185340	GAS2L1	1.22536	9.01e-07	8.88e-06	5.20058
ENSG00000132153	DHX30	1.16018	9.02e-07	8.88e-06	5.19916
ENSG00000118200	CAMSAP2	1.34371	9.07e-07	8.93e-06	5.19373
ENSG00000205413	SAMD9	1.43384	9.11e-07	8.96e-06	5.18966
ENSG00000044524	EPHA3	1.20294	9.23e-07	9.08e-06	5.17748
ENSG00000155265	GOLGA7B	1.05789	9.33e-07	9.17e-06	5.1666
ENSG00000179715	PCED1B	1.53317	9.34e-07	9.17e-06	5.16624
ENSG00000085465	OVGP1	1.31824	9.36e-07	9.19e-06	5.16409
ENSG00000105146	AURKC	1.21766	9.45e-07	9.27e-06	5.15498
ENSG00000148655	LRMDA	1.35747	9.49e-07	9.31e-06	5.15058
ENSG00000239305	RNF103	1.28111	9.5e-07	9.31e-06	5.14979
ENSG00000166407	LMO1	1.08027	9.5e-07	9.31e-06	5.14933
ENSG00000156500	FAM122C	1.20714	9.53e-07	9.33e-06	5.14697
ENSG00000172716	SLFN11	1.55605	9.53e-07	9.34e-06	5.14615
ENSG00000130449	ZSWIM6	1.2695	9.6e-07	9.39e-06	5.13986
ENSG00000158528	PPP1R9A	1.31411	9.66e-07	9.45e-06	5.13348
ENSG00000248098	BCKDHA	1.21994	9.69e-07	9.47e-06	5.13098
ENSG00000162745	OLFML2B	1.18098	9.76e-07	9.53e-06	5.12408
ENSG00000185049	NELFA	1.21184	9.87e-07	9.64e-06	5.11317
ENSG00000233932	CTXN2	1.06486	9.89e-07	9.66e-06	5.11111
ENSG00000140545	MFGE8	1.86061	9.93e-07	9.68e-06	5.10748
ENSG00000182600	SNORC	1.24781	9.93e-07	9.68e-06	5.10752
ENSG00000213886	UBD	1.34931	9.95e-07	9.7e-06	5.10546
ENSG00000139567	ACVRL1	1.18581	1e-06	9.75e-06	5.09975
ENSG00000079332	SAR1A	1.18804	1e-06	9.77e-06	5.09785
ENSG00000272968	RBAK-RBAKDN	1.12706	1.01e-06	9.8e-06	5.09449
ENSG00000140367	UBE2Q2	1.25995	1.01e-06	9.82e-06	5.09125
ENSG00000114638	UPK1B	1.02916	1.01e-06	9.86e-06	5.0877
ENSG00000165929	TC2N	1.21872	1.02e-06	9.89e-06	5.08301
ENSG00000064687	ABCA7	1.29398	1.02e-06	9.93e-06	5.07939
ENSG00000103742	IGDCC4	1.05912	1.03e-06	1e-05	5.06915
ENSG00000106537	TSPAN13	1.41252	1.05e-06	1.02e-05	5.05081
ENSG00000105750	ZNF85	1.37226	1.05e-06	1.02e-05	5.05509
ENSG00000204252	HLA-DOA	1.23948	1.05e-06	1.02e-05	5.04994
ENSG00000143450	OAZ3	1.17633	1.05e-06	1.02e-05	5.05309
ENSG00000116299	ELAPOR1	1.1274	1.05e-06	1.02e-05	5.05269
ENSG00000176635	HORMAD2	1.10692	1.05e-06	1.02e-05	5.05176
ENSG00000068137	PLEKHH3	1.51037	1.06e-06	1.02e-05	5.04685
ENSG00000122691	TWIST1	1.2963	1.07e-06	1.03e-05	5.03527
ENSG00000185483	ROR1	1.13515	1.07e-06	1.03e-05	5.04055
ENSG00000137825	ITPKA	1.22444	1.08e-06	1.04e-05	5.02659
ENSG00000103723	AP3B2	1.21735	1.08e-06	1.04e-05	5.02384
ENSG00000119318	RAD23B	1.17656	1.08e-06	1.04e-05	5.02755
ENSG00000241106	HLA-DOB	1.46759	1.09e-06	1.05e-05	5.01936
ENSG00000107140	TESK1	1.24174	1.09e-06	1.05e-05	5.01673
ENSG00000177885	GRB2	1.2112	1.09e-06	1.05e-05	5.0158
ENSG00000203710	CR1	1.32169	1.1e-06	1.05e-05	5.0127
ENSG00000227471	AKR1B15	1.17831	1.1e-06	1.05e-05	5.0133
ENSG00000102858	MGRN1	1.18947	1.1e-06	1.06e-05	5.00838
ENSG00000130204	TOMM40	1.18009	1.1e-06	1.06e-05	5.01011
ENSG00000118263	KLF7	1.46784	1.11e-06	1.06e-05	5.00308
ENSG00000115548	KDM3A	1.26312	1.11e-06	1.06e-05	5.00508
ENSG00000082153	BZW1	1.21639	1.12e-06	1.07e-05	4.99503
ENSG00000126456	IRF3	1.20001	1.12e-06	1.08e-05	4.98993
ENSG00000167552	TUBA1A	1.66617	1.13e-06	1.08e-05	4.98676
ENSG00000116260	QSOX1	1.31191	1.13e-06	1.08e-05	4.98227
ENSG00000171368	TPPP	1.262	1.13e-06	1.08e-05	4.98474
ENSG00000116194	ANGPTL1	1.24707	1.13e-06	1.08e-05	4.9826
ENSG00000025800	KPNA6	1.17558	1.13e-06	1.08e-05	4.98601
ENSG00000172493	AFF1	1.26601	1.14e-06	1.09e-05	4.97867
ENSG00000186583	SPATC1	1.30128	1.15e-06	1.1e-05	4.9658
ENSG00000055955	ITIH4	1.2984	1.15e-06	1.1e-05	4.96414
ENSG00000157240	FZD1	1.27561	1.15e-06	1.1e-05	4.96777
ENSG00000062598	ELMO2	1.26509	1.15e-06	1.1e-05	4.9661
ENSG00000169184	MN1	1.29076	1.16e-06	1.1e-05	4.96018
ENSG00000103168	TAF1C	1.27173	1.16e-06	1.1e-05	4.96322
ENSG00000164976	MYORG	1.14363	1.16e-06	1.11e-05	4.95597
ENSG00000183647	ZNF530	1.24321	1.17e-06	1.11e-05	4.94791
ENSG00000205922	ONECUT3	1.03635	1.18e-06	1.12e-05	4.94428
ENSG00000038945	MSR1	1.44041	1.19e-06	1.12e-05	4.93791
ENSG00000160410	SHKBP1	1.19115	1.19e-06	1.12e-05	4.93705
ENSG00000115091	ACTR3	1.21978	1.2e-06	1.13e-05	4.92906
ENSG00000180263	FGD6	1.37697	1.2e-06	1.14e-05	4.92406
ENSG00000083812	ZNF324	1.17411	1.21e-06	1.15e-05	4.9166
ENSG00000159753	CARMIL2	1.35863	1.22e-06	1.15e-05	4.91359
ENSG00000177548	RABEP2	1.2402	1.22e-06	1.15e-05	4.90911
ENSG00000068323	TFE3	1.21126	1.22e-06	1.15e-05	4.91006
ENSG00000249222	ATP5MGL	1.16796	1.22e-06	1.15e-05	4.90967
ENSG00000178053	MLF1	1.65675	1.23e-06	1.16e-05	4.90201
ENSG00000087111	PIGS	1.19065	1.23e-06	1.16e-05	4.90232
ENSG00000071127	WDR1	1.23994	1.25e-06	1.18e-05	4.88506
ENSG00000197601	FAR1	1.23084	1.25e-06	1.18e-05	4.89029
ENSG00000184271	POU6F1	1.26978	1.27e-06	1.2e-05	4.87213
ENSG00000131507	NDFIP1	1.15523	1.29e-06	1.21e-05	4.85933
ENSG00000187690	EZHIP	1.07044	1.29e-06	1.21e-05	4.86183
ENSG00000120963	ZNF706	1.19049	1.29e-06	1.22e-05	4.85643
ENSG00000164265	SCGB3A2	1.39255	1.3e-06	1.22e-05	4.85305
ENSG00000103978	TMEM87A	1.18455	1.3e-06	1.22e-05	4.85244
ENSG00000128908	INO80	1.17406	1.3e-06	1.22e-05	4.85061
ENSG00000114098	ARMC8	1.16768	1.3e-06	1.22e-05	4.85112
ENSG00000160199	PKNOX1	1.13861	1.3e-06	1.22e-05	4.84924
ENSG00000168005	SPINDOC	1.22879	1.31e-06	1.23e-05	4.8448
ENSG00000243335	KCTD7	1.21892	1.31e-06	1.23e-05	4.84115
ENSG00000146067	FAM193B	1.24168	1.32e-06	1.23e-05	4.83831
ENSG00000134470	IL15RA	1.24161	1.32e-06	1.24e-05	4.83483
ENSG00000165264	NDUFB6	1.22423	1.33e-06	1.24e-05	4.82993
ENSG00000168395	ING5	1.21457	1.34e-06	1.25e-05	4.82356
ENSG00000143387	CTSK	1.31256	1.36e-06	1.27e-05	4.81083
ENSG00000135637	CCDC142	1.27534	1.36e-06	1.27e-05	4.81015
ENSG00000114745	GORASP1	1.2027	1.36e-06	1.27e-05	4.80708
ENSG00000267281	ATF7-NPFF	1.16445	1.36e-06	1.27e-05	4.81039
ENSG00000196214	ZNF766	1.19715	1.37e-06	1.28e-05	4.7982
ENSG00000180998	GPR137C	1.1513	1.37e-06	1.28e-05	4.79976
ENSG00000107175	CREB3	1.19598	1.38e-06	1.28e-05	4.79656
ENSG00000066248	NGEF	1.11936	1.38e-06	1.28e-05	4.79545
ENSG00000162522	KIAA1522	1.37366	1.39e-06	1.3e-05	4.78511
ENSG00000117407	ARTN	1.8217	1.4e-06	1.3e-05	4.77818
ENSG00000067369	TP53BP1	1.20298	1.4e-06	1.3e-05	4.77757
ENSG00000122824	NUDT10	1.11483	1.41e-06	1.31e-05	4.77243
ENSG00000119147	ECRG4	1.12487	1.42e-06	1.32e-05	4.7675
ENSG00000145016	RUBCN	1.25033	1.43e-06	1.32e-05	4.76106
ENSG00000099326	MZF1	1.28704	1.43e-06	1.33e-05	4.75786
ENSG00000198363	ASPH	1.38016	1.44e-06	1.33e-05	4.75188
ENSG00000185115	NSMCE3	1.21836	1.44e-06	1.33e-05	4.75401
ENSG00000231861	OR5K2	1.07286	1.44e-06	1.33e-05	4.75246
ENSG00000166188	ZNF319	1.21105	1.45e-06	1.34e-05	4.7479
ENSG00000135702	CHST5	1.06123	1.45e-06	1.34e-05	4.74745
ENSG00000164111	ANXA5	1.22747	1.46e-06	1.35e-05	4.73953
ENSG00000127452	FBXL12	1.20777	1.46e-06	1.35e-05	4.73746
ENSG00000214309	MBLAC1	1.19772	1.46e-06	1.35e-05	4.73998
ENSG00000167461	RAB8A	1.263	1.47e-06	1.36e-05	4.73173
ENSG00000176595	KBTBD11	1.16676	1.48e-06	1.36e-05	4.73089
ENSG00000089692	LAG3	1.9906	1.49e-06	1.37e-05	4.72049
ENSG00000203950	RTL8A	1.36367	1.49e-06	1.37e-05	4.72145
ENSG00000111145	ELK3	1.26324	1.49e-06	1.37e-05	4.7237
ENSG00000169180	XPO6	1.17965	1.49e-06	1.37e-05	4.72144
ENSG00000060656	PTPRU	1.36669	1.5e-06	1.38e-05	4.71696
ENSG00000158683	PKD1L1	1.29212	1.5e-06	1.38e-05	4.71328
ENSG00000205423	CNEP1R1	1.23669	1.5e-06	1.38e-05	4.71276
ENSG00000157423	HYDIN	1.20349	1.5e-06	1.38e-05	4.71779
ENSG00000259417	CTXND1	1.04009	1.51e-06	1.38e-05	4.7104
ENSG00000143153	ATP1B1	1.6147	1.51e-06	1.39e-05	4.70706
ENSG00000105928	GSDME	1.20797	1.51e-06	1.39e-05	4.70679
ENSG00000170689	HOXB9	1.06043	1.51e-06	1.39e-05	4.70611
ENSG00000093167	LRRFIP2	1.20437	1.52e-06	1.39e-05	4.70444
ENSG00000152292	SH2D6	1.1551	1.52e-06	1.39e-05	4.70447
ENSG00000176182	MYPOP	1.21654	1.54e-06	1.41e-05	4.68715
ENSG00000125398	SOX9	1.17006	1.54e-06	1.41e-05	4.68926
ENSG00000169758	TMEM266	1.11183	1.54e-06	1.41e-05	4.68987
ENSG00000124313	IQSEC2	1.38476	1.55e-06	1.42e-05	4.68411
ENSG00000180878	C11orf42	1.05686	1.55e-06	1.42e-05	4.68217
ENSG00000198283	OR5B21	1.06639	1.56e-06	1.42e-05	4.67985
ENSG00000167419	LPO	1.0799	1.58e-06	1.44e-05	4.66578
ENSG00000171067	C11orf24	1.20913	1.58e-06	1.45e-05	4.66277
ENSG00000205744	DENND1C	1.37881	1.59e-06	1.45e-05	4.65785
ENSG00000164403	SHROOM1	1.34753	1.59e-06	1.45e-05	4.6585
ENSG00000166997	CNPY4	1.28799	1.59e-06	1.45e-05	4.65668
ENSG00000148248	SURF4	1.15745	1.6e-06	1.45e-05	4.65518
ENSG00000008311	AASS	1.40662	1.6e-06	1.46e-05	4.65289
ENSG00000102100	SLC35A2	1.32462	1.6e-06	1.46e-05	4.65306
ENSG00000130711	PRDM12	1.08768	1.61e-06	1.47e-05	4.64589
ENSG00000117280	RAB29	1.5048	1.62e-06	1.47e-05	4.64287
ENSG00000119630	PGF	1.17785	1.63e-06	1.48e-05	4.63435
ENSG00000175344	CHRNA7	1.08337	1.65e-06	1.5e-05	4.62162
ENSG00000178252	WDR6	1.22528	1.66e-06	1.51e-05	4.61857
ENSG00000106789	CORO2A	1.13091	1.66e-06	1.51e-05	4.61578
ENSG00000075426	FOSL2	1.50556	1.67e-06	1.51e-05	4.61462
ENSG00000082458	DLG3	1.30649	1.67e-06	1.51e-05	4.61277
ENSG00000114999	TTL	1.22111	1.67e-06	1.51e-05	4.61108
ENSG00000110777	POU2AF1	1.30015	1.71e-06	1.55e-05	4.58757
ENSG00000130770	ATP5IF1	1.18044	1.73e-06	1.56e-05	4.58197
ENSG00000138018	SELENOI	1.17116	1.74e-06	1.57e-05	4.575
ENSG00000175697	GPR156	1.07544	1.75e-06	1.58e-05	4.569
ENSG00000186377	CYP4X1	1.05031	1.75e-06	1.58e-05	4.56851
ENSG00000172757	CFL1	1.17492	1.76e-06	1.58e-05	4.56552
ENSG00000011638	TMEM159	1.22431	1.77e-06	1.6e-05	4.55566
[truncated: 7,815 more rows]
