# Supplementary material for: Dissecting the Biological Relevance and Clinical Impact of lncRNA MIAT in Multiple Myeloma
Source: MDPI journal article supplement (doi:10.3390/cancers13215518), 2021-11-03
Supplement: s1 [file Supplementary_Table_4.xlsx]

## Sheet: Foglio2
Table S4. List of significant gene sets enriched in last versus first MIAT quartile (194 MM in each group) by GSEA analysis. Up- and down-regulated gene sets of Kegg, Hallmark, c2 gene perturbations (c2gp) collections (version 7.2) are ordered according to nominal p-value and Normalized Enrichment Score (NES). C2gp gene sets were filtered on "Myeloma" term. * indicate gene sets that were enriched…
NAME	SIZE	NES	NOM p-val	FDR q-val
KEGG_CELL_ADHESION_MOLECULES_CAMS*	82	3.6163	0	0
KEGG_SYSTEMIC_LUPUS_ERYTHEMATOSUS*	54	3.25196	0	0
KEGG_LEISHMANIA_INFECTION*	47	3.02394	0	0
KEGG_TIGHT_JUNCTION*	73	2.93705	0	0
KEGG_CHEMOKINE_SIGNALING_PATHWAY*	105	2.86918	0	0
KEGG_PATHWAYS_IN_CANCER*	191	2.73726	0	0
KEGG_FC_GAMMA_R_MEDIATED_PHAGOCYTOSIS*	68	2.70677	0	0
KEGG_ASTHMA*	17	2.59888	0	0.000416935
KEGG_B_CELL_RECEPTOR_SIGNALING_PATHWAY*	45	2.56466	0	0.00103247
KEGG_LEUKOCYTE_TRANSENDOTHELIAL_MIGRATION*	67	2.54303	0	0.000929227
KEGG_INTESTINAL_IMMUNE_NETWORK_FOR_IGA_PRODUCTION*	29	2.49825	0	0.00114751
KEGG_JAK_STAT_SIGNALING_PATHWAY*	82	2.48233	0	0.00114688
KEGG_PRIMARY_IMMUNODEFICIENCY*	20	2.36507	0	0.00190599
KEGG_COMPLEMENT_AND_COAGULATION_CASCADES*	39	2.35638	0	0.00193277
KEGG_PHOSPHATIDYLINOSITOL_SIGNALING_SYSTEM*	45	2.23203	0	0.00475442
KEGG_ALDOSTERONE_REGULATED_SODIUM_REABSORPTION*	24	2.21638	0	0.00490681
KEGG_VIRAL_MYOCARDITIS*	45	2.16023	0	0.00688241
KEGG_MAPK_SIGNALING_PATHWAY*	147	2.15012	0	0.00711972
KEGG_LYSOSOME	74	2.01227	0	0.0165344
KEGG_ADHERENS_JUNCTION*	51	2.30293	0.00132275	0.00261613
KEGG_HEMATOPOIETIC_CELL_LINEAGE*	49	2.22038	0.00140252	0.00505702
KEGG_TYPE_II_DIABETES_MELLITUS*	24	2.23205	0.0014771	0.00505157
KEGG_ANTIGEN_PROCESSING_AND_PRESENTATION*	48	2.1938	0.00270636	0.00556113
KEGG_TYPE_I_DIABETES_MELLITUS*	22	2.08564	0.00310559	0.0108853
KEGG_GRAFT_VERSUS_HOST_DISEASE*	23	2.00672	0.00316456	0.016704
KEGG_ENDOCYTOSIS*	116	1.89494	0.00362757	0.0266965
KEGG_NATURAL_KILLER_CELL_MEDIATED_CYTOTOXICITY*	78	2.03552	0.0037831	0.0148002
KEGG_MELANOGENESIS*	66	2.05924	0.00387597	0.0129892
KEGG_ALLOGRAFT_REJECTION*	21	2.10549	0.00440529	0.00962472
KEGG_AUTOIMMUNE_THYROID_DISEASE*	28	1.98207	0.00445765	0.0187772
KEGG_FC_EPSILON_RI_SIGNALING_PATHWAY*	42	1.94861	0.00550964	0.022245
KEGG_T_CELL_RECEPTOR_SIGNALING_PATHWAY*	63	1.92713	0.00659631	0.0245878
KEGG_GAP_JUNCTION	45	1.90544	0.00668449	0.0262891
KEGG_BASAL_CELL_CARCINOMA*	34	1.82738	0.0100865	0.0388122
KEGG_AXON_GUIDANCE*	74	1.94782	0.011378	0.0217077
KEGG_CHRONIC_MYELOID_LEUKEMIA*	43	1.81585	0.0122616	0.0397938
KEGG_SMALL_CELL_LUNG_CANCER*	48	1.9025	0.0123796	0.0260345
KEGG_ABC_TRANSPORTERS*	26	1.82955	0.0135542	0.0394267
KEGG_APOPTOSIS*	48	1.8254	0.014966	0.0381872
KEGG_NON_SMALL_CELL_LUNG_CANCER*	29	1.77717	0.0151976	0.049128
KEGG_ALZHEIMERS_DISEASE	100	1.71273	0.0185414	0.0674934
KEGG_PRION_DISEASES	17	1.72997	0.0188679	0.0636216
KEGG_ECM_RECEPTOR_INTERACTION*	53	1.70817	0.0261438	0.0678747
KEGG_INOSITOL_PHOSPHATE_METABOLISM*	29	1.66777	0.0272206	0.0775796
KEGG_NEUROTROPHIN_SIGNALING_PATHWAY	77	1.68104	0.0307692	0.0735286
KEGG_PATHOGENIC_ESCHERICHIA_COLI_INFECTION*	35	1.6937	0.031339	0.0720492
KEGG_UBIQUITIN_MEDIATED_PROTEOLYSIS*	90	1.71891	0.0334988	0.0664289
KEGG_ARRHYTHMOGENIC_RIGHT_VENTRICULAR_CARDIOMYOPATHY_ARVC*	51	1.6866	0.0345782	0.0728112
KEGG_VEGF_SIGNALING_PATHWAY	46	1.666	0.0359613	0.0766398
KEGG_LYSINE_DEGRADATION	19	1.65244	0.0390625	0.0804839
KEGG_FOCAL_ADHESION*	119	1.61531	0.0412736	0.0920708
KEGG_VIBRIO_CHOLERAE_INFECTION	35	1.62548	0.0423358	0.0889869
KEGG_REGULATION_OF_ACTIN_CYTOSKELETON*	122	1.63101	0.0437424	0.0879598
KEGG_GLYCEROLIPID_METABOLISM*	27	1.60962	0.0484581	0.092947
HALLMARK_EPITHELIAL_MESENCHYMAL_TRANSITION*	120	3.66056	0	0
HALLMARK_APICAL_JUNCTION*	120	3.57194	0	0
HALLMARK_INTERFERON_GAMMA_RESPONSE*	120	3.54806	0	0
HALLMARK_IL2_STAT5_SIGNALING*	111	3.48533	0	0
HALLMARK_TNFA_SIGNALING_VIA_NFKB*	90	3.21535	0	0
HALLMARK_COMPLEMENT*	116	2.91109	0	0
HALLMARK_IL6_JAK_STAT3_SIGNALING*	55	2.84603	0	0
HALLMARK_KRAS_SIGNALING_UP*	106	2.83426	0	0
HALLMARK_COAGULATION*	72	2.82605	0	0
HALLMARK_ALLOGRAFT_REJECTION*	111	2.78236	0	0
HALLMARK_MITOTIC_SPINDLE*	103	2.72646	0	0
HALLMARK_HYPOXIA*	115	2.65747	0	0
HALLMARK_ESTROGEN_RESPONSE_LATE*	103	2.64888	0	0
HALLMARK_UV_RESPONSE_DN*	83	2.63581	0	9.2437e-05
HALLMARK_ESTROGEN_RESPONSE_EARLY*	114	2.59472	0	0.000161488
HALLMARK_ANDROGEN_RESPONSE*	54	2.43144	0	0.000294276
HALLMARK_GLYCOLYSIS*	109	2.38465	0	0.000276966
HALLMARK_MYOGENESIS*	113	2.18195	0.00122699	0.00220056
HALLMARK_INFLAMMATORY_RESPONSE*	107	2.0221	0.00123609	0.00733139
HALLMARK_APOPTOSIS*	93	2.22027	0.00124688	0.00173998
HALLMARK_INTERFERON_ALPHA_RESPONSE*	55	2.07747	0.00401069	0.00554711
HALLMARK_P53_PATHWAY*	112	1.99259	0.00482509	0.00882069
HALLMARK_UV_RESPONSE_UP	95	1.8981	0.00505689	0.0153859
HALLMARK_CHOLESTEROL_HOMEOSTASIS*	39	1.84675	0.00558659	0.0200579
HALLMARK_TGF_BETA_SIGNALING*	30	1.87479	0.0127479	0.0169705
ZHAN_MULTIPLE_MYELOMA_CD1_AND_CD2_DN*	49	4.92398	0	0
ZHAN_MULTIPLE_MYELOMA_MS_UP*	45	4.89398	0	0
ZHAN_MULTIPLE_MYELOMA_CD1_DN*	45	4.83781	0	0
BOYLAN_MULTIPLE_MYELOMA_C_D_DN*	137	3.84152	0	0
ZHAN_MULTIPLE_MYELOMA_LB_UP*	30	3.66356	0	0
ZHAN_MULTIPLE_MYELOMA_CD2_DN*	33	3.19811	0	1.27048e-05
ZHAN_MULTIPLE_MYELOMA_DN*	22	3.12328	0	1.05675e-05
ZHAN_MULTIPLE_MYELOMA_MF_DN*	23	2.86242	0	6.31691e-06
BOYLAN_MULTIPLE_MYELOMA_PCA1_UP*	50	2.62492	0	0.000153056
SHAFFER_IRF4_MULTIPLE_MYELOMA_PROGRAM*	22	2.55056	0	0.000255359
MATTIOLI_MULTIPLE_MYELOMA_WITH_14Q32_TRANSLOCATIONS	23	2.50276	0	0.000364971
ZHAN_MULTIPLE_MYELOMA_HP_UP*	24	2.49884	0	0.00038307
ZHAN_MULTIPLE_MYELOMA_CD1_VS_CD2_DN*	31	2.2728	0	0.00211474
BOYLAN_MULTIPLE_MYELOMA_C_DN*	32	2.39009	0.0014771	0.00092038
BOYLAN_MULTIPLE_MYELOMA_PCA3_UP*	46	2.09995	0.00280899	0.00626575
BOYLAN_MULTIPLE_MYELOMA_D_DN*	50	2.00841	0.00686813	0.0108202
ZHAN_MULTIPLE_MYELOMA_UP	46	1.94517	0.00719425	0.0156055
BOYLAN_MULTIPLE_MYELOMA_D_CLUSTER_DN*	24	1.76138	0.0143084	0.0390797
CORRE_MULTIPLE_MYELOMA_DN	28	1.75219	0.0231481	0.0409362
ABRAHAM_ALPC_VS_MULTIPLE_MYELOMA_DN	16	1.67351	0.032967	0.0585278
KEGG_RIBOSOME*	76	-10.0971	0	0
KEGG_OLFACTORY_TRANSDUCTION*	76	-3.9185	0	0
KEGG_RETINOL_METABOLISM*	31	-2.12824	0	0.0143403
KEGG_VALINE_LEUCINE_AND_ISOLEUCINE_DEGRADATION	15	-1.97944	0.0027248	0.0284962
KEGG_NEUROACTIVE_LIGAND_RECEPTOR_INTERACTION*	112	-2.50153	0.00534759	0.00142256
KEGG_NUCLEOTIDE_EXCISION_REPAIR*	20	-1.85699	0.0110193	0.04979
KEGG_AMINOACYL_TRNA_BIOSYNTHESIS	17	-1.72318	0.0243902	0.0848372
KEGG_STEROID_HORMONE_BIOSYNTHESIS	25	-1.53596	0.0376176	0.127957
HALLMARK_MYC_TARGETS_V1*	84	-3.57803	0	0
HALLMARK_E2F_TARGETS*	61	-1.79029	0.0169492	0.0346784
ZHAN_MULTIPLE_MYELOMA_CD1_AND_CD2_UP	42	-5.76349	0	0
CHNG_MULTIPLE_MYELOMA_HYPERPLOID_UP*	36	-4.85533	0	0
ZHAN_MULTIPLE_MYELOMA_MS_DN	21	-4.1312	0	0
ZHAN_MULTIPLE_MYELOMA_CD2_UP*	26	-4.06441	0	0
ZHAN_MULTIPLE_MYELOMA_CD1_UP	17	-3.69067	0	0
BOYLAN_MULTIPLE_MYELOMA_D_UP	57	-2.16911	0	0.00864058
MOREAUX_MULTIPLE_MYELOMA_BY_TACI_DN	91	-2.16813	0	0.00856573
ZHAN_MULTIPLE_MYELOMA_CD1_VS_CD2_UP*	27	-2.14403	0	0.00963305
BOYLAN_MULTIPLE_MYELOMA_C_D_UP	66	-1.98138	0	0.019313
ABRAHAM_ALPC_VS_MULTIPLE_MYELOMA_UP*	18	-1.6821	0.023622	0.0679648
