# Supplementary material for: Dissecting the Biological Relevance and Clinical Impact of lncRNA MIAT in Multiple Myeloma
Source: MDPI journal article supplement (doi:10.3390/cancers13215518), 2021-11-03
Supplement: s1 [file Supplementary_Table_5.xlsx]

## Sheet: suppl table5
Table S5. KEGG RIBOSOME gene set negatively associated with MIAT IV Quartile compared to MIAT I Quartile in CoMMpass database. Core Enrichment genes are shown in bold
NAME	SIZE	NES	NOM p-val	gene list
KEGG_RIBOSOME	76	-10.09	0	RPL26L1, RPL3L, RPS11, RPS17, UBA52, RPL18, RPLP0, RPL13A, RPS16, RPL21, RPL4, RPSA, RPL3, RPS9, RPL18A, RPL36, RPL35, RPL15, RPL13, RPLP2, RPL14, RPL10, FAU, RPL27A, RPL36A, RPS6, RPL37A, RPS4X, RPS12, RPS27A, RPL24, RPL37, RPL8, RPL22, RPS10, RPS27, RPL36AL, RPL17, RPS7, RPL39, RPL35A, RPS24, RPS8, RPL31, RPS3, RPL30, RPL19, RPL11, RPS23, RPL9, RPL10A, RPL23A, RPS5, RPS20, RPS15A, RPL32, RPL6, …
