# Supplementary material for: Dissecting the Biological Relevance and Clinical Impact of lncRNA MIAT in Multiple Myeloma
Source: Cancers (Basel). 2021 Nov 3;13(21):5518. doi: 10.3390/cancers13215518 (PMC8583301; doi:10.3390/cancers13215518)
Supplement: Supplementary file 1 [file cancers-13-05518-s001.zip]

Archive with 6 entries (6 files):
- cancers-1421739-SI.pdf
- Supplementary_Table_1.xlsx
- Supplementary_Table_2.xlsx
- Supplementary_Table_3.xlsx
- Supplementary_Table_4.xlsx
- Supplementary_Table_5.xlsx
